# Supplementary material for: Palladium-catalyzed amidation of carbazole derivatives via hydroamination of isocyanates
Source: Royal Society of Chemistry journal article supplement (doi:10.1039/d4ob00771a), 2024-01-01

Supporting Information for

**Palladium–catalyzed amidation of carbazole derivatives *via*  
hydroamination of isocyanates**

Meng-Yuan Li,<sup>‡</sup> Peng Chen,<sup>‡</sup> Ming-Xia Pan, Hao-Lan Hu, and Yi-Jun Jiang\*

*E-mail: jiangyijun@nbu.edu.cn*

**TABLE OF CONTENTS:**

|                                                                            |     |
|----------------------------------------------------------------------------|-----|
| 1. General.....                                                            | S1  |
| 2. The experimental details and the analytical data for the products ..... | S1  |
| 3. Copies of NMR spectra.....                                              | S11 |

## 1. General

All commercially available reagents were directly used as received without further purification. All reactions were monitored by thin-layer chromatography (TLC) on gel F<sub>254</sub> plates using UV light as visualizing agent (if applicable), and a solution of phosphomolybdic acid hydrate (50 g/L) in EtOH followed by heating as developing agents.

<sup>1</sup>H NMR and <sup>13</sup>C NMR spectra were recorded in DMSO-*d*<sub>6</sub> or CDCl<sub>3</sub> solution on a Bruker Ascend 500 MHz instrument. Chemical shifts were denoted in ppm (δ), and calibrated by using residual undeuterated solvent (DMSO-*d*<sub>6</sub> (2.50 ppm) or CHCl<sub>3</sub> (7.26 ppm) or tetramethylsilane (0.00 ppm) as internal reference for <sup>1</sup>H NMR and the deuterated solvent (CDCl<sub>3</sub> (77.16 ppm) or DMSO-*d*<sub>6</sub> (39.52 ppm)) as internal standard for <sup>13</sup>C NMR. The coupling constants were reported in Hz. The following abbreviations were used to explain the multiplicities: s = singlet, d = doublet, t = triplet, q = quartet, dt = double triplet, m = multiplet. High-resolution mass spectral analysis (HRMS) data were measured on a Thermo Scientific TM Q Exactive Plus<sup>TM</sup> mass spectrometer by means of the HESI-Orbitrap technique.

## 2. The experimental details and the analytical data for the products

The general experimental procedure was described as follows:

A mixture of carbazole or its derivative (0.25 mmol), isocyanate substrate (0.3 mmol), Pd(PPh<sub>3</sub>)<sub>4</sub> (14.4 mg, 0.05 mmol) and DCM (2.0 mL) were added into a 15 mL pressure tube from LH LABWARE. The reaction mixture was stirred at 80°C for 0.5 h to 4 h (monitored by thin layer chromatography until the carbazole or its derivative had disappeared or the system no longer changed). Then the reaction mixture was cooled to room temperature. The cooled reaction system was added to *n*-hexane (20.0 mL). After stirring for 10 min, a white precipitate formed. The pure product could be obtained by filtering and washing with acetonitrile (4.0 mL).

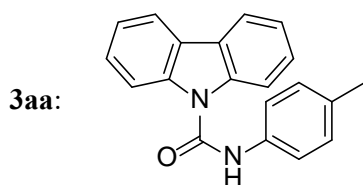

The general experimental procedure was followed to afford product **3aa** as a white solid (75.5 mg, 96% yield). <sup>1</sup>H NMR (500 MHz, CDCl<sub>3</sub>): δ (ppm) = 8.04 (d, *J* = 10.0 Hz, 4H), 7.53–7.44 (m, 5H), 7.37 (t, *J* = 10.0 Hz, 2H), 7.23 (d, *J* = 7.5 Hz, 2H), 2.38 (s, 3H). <sup>13</sup>C NMR (126 MHz, CDCl<sub>3</sub>): δ (ppm) = 150.3, 138.3, 134.6, 130.0, 127.2, 125.4, 122.7, 120.4, 120.2, 113.6, 21.0. HRMS (ESI) *m/z*: [*M*+H]<sup>+</sup> Calcd for C<sub>20</sub>H<sub>12</sub>N<sub>2</sub>O 301.1335; Found 301.1332.

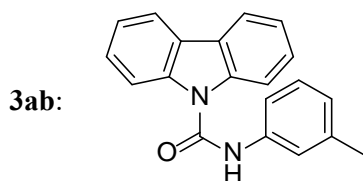

The general experimental procedure was followed to afford product **3ab** as a white solid (67.8 mg, 88% yield). <sup>1</sup>H NMR (500 MHz, CDCl<sub>3</sub>): δ (ppm) = 7.90 (d, *J* = 8.5 Hz, 2H), 7.87 (d, *J* = 7.5 Hz, 2H), 7.55 (s, 1H), 7.40–7.34 (m, 3H), 7.34–7.29 (m, 1H), 7.28–7.19 (m, 3H), 6.96 (d,

$J = 7.5$  Hz, 1H), 2.35 (s, 3H).  $^{13}\text{C}$  NMR (126 MHz,  $\text{CDCl}_3$ ):  $\delta$  (ppm) = 150.2, 139.4, 138.1, 137.2, 129.2, 127.0, 125.6, 125.2, 122.6, 120.6, 120.2, 117.1, 113.5, 21.6. HRMS (ESI)  $m/z$ :  $[M+H]^+$  Calcd for  $\text{C}_{20}\text{H}_{12}\text{N}_2\text{O}$  301.1335; Found 301.1340.

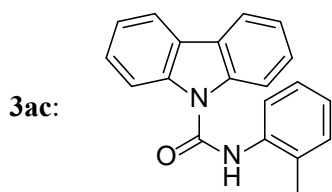

The general experimental procedure was followed to afford product **3ac** as a white solid (66.0 mg, 84% yield).  $^1\text{H}$  NMR (500 MHz,  $\text{DMSO-}d_6$ ):  $\delta$  (ppm) = 10.05 (s, 1H), 8.24 (d,  $J = 5.0$  Hz, 2H), 8.06 (d,  $J = 10.0$  Hz, 2H), 7.57–7.51 (m, 2H), 7.46 (dd,  $J = 7.5, 1.0$  Hz, 1H), 7.38 (t,  $J = 7.5$  Hz, 2H), 7.36–7.32 (m, 1H), 7.28 (dt,  $J = 8.0, 2.0$  Hz, 1H), 7.22 (dt,  $J = 7.5, 1.5$  Hz, 1H), 2.37 (s, 3H).  $^{13}\text{C}$  NMR (126 MHz,  $\text{DMSO-}d_6$ ):  $\delta$  (ppm) = 150.6, 138.1, 136.1, 133.2, 130.7, 126.8, 126.4, 126.1, 125.5, 124.1, 122.0, 120.3, 113.9, 18.4. HRMS (ESI)  $m/z$ :  $[M+H]^+$  Calcd for  $\text{C}_{20}\text{H}_{12}\text{N}_2\text{O}$  301.1335; Found 301.1333.

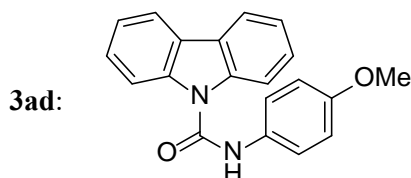

The general experimental procedure was followed to afford product **3ad** as a white solid (69.3 mg, 88% yield).  $^1\text{H}$  NMR (500 MHz,  $\text{CDCl}_3$ ):  $\delta$  (ppm) = 8.04 (d,  $J = 9.0$  Hz, 4H), 7.53–7.43 (m, 5H), 7.37 (t,  $J = 7.5$  Hz, 2H), 6.96 (d,  $J = 9.0$  Hz, 2H), 3.84 (s, 3H).  $^{13}\text{C}$  NMR (126 MHz,  $\text{CDCl}_3$ ):  $\delta$  (ppm) = 157.1, 150.6, 138.3, 130.1, 127.2, 125.4, 122.7, 122.2, 120.4, 114.7, 113.6, 55.7. HRMS (ESI)  $m/z$ :  $[M+H]^+$  Calcd for  $\text{C}_{20}\text{H}_{17}\text{N}_2\text{O}_2$  317.1285; Found 317.1287.

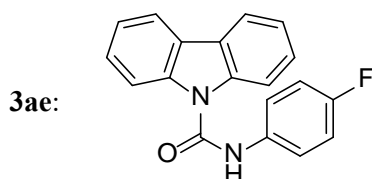

The general experimental procedure was followed to afford product **3ae** as a white solid (65.4 mg, 86% yield).  $^1\text{H}$  NMR (500 MHz,  $\text{CDCl}_3$ ):  $\delta$  (ppm) = 8.01 (t,  $J = 14.5$  Hz, 4H), 7.60–7.51 (m, 3H), 7.47 (t,  $J = 16.0$  Hz, 2H), 7.37 (t,  $J = 15.0$  Hz, 2H), 7.12 (t,  $J = 17.5$  Hz, 2H).  $^{13}\text{C}$  NMR (126 MHz,  $\text{CDCl}_3$ ):  $\delta$  (ppm) = 159.8 (d,  $^1J_{\text{C-F}} = 244.8$  Hz), 150.4, 138.2, 133.2 (d,  $^4J_{\text{C-F}} = 2.8$  Hz), 127.3, 125.4, 122.8, 122.1 (d,  $^3J_{\text{C-F}} = 8.3$  Hz), 120.5, 116.2 (d,  $^2J_{\text{C-F}} = 22.8$  Hz), 113.6. HRMS (ESI)  $m/z$ :  $[M+H]^+$  Calcd for  $\text{C}_{19}\text{H}_{14}\text{FN}_2\text{O}$  305.1085; Found 305.1081.

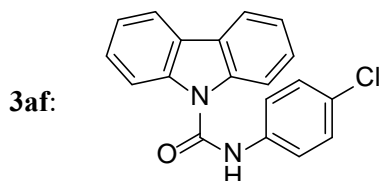

The general experimental procedure was followed to afford product **3af** as a white solid (76.3 mg, 89% yield). <sup>1</sup>H NMR (500 MHz, CDCl<sub>3</sub>): δ(ppm) = 10.70 (s, 1H), 8.24 (d, *J* = 7.5 Hz, 2H), 7.94 (d, *J* = 9.0 Hz, 2H), 7.93 (t, *J* = 9.0 Hz, 2H), 7.53 (t, *J* = 15.5 Hz, 2H), 7.48 (d, *J* = 8.5 Hz, 2H), 7.39 (t, *J* = 7.5 Hz, 2H). <sup>13</sup>C NMR (126 MHz, CDCl<sub>3</sub>): δ(ppm) = 150.1, 137.9, 137.5, 128.9, 127.6, 126.9, 124.2, 122.2, 121.6, 120.4, 113.8. HRMS (ESI) *m/z*: [*M*+H]<sup>+</sup> Calcd for C<sub>19</sub>H<sub>14</sub>ClN<sub>2</sub>O 321.0789; Found 321.0789.

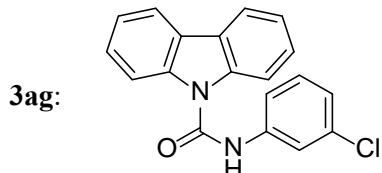

The general experimental procedure was followed to afford product **3ag** as a white solid (48.6 mg, 61% yield). <sup>1</sup>H NMR (500 MHz, DMSO-*d*<sub>6</sub>): δ(ppm) = 10.74 (s, 1H), 8.23 (d, *J* = 7.5 Hz, 2H), 7.95 (d, *J* = 8.0 Hz, 2H), 7.88–7.84 (m, 1H), 7.65 (dd, *J* = 8.0, 2.0 Hz, 1H), 7.54 (t, *J* = 8.0 Hz, 2H), 7.45 (t, *J* = 8.0 Hz, 1H), 7.39 (t, *J* = 7.5 Hz, 2H), 7.23 (dd, *J* = 8.0, 2.5 Hz, 1H). <sup>13</sup>C NMR (126 MHz, DMSO-*d*<sub>6</sub>): δ(ppm) = 150.1, 140.0, 137.8, 133.3, 130.6, 126.9, 124.2, 123.6, 122.2, 120.4, 119.5, 118.4, 113.9. HRMS (ESI) *m/z*: [*M*+H]<sup>+</sup> Calcd for C<sub>19</sub>H<sub>14</sub>ClN<sub>2</sub>O 321.0789; Found 321.0788.

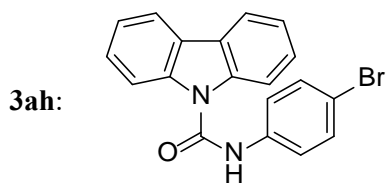

The general experimental procedure was followed to afford product **3ah** as a white solid (67.7 mg, 74% yield). <sup>1</sup>H NMR (500 MHz, DMSO-*d*<sub>6</sub>): δ(ppm) = 10.69 (s, 1H), 8.23 (d, *J* = 7.5 Hz, 2H), 7.93 (d, *J* = 8.0 Hz, 2H), 7.72–7.56 (m, 4H), 7.53 (t, *J* = 8.0 Hz, 2H), 7.39 (t, *J* = 15.0 Hz, 2H). <sup>13</sup>C NMR (126 MHz, DMSO-*d*<sub>6</sub>): δ(ppm) = 150.0, 137.9, 137.9, 131.8, 126.9, 124.2, 122.2, 122.0, 120.4, 115.6, 113.8. HRMS (ESI) *m/z*: [*M*+H]<sup>+</sup> Calcd for C<sub>19</sub>H<sub>14</sub>BrN<sub>2</sub>O 365.0284; Found 365.0281.

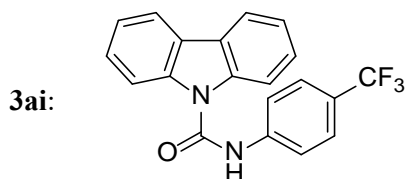

The general experimental procedure was followed to afford product **3ai** as a white solid (78.8 mg, 89% yield). <sup>1</sup>H NMR (500 MHz, DMSO-*d*<sub>6</sub>): δ(ppm) = 10.93 (s, 1H), 8.24 (d, *J* = 7.5 Hz, 2H), 7.95 (d, *J* = 8.0 Hz, 2H), 7.91 (d, *J* = 8.5 Hz, 2H), 7.79 (d, *J* = 8.5 Hz, 2H), 7.57–7.50 (m, 2H), 7.43–7.37 (m, 2H). <sup>13</sup>C NMR (126 MHz, DMSO-*d*<sub>6</sub>): δ(ppm) = 150.6, 142.7, 138.3, 127.4, 126.7 (q, <sup>3</sup>*J*<sub>C-F</sub> = 3.7 Hz), 124.8 (q, <sup>1</sup>*J*<sub>C-F</sub> = 272.2 Hz), 124.7, 124.3 (q, <sup>2</sup>*J*<sub>C-F</sub> = 33.8 Hz), 122.8, 120.9, 120.3, 114.4. HRMS (ESI) *m/z*: [*M*+H]<sup>+</sup> Calcd for C<sub>20</sub>H<sub>14</sub>F<sub>3</sub>N<sub>2</sub>O 355.1053; Found 355.1051.

**3aj:**

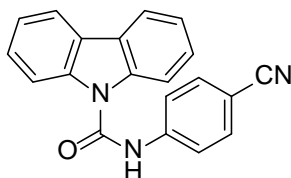

The general experimental procedure was followed to afford product **3aj** as a white solid (54.5 mg, 70% yield).  $^1\text{H}$  NMR (500 MHz, DMSO-*d*<sub>6</sub>):  $\delta$  (ppm) = 10.98 (s, 1H), 8.23 (d,  $J$  = 8.0 Hz, 2H), 7.96 (d,  $J$  = 8.5 Hz, 2H), 7.92–7.86 (m, 4H), 7.54 (t,  $J$  = 10.5 Hz, 2H), 7.40 (t,  $J$  = 15.0 Hz, 2H).  $^{13}\text{C}$  NMR (126 MHz, DMSO-*d*<sub>6</sub>):  $\delta$  (ppm) = 150.0, 143.0, 137.8, 133.4, 126.9, 124.3, 122.5, 120.4, 120.0, 119.1, 114.0, 105.5. HRMS (ESI)  $m/z$ :  $[M+H]^+$  Calcd for C<sub>20</sub>H<sub>14</sub>N<sub>3</sub>O 312.1131; Found 312.1129.

**3ak:**

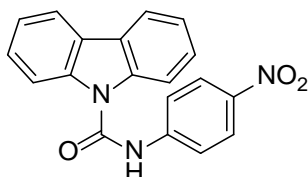

The general experimental procedure was followed to afford product **3ak** as a white solid (67.0 mg, 81% yield).  $^1\text{H}$  NMR (500 MHz, DMSO-*d*<sub>6</sub>):  $\delta$  (ppm) = 11.17 (s, 1H), 8.32 (d,  $J$  = 8.5 Hz, 2H), 8.24 (d,  $J$  = 8.0 Hz, 2H), 7.97 (d,  $J$  = 7.5 Hz, 2H), 7.94 (d,  $J$  = 9.0 Hz, 2H), 7.54 (t,  $J$  = 15.5 Hz, 2H), 7.41 (t,  $J$  = 15.0 Hz, 2H).  $^{13}\text{C}$  NMR (126 MHz, DMSO-*d*<sub>6</sub>):  $\delta$  (ppm) = 150.1, 145.0, 142.7, 137.8, 127.0, 125.1, 124.4, 122.6, 120.5, 119.6, 114.1. HRMS (ESI)  $m/z$ :  $[M+H]^+$  Calcd for C<sub>19</sub>H<sub>14</sub>N<sub>3</sub>O<sub>3</sub> 332.1030; Found 332.1033.

**3al:**

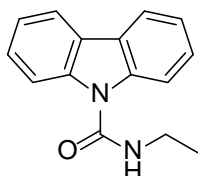

The general experimental procedure was followed to afford product **3al** as a white solid (53.0 mg, 89% yield).  $^1\text{H}$  NMR (500 MHz, CDCl<sub>3</sub>):  $\delta$  (ppm) = 7.92 (t,  $J$  = 16.0 Hz, 4H), 7.40 (dt,  $J$  = 7.0, 1.0 Hz, 2H), 7.26 (t,  $J$  = 7.5 Hz, 2H), 5.78 (s, 1H), 3.51 (dt,  $J$  = 7.0, 5.5 Hz, 2H), 1.29 (t,  $J$  = 7.0 Hz, 3H).  $^{13}\text{C}$  NMR (126 MHz, CDCl<sub>3</sub>):  $\delta$  (ppm) = 152.8, 138.3, 126.8, 125.0, 122.1, 120.2, 113.5, 35.9, 15.1. HRMS (ESI)  $m/z$ :  $[M+H]^+$  Calcd for C<sub>15</sub>H<sub>15</sub>N<sub>2</sub>O 239.1179; Found 239.1177.

**3am:**

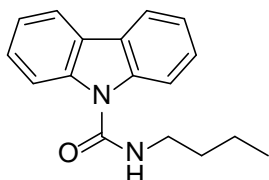

The general experimental procedure was followed to afford product **3am** as a white solid (65.9 mg, 99% yield).  $^1\text{H}$  NMR (500 MHz, DMSO-*d*<sub>6</sub>):  $\delta$  (ppm) = 8.33 (t,  $J$  = 11.0 Hz, 1H), 8.18 (d,  $J$  = 7.5 Hz, 2H), 7.93 (d,  $J$  = 8.5 Hz, 2H), 7.51 (t,  $J$  = 8.0 Hz, 2H), 7.34 (t,  $J$  = 15.0 Hz, 2H), 3.43–3.37 (m, 2H), 1.70–1.62 (m, 2H), 1.50–1.40 (m, 2H), 0.97 (t,  $J$  = 7.5 Hz, 3H).  $^{13}\text{C}$  NMR (126 MHz, DMSO-*d*<sub>6</sub>):  $\delta$  (ppm) = 152.2, 138.1, 126.5, 123.8, 121.5, 120.2, 113.5, 40.1, 31.2, 19.8, 13.7. HRMS (ESI)  $m/z$ :  $[M+H]^+$  Calcd for C<sub>17</sub>H<sub>19</sub>N<sub>2</sub>O 267.1492; Found 267.1493.

**3an:**

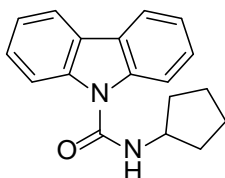

The general experimental procedure was followed to afford product **3an** as a white solid (63.3 mg, 92% yield).  $^1\text{H}$  NMR (500 MHz,  $\text{CDCl}_3$ ):  $\delta$  (ppm) = 7.98 (d,  $J$  = 7.5 Hz, 2H), 7.95 (d,  $J$  = 8.5 Hz, 2H), 7.45 (t,  $J$  = 8.5 Hz, 2H), 7.31 (t,  $J$  = 7.5 Hz, 2H), 5.76 (d,  $J$  = 7.5 Hz, 1H), 4.44–4.30 (m, 1H), 2.23–2.10 (m, 2H), 1.83–1.68 (m, 4H), 1.67–1.57 (m, 2H).  $^{13}\text{C}$  NMR (126 MHz,  $\text{CDCl}_3$ ):  $\delta$  (ppm) = 152.3, 138.4, 126.9, 125.0, 122.1, 120.2, 113.4, 52.9, 33.3, 23.8. HRMS (ESI)  $m/z$ :  $[M+H]^+$  Calcd for  $\text{C}_{18}\text{H}_{19}\text{N}_2\text{O}$  279.1492; Found 279.1491.

**3ao:**

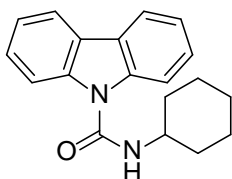

The general experimental procedure was followed to afford product **3ao** as a white solid (40.9 mg, 56% yield).  $^1\text{H}$  NMR (500 MHz,  $\text{CDCl}_3$ ):  $\delta$  (ppm) = 8.00 (dd,  $J$  = 12.0, 7.5 Hz, 4H), 7.47 (t,  $J$  = 8.0 Hz, 2H), 7.32 (t,  $J$  = 7.5 Hz, 2H), 5.66 (d,  $J$  = 7.5 Hz, 1H), 4.06–3.95 (m, 1H), 2.23–2.12 (m, 2H), 1.86–1.76 (m, 2H), 1.74–1.65 (m, 1H), 1.55–1.43 (m, 2H), 1.42–1.32 (m, 2H), 1.31–1.20 (m, 1H).  $^{13}\text{C}$  NMR (126 MHz,  $\text{CDCl}_3$ ):  $\delta$  (ppm) = 151.9, 138.5, 126.9, 125.1, 122.2, 120.3, 113.5, 50.1, 33.4, 25.6, 25.0. HRMS (ESI)  $m/z$ :  $[M+H]^+$  Calcd for  $\text{C}_{19}\text{H}_{21}\text{N}_2\text{O}$  293.1648; Found 293.1647.

**3ap:**

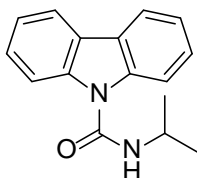

The general experimental procedure was followed to afford product **3ap** as a white solid (43.3mg, 69% yield).  $^1\text{H}$  NMR (500 MHz,  $\text{CDCl}_3$ ):  $\delta$  (ppm) = 8.29 (d,  $J$  = 7.5 Hz, 1H), 8.19 (d,  $J$  = 7.5 Hz, 2H), 7.90 (d,  $J$  = 8.5 Hz, 2H), 7.50 (t,  $J$  = 7.5 Hz, 2H), 7.33 (t,  $J$  = 7.5 Hz, 2H), 4.15–4.05 (m, 1H), 1.31 (d,  $J$  = 6.5 Hz, 6H).  $^{13}\text{C}$  NMR (126 MHz,  $\text{CDCl}_3$ ):  $\delta$  (ppm) = 151.3, 138.0, 126.5, 123.7, 121.5, 120.3, 113.5, 42.7, 22.3. HRMS (ESI)  $m/z$ :  $[M+H]^+$  Calcd for  $\text{C}_{16}\text{H}_{17}\text{N}_2\text{O}$  253.1335; Found 253.1334.

**3ar:**

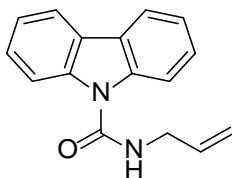

The general experimental procedure was followed to afford product **3ar** as a white solid (58.9 mg, 94% yield).  $^1\text{H}$  NMR (500 MHz,  $\text{CDCl}_3$ ):  $\delta$  (ppm) = 8.54 (s, 1H), 8.19 (d,  $J$  = 8.0 Hz, 2H), 7.96 (d,  $J$  = 6.0 Hz, 2H), 7.51 (t,  $J$  = 8.0 Hz, 2H), 7.34 (t,  $J$  = 7.5 Hz, 2H), 6.10–6.00 (m, 1H), 5.33 (d,  $J$  = 17.0 Hz, 1H), 5.20 (d,  $J$  = 10.5 Hz, 1H), 4.04 (s, 2H).  $^{13}\text{C}$  NMR (126 MHz,  $\text{CDCl}_3$ ):  $\delta$  (ppm) = 152.2, 138.0, 135.0, 126.6, 123.9, 121.7, 120.3, 116.0, 113.7, 42.8. HRMS (ESI)  $m/z$ :  $[M+H]^+$  Calcd for  $\text{C}_{16}\text{H}_{15}\text{N}_2\text{O}$  251.1179; Found 251.1172.

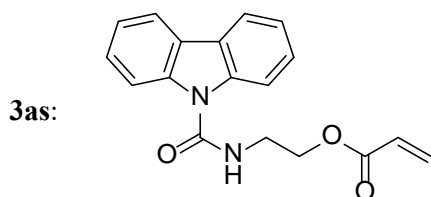

The general experimental procedure was followed to afford product **3as** as a white solid (56.0 mg, 73% yield). <sup>1</sup>H NMR (500 MHz, CDCl<sub>3</sub>): δ (ppm) = 8.53 (s, 1H), 8.19 (d, *J* = 8.0 Hz, 2H), 7.94 (d, *J* = 8.5 Hz, 2H), 7.49 (t, *J* = 8.0 Hz, 2H), 7.34 (t, *J* = 7.5 Hz, 2H), 6.46–6.38 (m, 1H), 6.29–6.20 (m, 1H), 6.02–5.96 (m, 1H), 4.41 (t, *J* = 5.5 Hz, 2H), 3.75–3.65 (m, 2H). <sup>13</sup>C NMR (126 MHz, CDCl<sub>3</sub>): δ (ppm) = 165.6, 152.3, 137.9, 131.9, 128.4, 126.6, 123.9, 121.7, 120.3, 113.6, 62.7, 39.4. HRMS (ESI) *m/z*: [*M*+H]<sup>+</sup> Calcd for C<sub>18</sub>H<sub>17</sub>N<sub>2</sub>O<sub>3</sub> 309.1234; Found 309.1234.

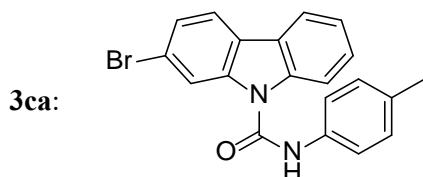

The general experimental procedure was followed to afford product **3ca** as a white solid (58.09 mg, 61% yield). <sup>1</sup>H NMR (500 MHz, DMSO-*d*<sub>6</sub>): δ (ppm) = 10.56 (s, 1H), 8.25 (d, *J* = 7.5 Hz, 1H), 8.21 (d, *J* = 8.0 Hz, 1H), 8.07 (s, 1H), 7.94–7.86 (m, 1H), 7.60–7.49 (m, 4H), 7.43–7.35 (m, 1H), 7.23 (d, *J* = 7.5 Hz, 2H), 2.32 (s, 3H). <sup>13</sup>C NMR (126 MHz, DMSO-*d*<sub>6</sub>): δ (ppm) = 149.6, 138.8, 138.1, 135.6, 133.2, 129.4, 127.3, 124.8, 123.3, 123.2, 122.4, 122.2, 120.6, 120.2, 119.3, 116.4, 113.8, 20.5. HRMS (ESI) *m/z*: [*M*+H]<sup>+</sup> Calcd for C<sub>20</sub>H<sub>16</sub>N<sub>2</sub>BrO 379.0441; Found 379.0439.

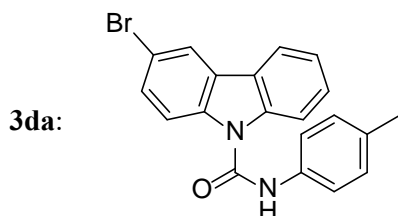

The general experimental procedure was followed to afford product **3da** as a white solid (71.2 mg, 70% yield). <sup>1</sup>H NMR (500 MHz, DMSO-*d*<sub>6</sub>): δ (ppm) = 10.51 (s, 1H), 8.51 (d, *J* = 3.0 Hz, 1H), 8.29 (d, *J* = 8.0 Hz, 1H), 7.91 (d, *J* = 8.5 Hz, 1H), 7.87 (dd, *J* = 9.0, 2.5 Hz, 1H), 7.66 (d, *J* = 8.5 Hz, 1H), 7.61–7.53 (m, 3H), 7.42–7.36 (m, 1H), 7.22 (d, *J* = 8.0 Hz, 2H), 2.31 (s, 3H). <sup>13</sup>C NMR (126 MHz, DMSO-*d*<sub>6</sub>): δ (ppm) = 149.6, 138.3, 136.9, 135.7, 133.1, 129.4, 129.2, 127.6, 126.1, 123.1, 122.9, 122.3, 121.0, 120.1, 115.7, 114.2, 113.7, 20.5. HRMS (ESI) *m/z*: [*M*+H]<sup>+</sup> Calcd for C<sub>20</sub>H<sub>16</sub>N<sub>2</sub>BrO 379.0441; Found 379.0439.

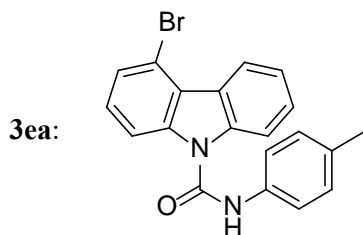

The general experimental procedure was followed to afford product **3ea** as a white solid (84.4 mg, 89% yield). <sup>1</sup>H NMR (500 MHz, DMSO-*d*<sub>6</sub>): δ (ppm) = 10.68 (s, 1H), 8.74 (d, *J* = 8.0 Hz,

1H), 7.96 (d,  $J = 8.0$  Hz, 2H), 7.64–7.57 (m, 4H), 7.47 (t,  $J = 8.0$  Hz, 2H), 7.24 (d,  $J = 8.0$  Hz, 2H), 2.32 (s, 3H).  $^{13}\text{C}$  NMR (126 MHz, DMSO- $d_6$ ):  $\delta$  (ppm) = 149.3, 139.4, 138.3, 135.6, 133.3, 129.4, 127.7, 127.5, 125.9, 123.0, 122.0, 121.9, 121.8, 120.1, 115.4, 113.3, 112.7, 20.5. HRMS (ESI)  $m/z$ :  $[M+H]^+$  Calcd for  $\text{C}_{20}\text{H}_{16}\text{N}_2\text{BrO}$  379.0441; Found 379.0439.

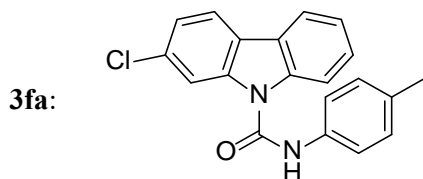

The general experimental procedure was followed to afford product **3fa** as a white solid (76.2 mg, 91% yield).  $^1\text{H}$  NMR (500 MHz, DMSO- $d_6$ ):  $\delta$  (ppm) = 10.55 (s, 1H), 8.27 (t,  $J = 5.0$  Hz, 2H), 7.92–7.88 (m, 2H), 7.61–7.52 (m, 3H), 7.45–7.32 (m, 2H), 7.23 (d,  $J = 8.0$  Hz, 2H), 2.32 (s, 3H).  $^{13}\text{C}$  NMR (126 MHz, DMSO- $d_6$ ):  $\delta$  (ppm) = 149.6, 138.5, 138.3, 135.6, 133.2, 131.0, 129.4, 127.2, 123.3, 122.9, 122.4, 122.2, 121.8, 120.6, 120.2, 113.8, 113.6, 20.5. HRMS (ESI)  $m/z$ :  $[M+H]^+$  Calcd for  $\text{C}_{20}\text{H}_{16}\text{N}_2\text{ClO}$  335.0946; Found 335.0942.

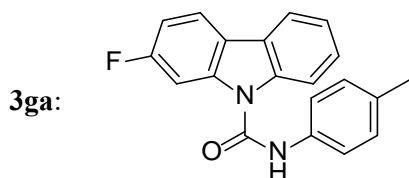

The general experimental procedure was followed to afford product **3ga** as a white solid (70.5 mg, 89% yield).  $^1\text{H}$  NMR (500 MHz, DMSO- $d_6$ ):  $\delta$  (ppm) = 10.54 (s, 1H), 8.27–8.21 (m, 2H), 7.90 (d,  $J = 8.5$  Hz, 1H), 7.68 (d,  $J = 10.0$  Hz, 1H), 7.60 (d,  $J = 8.0$  Hz, 2H), 7.53–7.49 (m, 1H), 7.41–7.35 (m, 1H), 7.28–7.17 (m, 3H), 2.31 (s, 3H).  $^{13}\text{C}$  NMR (126 MHz, DMSO- $d_6$ ):  $\delta$  (ppm) = 161.4 (d,  $^1J_{\text{C-F}} = 241.9$  Hz), 149.8, 138.7 (d,  $^3J_{\text{C-F}} = 12.6$  Hz), 138.4, 135.7, 133.2, 129.4, 126.5, 123.6, 122.3, 121.9 (d,  $^3J_{\text{C-F}} = 12.6$  Hz), 120.7, 120.3, 120.2, 113.7, 109.9 (d,  $^2J_{\text{C-F}} = 23.9$  Hz), 101.0 (d,  $^2J_{\text{C-F}} = 27.7$  Hz), 20.5. HRMS (ESI)  $m/z$ :  $[M+H]^+$  Calcd for  $\text{C}_{20}\text{H}_{16}\text{FN}_2\text{O}$  319.1241; Found 319.1241.

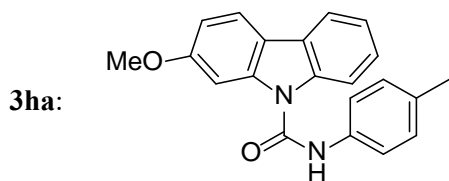

The general experimental procedure was followed to afford product **3ha** as a white solid (58.1 mg, 70% yield).  $^1\text{H}$  NMR (500 MHz,  $\text{CDCl}_3$ ):  $\delta$  (ppm) = 7.76 (d,  $J = 8.0$  Hz, 2H), 7.67 (d,  $J = 8.5$  Hz, 1H), 7.56 (s, 1H), 7.47 (s, 1H), 7.40 (d,  $J = 8.0$  Hz, 2H), 7.28 (t,  $J = 7.5$  Hz, 1H), 7.20 (t,  $J = 7.5$  Hz, 1H), 7.14 (d,  $J = 8.0$  Hz, 2H), 6.80 (d,  $J = 8.5$  Hz, 1H), 3.77 (s, 3H), 2.32 (s, 3H).  $^{13}\text{C}$  NMR (126 MHz,  $\text{CDCl}_3$ ):  $\delta$  (ppm) = 159.6, 150.4, 139.7, 137.8, 134.6, 134.5, 129.9, 125.6, 125.5, 122.6, 120.6, 120.2, 119.6, 118.4, 112.9, 111.1, 98.2, 55.7, 21.0. HRMS (ESI)  $m/z$ :  $[M+H]^+$  Calcd for  $\text{C}_{21}\text{H}_{19}\text{N}_2\text{O}_2$  331.1441; Found 331.1439.



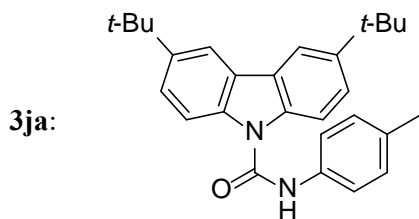

The general experimental procedure was followed to afford product **3ja** as a white solid (89.0 mg, 87% yield).  $^1\text{H}$  NMR (500 MHz,  $\text{CDCl}_3$ ):  $\delta$  (ppm) = 8.10–8.02 (m, 2H), 7.96 (d,  $J$  = 8.5 Hz, 2H), 7.55 (s, 1H), 7.53 (d,  $J$  = 2.0 Hz, 1H), 7.51 (d,  $J$  = 1.5 Hz, 1H), 7.48 (d,  $J$  = 9.0 Hz, 2H), 7.21 (d,  $J$  = 8.0 Hz, 2H), 2.38 (s, 3H), 1.48 (s, 18H).  $^{13}\text{C}$  NMR (126 MHz,  $\text{CDCl}_3$ ):  $\delta$  (ppm) = 150.5, 145.7, 136.7, 134.8, 134.3, 129.9, 125.5, 124.8, 120.1, 116.4, 113.3, 34.9, 31.9, 21.0. HRMS (ESI)  $m/z$ :  $[M+H]^+$  Calcd for  $\text{C}_{28}\text{H}_{33}\text{N}_2\text{O}$  413.2587; Found 413.2581.

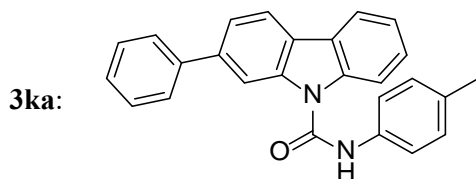

The general experimental procedure was followed to afford product **3ka** as a white solid (65.9 mg, 70% yield).  $^1\text{H}$  NMR (500 MHz,  $\text{CDCl}_3$ ):  $\delta$  (ppm) = 8.31–8.28 (m, 1H), 8.03 (t,  $J$  = 10.0 Hz, 2H), 7.98 (d,  $J$  = 8.5 Hz, 1H), 7.68 (d,  $J$  = 7.5 Hz, 2H), 7.59 (d,  $J$  = 8.0 Hz, 1H), 7.56 (s, 1H), 7.49–7.42 (m, 5H), 7.39–7.34 (m, 2H), 7.23 (d,  $J$  = 8.0 Hz, 2H), 2.38 (s, 3H).  $^{13}\text{C}$  NMR (126 MHz,  $\text{CDCl}_3$ ):  $\delta$  (ppm) = 150.4, 141.4, 140.6, 139.1, 138.6, 134.7, 134.6, 130.0, 129.0, 127.6, 127.5, 127.2, 125.3, 124.4, 122.8, 122.2, 120.6, 120.5, 120.3, 113.4, 112.4, 21.0. HRMS (ESI)  $m/z$ :  $[M+H]^+$  Calcd for  $\text{C}_{26}\text{H}_{21}\text{N}_2\text{O}$  377.1648; Found 377.1647.

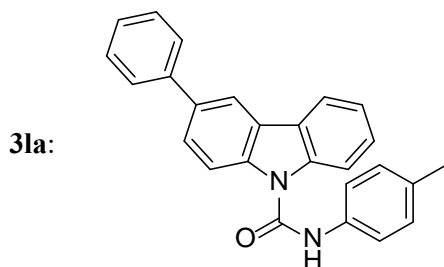

The general experimental procedure was followed to afford product **3la** as a white solid (73.3 mg, 78% yield).  $^1\text{H}$  NMR (500 MHz,  $\text{CDCl}_3$ ):  $\delta$  (ppm) = 8.18 (d,  $J$  = 1.5 Hz, 1H), 8.05 (t,  $J$  = 8.5 Hz, 2H), 8.01 (d,  $J$  = 8.5 Hz, 1H), 7.71–7.67 (m, 3H), 7.55 (s, 1H), 7.51–7.45 (m, 5H), 7.41–7.33 (m, 2H), 7.24 (d,  $J$  = 8.5 Hz, 2H), 2.39 (s, 3H).  $^{13}\text{C}$  NMR (126 MHz,  $\text{CDCl}_3$ ):  $\delta$  (ppm) = 150.3, 141.2, 138.7, 137.7, 136.0, 134.7, 134.6, 130.0, 129.0, 127.43, 127.36, 127.2, 126.5, 125.9, 125.4, 122.8, 120.5, 120.2, 118.7, 113.9, 113.7, 21.1. HRMS (ESI)  $m/z$ :  $[M+H]^+$  Calcd for  $\text{C}_{26}\text{H}_{21}\text{N}_2\text{O}$  377.1648; Found 377.1645.

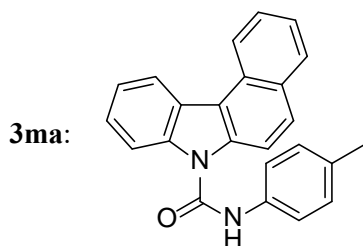

The general experimental procedure was followed to afford product **3ma** as a white solid (73.6 mg, 84% yield). <sup>1</sup>H NMR (500 MHz, CDCl<sub>3</sub>): δ(ppm) = 8.75 (d, *J* = 8.0 Hz, 1H), 8.54 (d, *J* = 8.0 Hz, 1H), 8.23 (d, *J* = 9.0 Hz, 1H), 8.07 (d, *J* = 8.5 Hz, 1H), 8.0 (d, *J* = 8.0 Hz, 1H), 7.90 (d, *J* = 9.0 Hz, 1H), 7.71 (t, *J* = 7.5 Hz, 1H), 7.60 (s, 1H), 7.56–7.43 (m, 5H), 7.26–7.22 (m, 2H), 2.38 (s, 3H). <sup>13</sup>C NMR (126 MHz, CDCl<sub>3</sub>): δ(ppm) = 149.9, 137.6, 136.4, 134.9, 134.5, 130.4, 130.0, 129.4, 129.3, 128.5, 127.4, 125.9, 125.8, 124.4, 123.6, 123.0, 122.6, 120.2, 117.9, 113.9, 113.2, 21.1. HRMS (ESI) *m/z*: [*M*+H]<sup>+</sup> Calcd for C<sub>24</sub>H<sub>19</sub>N<sub>2</sub>O 351.1492; Found 351.1491.

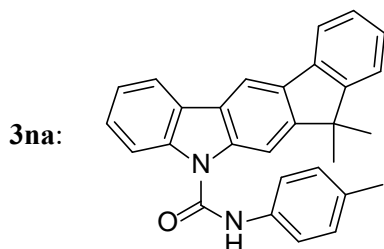

The general experimental procedure was followed to afford product **3na** as a white solid (102.05 mg, 98% yield). <sup>1</sup>H NMR (500 MHz, CDCl<sub>3</sub>): δ(ppm) = 8.11 (d, *J* = 2.5 Hz, 1H), 8.07 (d, *J* = 2.0 Hz, 1H), 7.97 (d, *J* = 7.5 Hz, 1H), 7.79 (dd, *J* = 8.0, 2.0 Hz, 1H), 7.75 (d, *J* = 7.5 Hz, 1H), 7.54 (s, 1H), 7.45 (d, *J* = 7.5 Hz, 2H), 7.41 (d, *J* = 7.5 Hz, 1H), 7.36 (t, *J* = 7.5 Hz, 2H), 7.31–7.25 (m, 2H), 7.21–7.15 (m, 2H), 2.33 (s, 3H), 1.50 (s, 6H). <sup>13</sup>C NMR (126 MHz, CDCl<sub>3</sub>): δ(ppm) = 154.0, 153.8, 150.4, 139.1, 138.6, 138.2, 134.7, 134.6, 134.5, 129.9, 127.2, 127.0, 126.6, 125.7, 124.5, 122.8, 122.6, 120.4, 120.1, 119.8, 113.0, 111.0, 108.5, 47.1, 27.8, 21.0. HRMS (ESI) *m/z*: [*M*+H]<sup>+</sup> Calcd for C<sub>29</sub>H<sub>25</sub>N<sub>2</sub>O 417.1961; Found 417.1967.

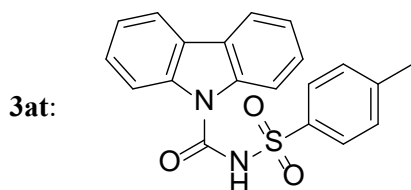

The general experimental procedure was followed to afford product **3at** as a white solid (71.5 mg, 79% yield). <sup>1</sup>H NMR (500 MHz, DMSO-*d*<sub>6</sub>): δ(ppm) = 8.72 (d, *J* = 8.5 Hz, 2H), 8.06 (d, *J* = 7.5 Hz, 2H), 7.84 (d, *J* = 8.0 Hz, 2H), 7.40 (t, *J* = 7.5 Hz, 2H), 7.26–7.22 (m, 4H), 2.32 (s, 3H). <sup>13</sup>C NMR (126 MHz, DMSO-*d*<sub>6</sub>): δ(ppm) = 156.3, 143.0, 139.9, 139.3, 128.4, 127.0, 126.1, 124.2, 121.1, 119.3, 117.1, 21.0. HRMS (ESI) *m/z*: [*M*+H]<sup>+</sup> Calcd for C<sub>20</sub>H<sub>17</sub>N<sub>2</sub>O<sub>3</sub>S 365.0954; Found 365.0957.

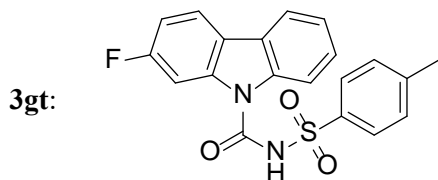

The general experimental procedure was followed to afford product **3gt** as a white solid (40.0 mg, 40% yield). <sup>1</sup>H NMR (500 MHz, DMSO-*d*<sub>6</sub>): δ(ppm) = 8.66 (d, *J* = 8.5 Hz, 1H), 8.49 (dd, *J* = 12.0, 2.5 Hz, 1H), 8.08 (dd, *J* = 8.5, 6.0 Hz, 1H), 8.04 (dd, *J* = 8.0, 1.5 Hz, 1H), 7.81 (dd, *J* = 6.0, 1.5 Hz, 1H), 7.37 (ddd, *J* = 8.5, 7.0, 1.5 Hz, 1H), 7.27–7.21 (m, 3H), 7.09 (td, *J* = 9.0, 3.0 Hz, 1H), 2.32 (s, 3H). <sup>13</sup>C NMR (126 MHz, DMSO-*d*<sub>6</sub>): δ(ppm) = 161.1 (d, <sup>1</sup>*J*<sub>C-F</sub> = 238.1 Hz), 155.9, 142.8, 139.86 (d, <sup>3</sup>*J*<sub>C-F</sub> = 11.3 Hz), 139.88, 139.81, 128.3, 126.9, 125.7, 123.6, 121.3,

120.7, 120.4 (d,  $^3J_{C-F} = 10.1$  Hz), 119.1, 116.9, 108.7 (d,  $^2J_{C-F} = 25.2$  Hz), 103.8 (d,  $^2J_{C-F} = 29.0$  Hz), 20.9. HRMS (ESI)  $m/z$ :  $[M+H]^+$  Calcd for  $C_{20}H_{16}FN_2O_3S$  383.0860; Found 383.0859.

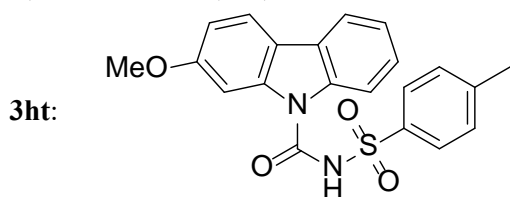

The general experimental procedure was followed to afford product **3ht** as a white solid (87.0 mg, 88% yield).  $^1H$  NMR (500 MHz, DMSO- $d_6$ ):  $\delta$  (ppm) = 8.65 (d,  $J = 8.5$  Hz, 1H), 8.29 (s, 1H), 7.93 (t,  $J = 8.0$  Hz, 2H), 7.79 (d,  $J = 8.0$  Hz, 2H), 7.29 (t,  $J = 7.5$  Hz, 1H), 7.24 (d,  $J = 8.0$  Hz, 2H), 7.18 (t,  $J = 7.5$  Hz, 1H), 6.85 (dd,  $J = 8.5, 2.5$  Hz, 1H), 3.79 (s, 3H), 2.32 (s, 3H).  $^{13}C$  NMR (126 MHz, DMSO- $d_6$ ):  $\delta$  (ppm) = 158.5, 156.2, 143.1, 140.7, 139.8, 139.4, 128.4, 126.9, 124.7, 124.3, 121.0, 119.8, 118.4, 117.8, 116.9, 109.2, 101.5, 55.2, 20.9. HRMS (ESI)  $m/z$ :  $[M+H]^+$  Calcd for  $C_{21}H_{19}N_2O_4S$  395.1060; Found 395.1058.

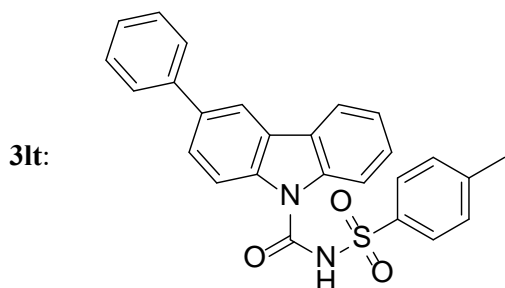

The general experimental procedure was followed to afford product **3lt** as a white solid (95.8 mg, 87% yield).  $^1H$  NMR (500 MHz, DMSO- $d_6$ ):  $\delta$  (ppm) = 8.78 (d,  $J = 8.5$  Hz, 1H), 8.72 (d,  $J = 8.0$  Hz, 1H), 8.42 (s, 1H), 8.20 (d,  $J = 7.5$  Hz, 1H), 7.85 (d,  $J = 7.5$  Hz, 2H), 7.81 (d,  $J = 8.0$  Hz, 2H), 7.73 (dd,  $J = 8.5, 2.0$  Hz, 1H), 7.49 (t,  $J = 8.0$  Hz, 2H), 7.42 (t,  $J = 8.0$  Hz, 1H), 7.35 (t,  $J = 7.5$  Hz, 1H), 7.29–7.24 (m, 3H), 2.33 (s, 3H).  $^{13}C$  NMR (126 MHz, DMSO- $d_6$ ):  $\delta$  (ppm) = 156.2, 143.0, 140.7, 139.9, 139.8, 138.9, 133.2, 129.0, 128.4, 127.0, 126.8, 126.8, 126.3, 124.9, 124.8, 124.3, 121.2, 119.6, 117.5, 117.3, 117.1, 21.0. HRMS (ESI)  $m/z$ :  $[M+H]^+$  Calcd for  $C_{26}H_{21}N_2O_3S$  441.1267; Found 441.1270.

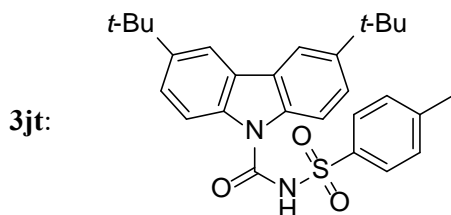

The general experimental procedure was followed to afford product **3jt** as a white solid (114.3 mg, 96% yield).  $^1H$  NMR (500 MHz,  $CDCl_3$ ):  $\delta$  (ppm) = 8.54 (d,  $J = 9.0$  Hz, 2H), 8.09 (s, 2H), 7.79 (d,  $J = 8.5$  Hz, 2H), 7.43–7.38 (dt,  $J = 9.0, 2.0$  Hz, 2H), 7.22 (d,  $J = 8.0$  Hz, 2H), 2.32 (s, 3H), 1.39 (s, 18H).  $^{13}C$  NMR (126 MHz,  $CDCl_3$ ):  $\delta$  (ppm) = 156.3, 143.3, 143.2, 139.7, 137.7, 128.3, 126.9, 124.2, 123.4, 116.5, 115.4, 34.4, 31.8, 21.0. HRMS (ESI)  $m/z$ :  $[M+H]^+$  Calcd for  $C_{28}H_{33}N_2O_3S$  477.2206; Found 477.2201.

### **3. Copies of NMR spectra**

**See the next page!**

8.036  
8.020  
7.497  
7.483  
7.468  
7.370  
7.355  
7.340  
7.260  
7.230  
7.215

-2.376

<sup>1</sup>H NMR (500 MHz, CDCl<sub>3</sub>)

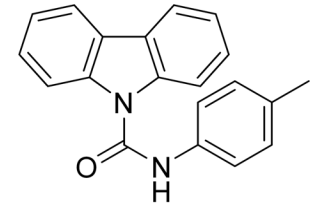

**3aa**

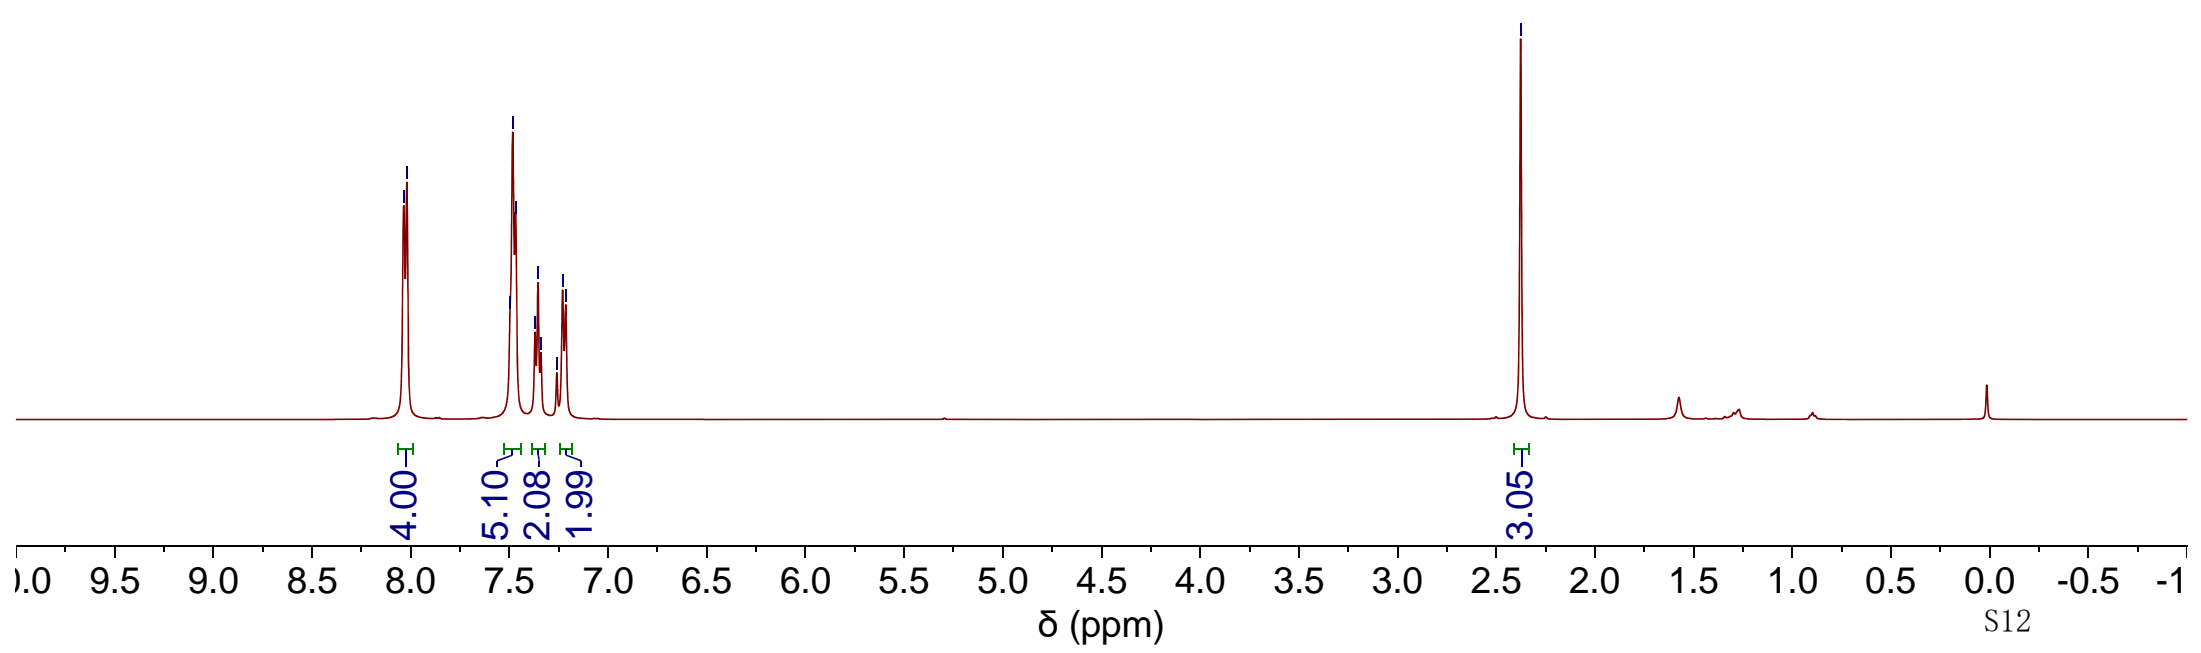

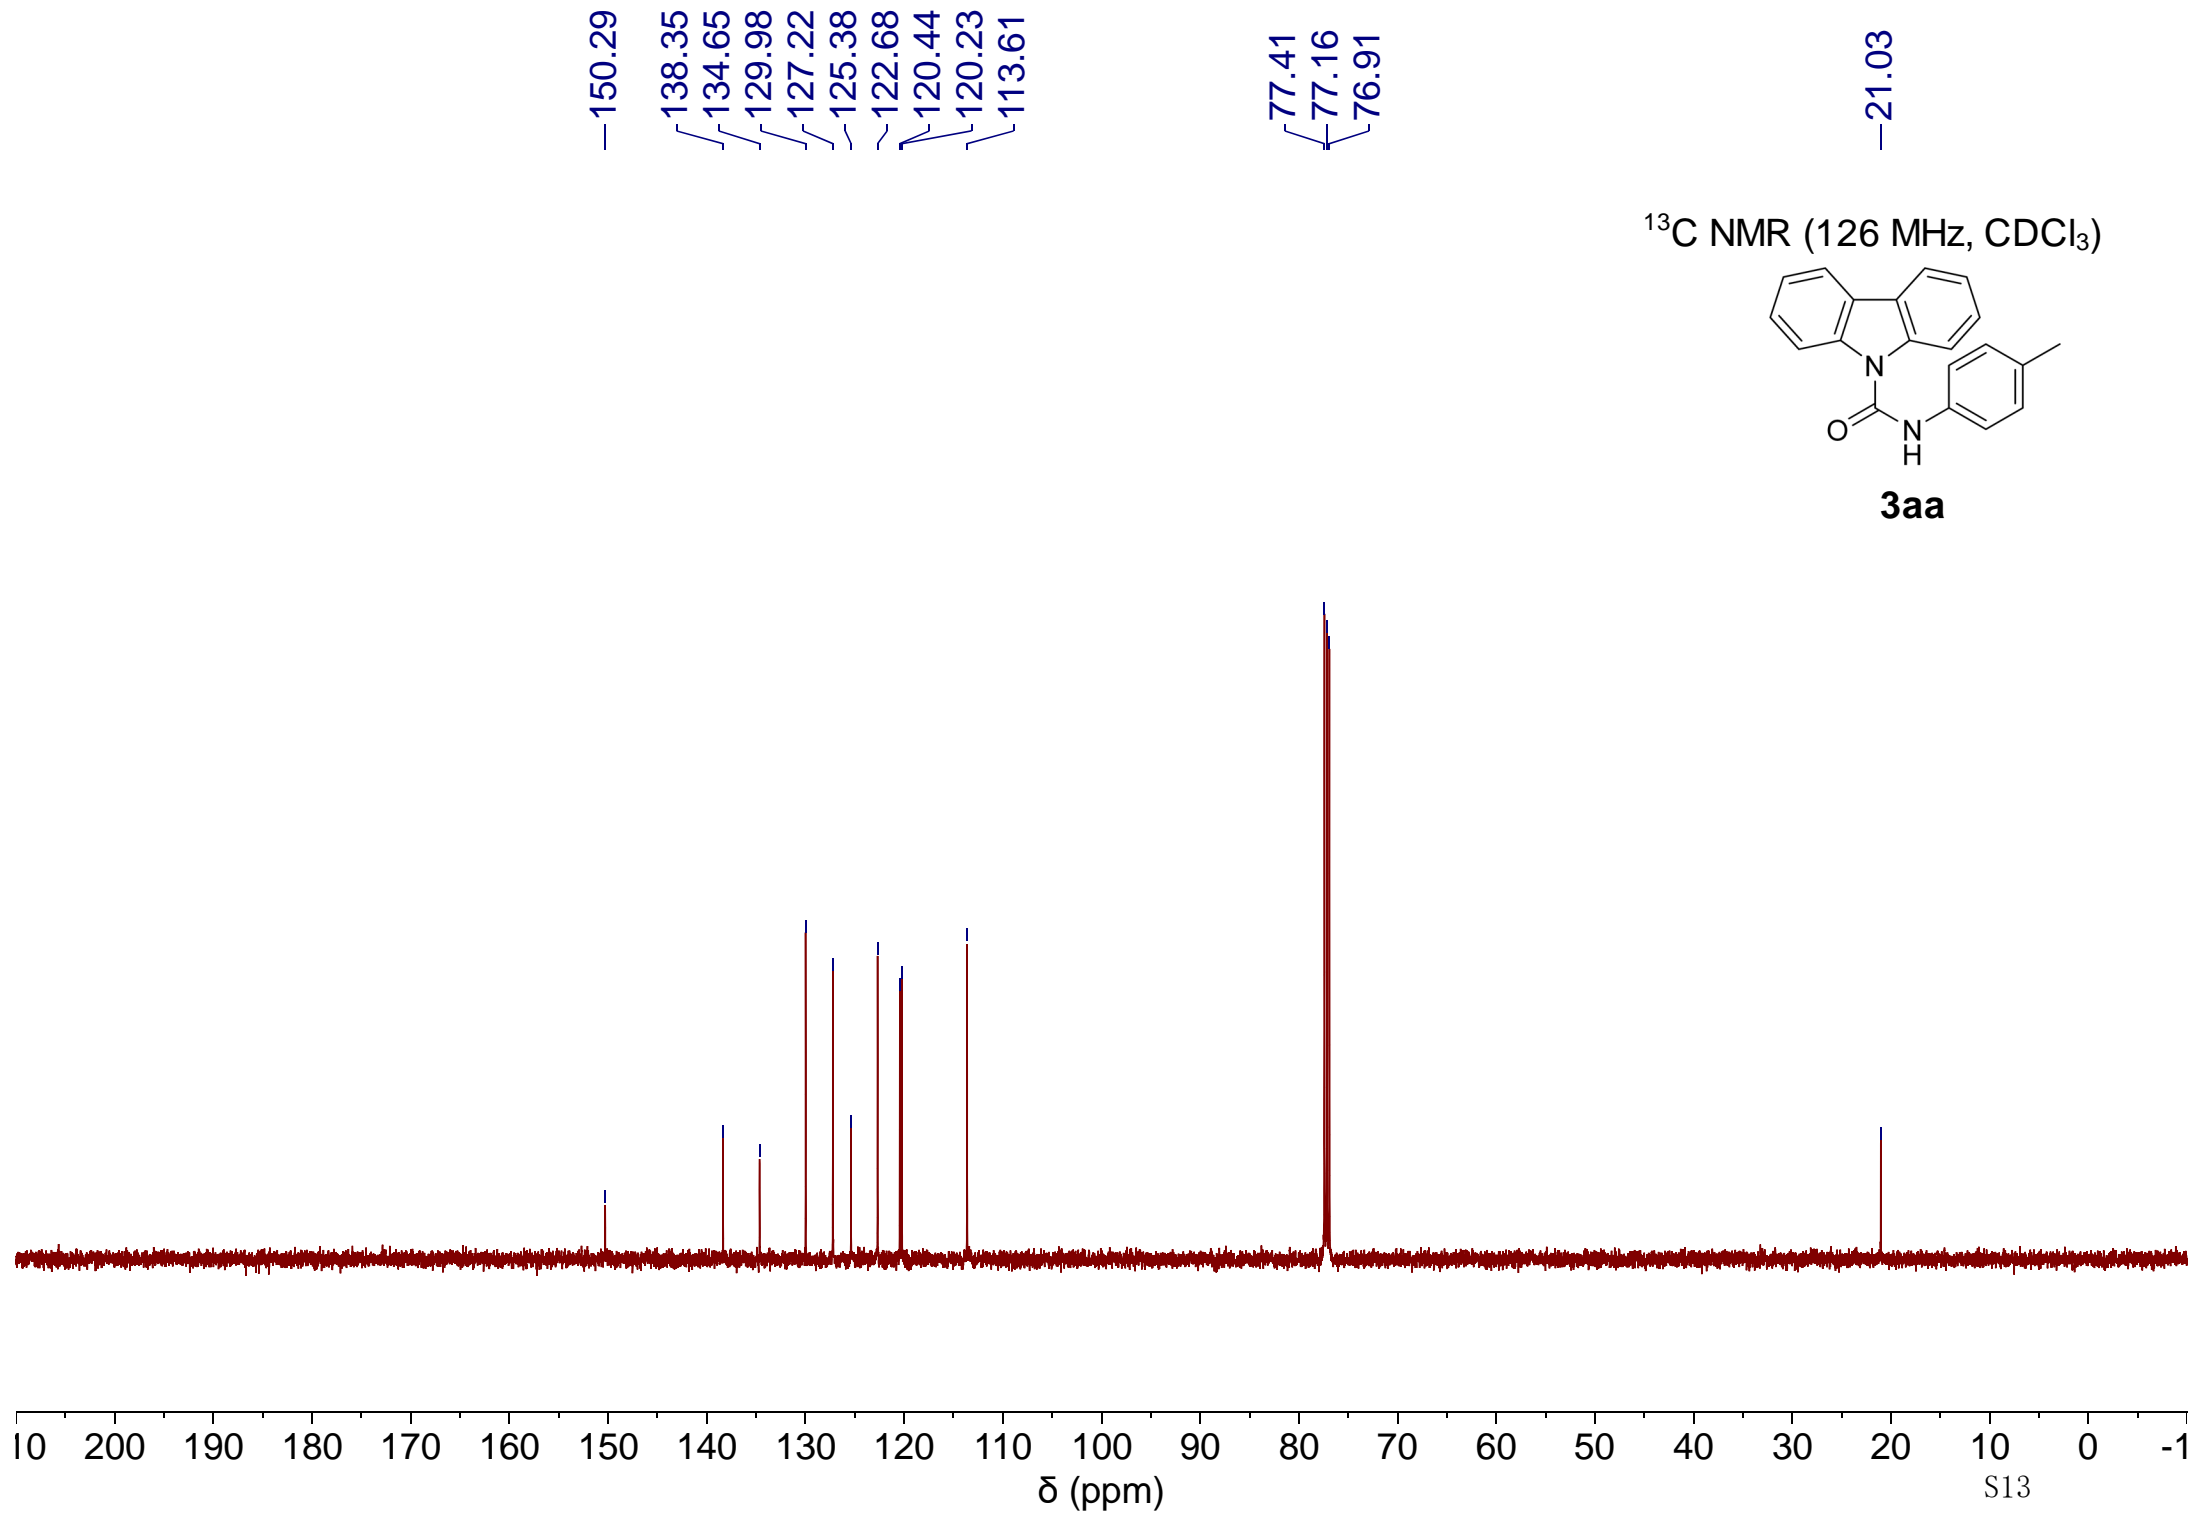

7.908  
7.891  
7.881  
7.866  
7.551  
7.388  
7.385  
7.380  
7.372  
7.357  
7.355  
7.329  
7.313  
7.260  
7.245  
7.229  
7.212  
7.203  
6.963  
6.948

—2.348

<sup>1</sup>H NMR (500 MHz, CDCl<sub>3</sub>)

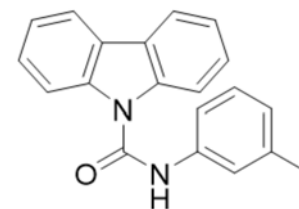

**3ab**

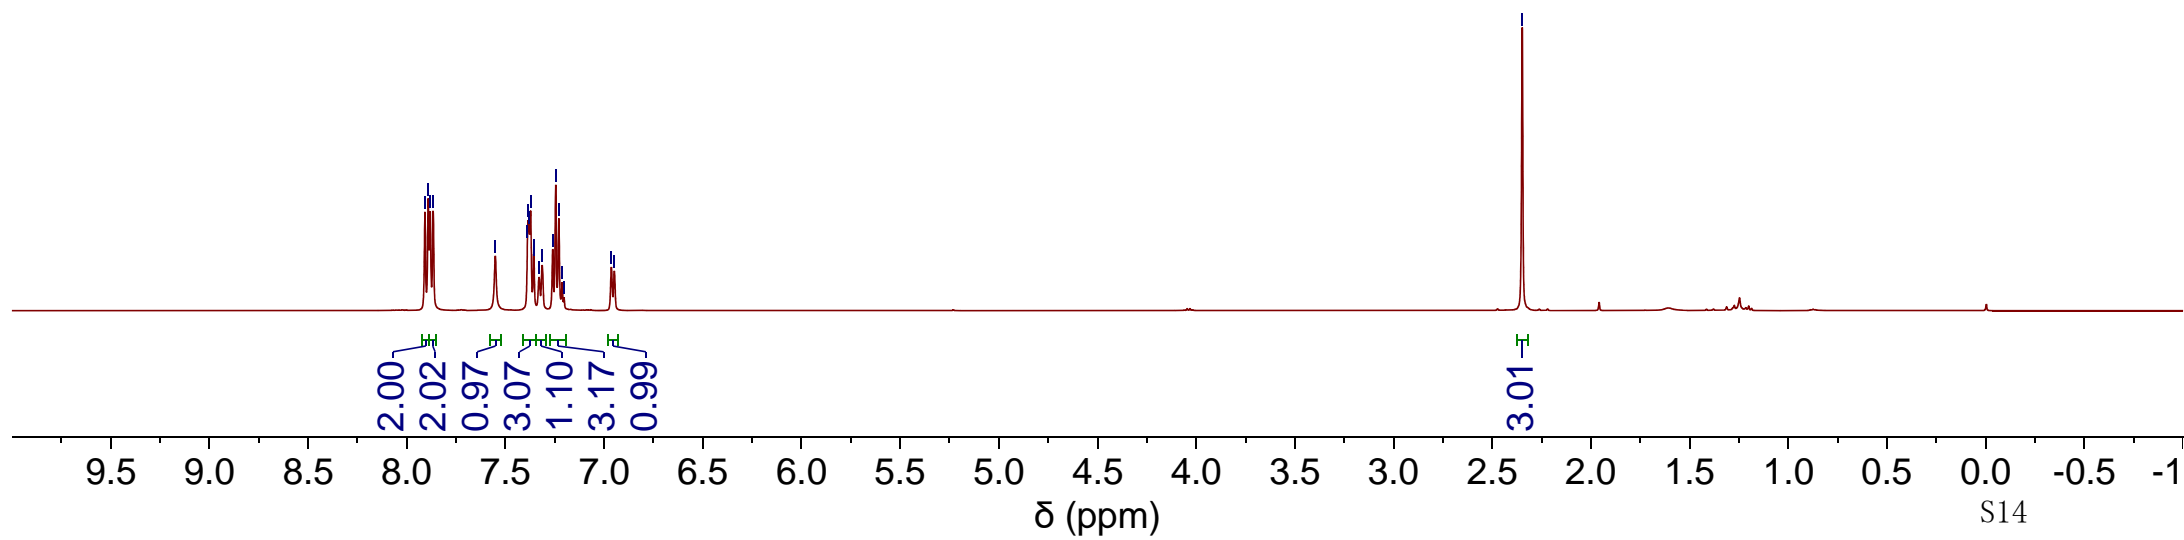

150.16  
139.37  
138.13  
137.15  
129.19  
127.02  
125.56  
125.21  
122.55  
120.60  
120.24  
117.07  
113.50

77.41  
77.16  
76.90

21.61

<sup>13</sup>C NMR (126 MHz, CDCl<sub>3</sub>)

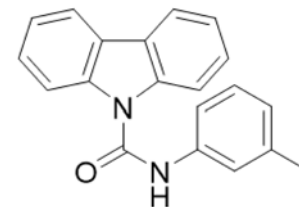

**3ab**

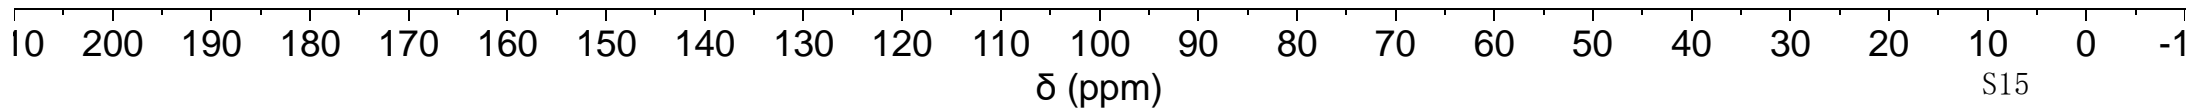



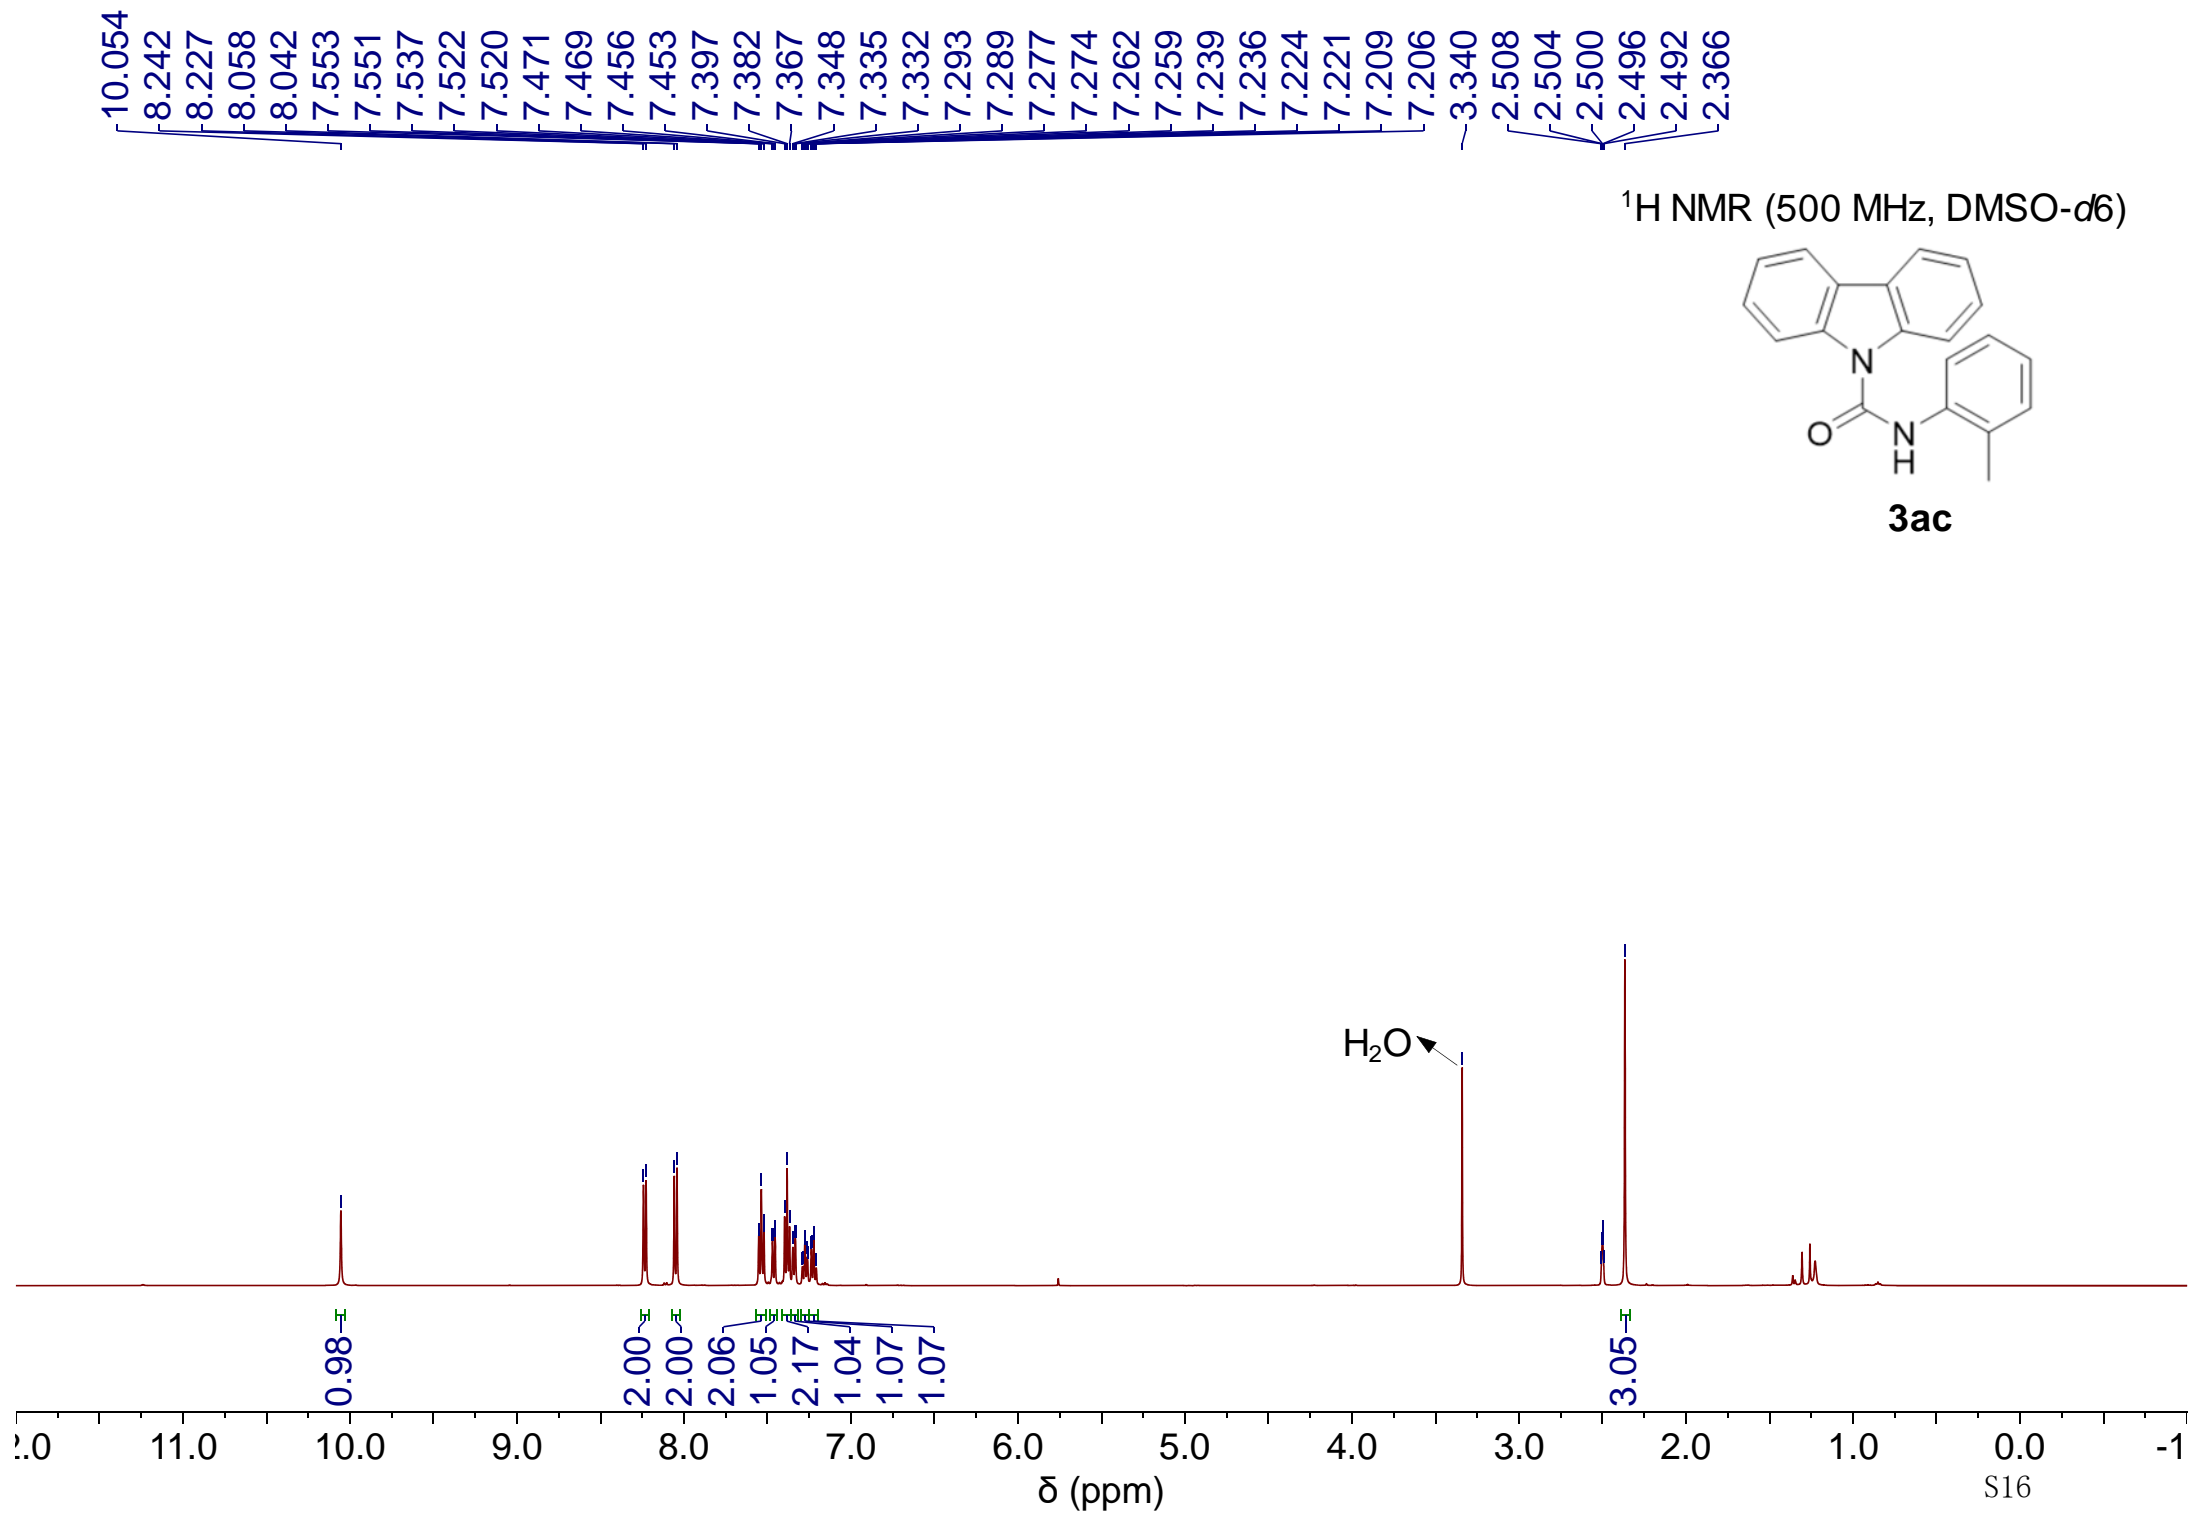

<sup>13</sup>C NMR (126 MHz, DMSO-*d*<sub>6</sub>)

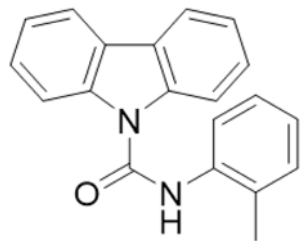

**3ac**

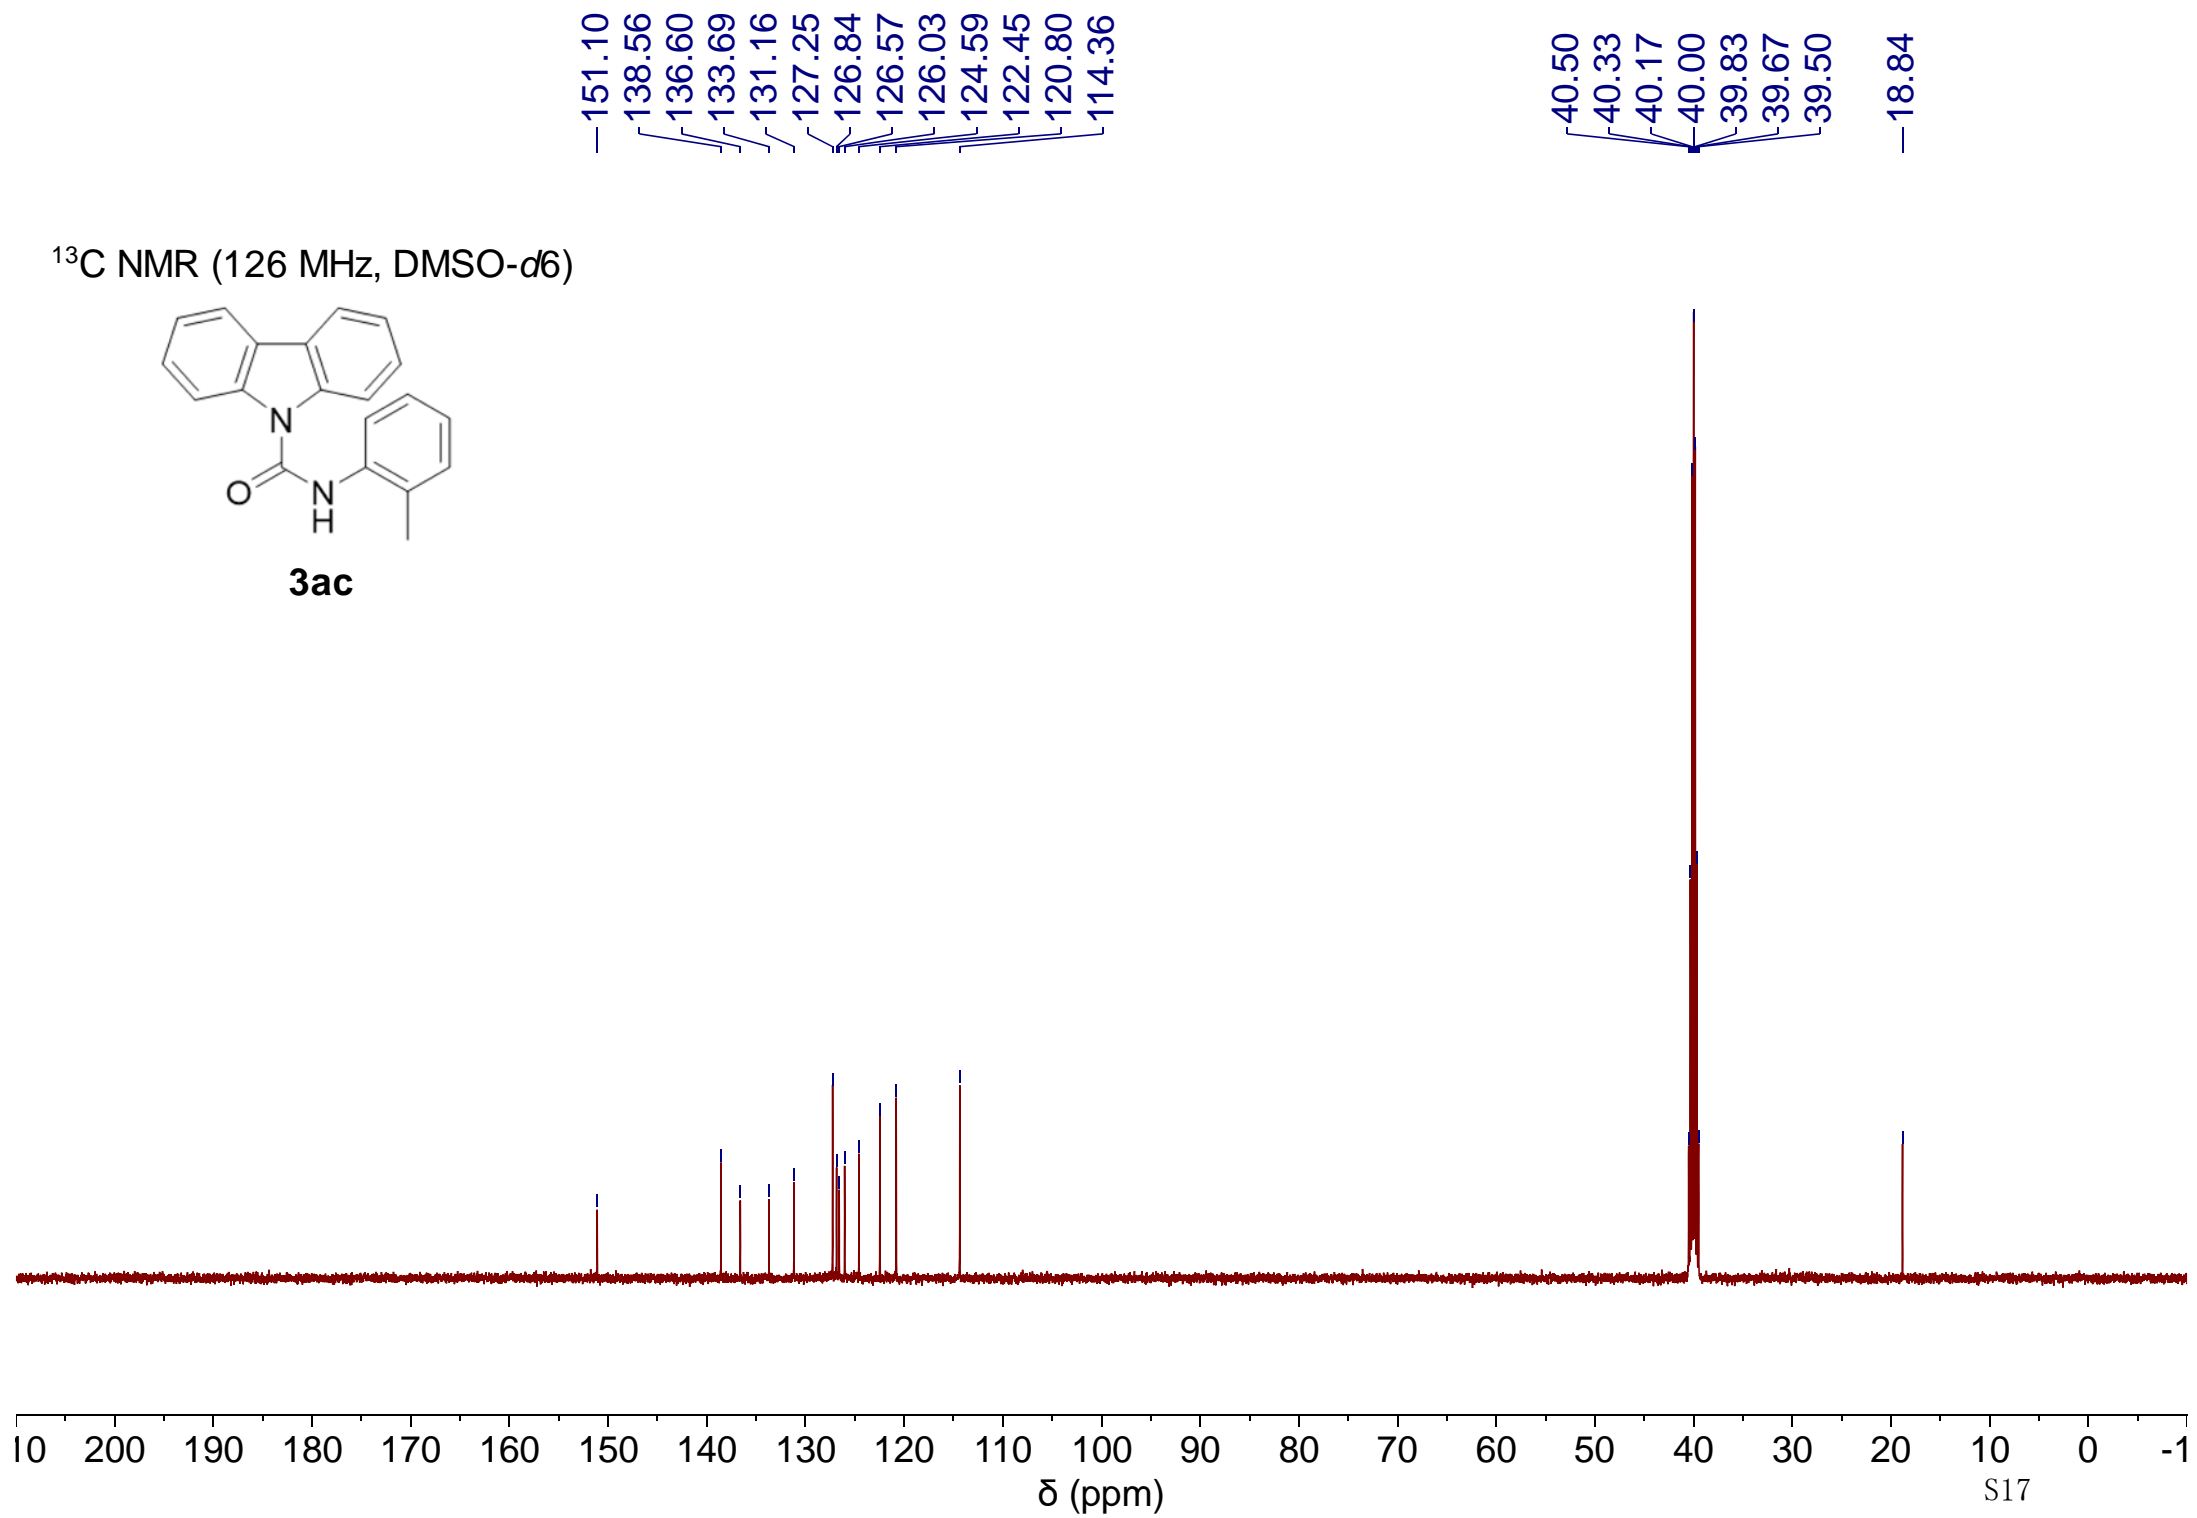

8.041  
8.023  
7.501  
7.496  
7.483  
7.479  
7.462  
7.369  
7.354  
7.339  
7.260  
6.959  
6.941

3.835

<sup>1</sup>H NMR (500 MHz, CDCl<sub>3</sub>)

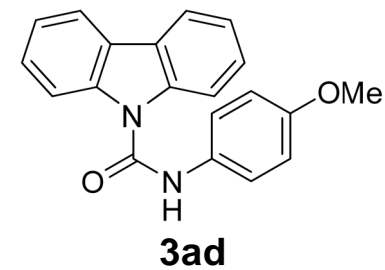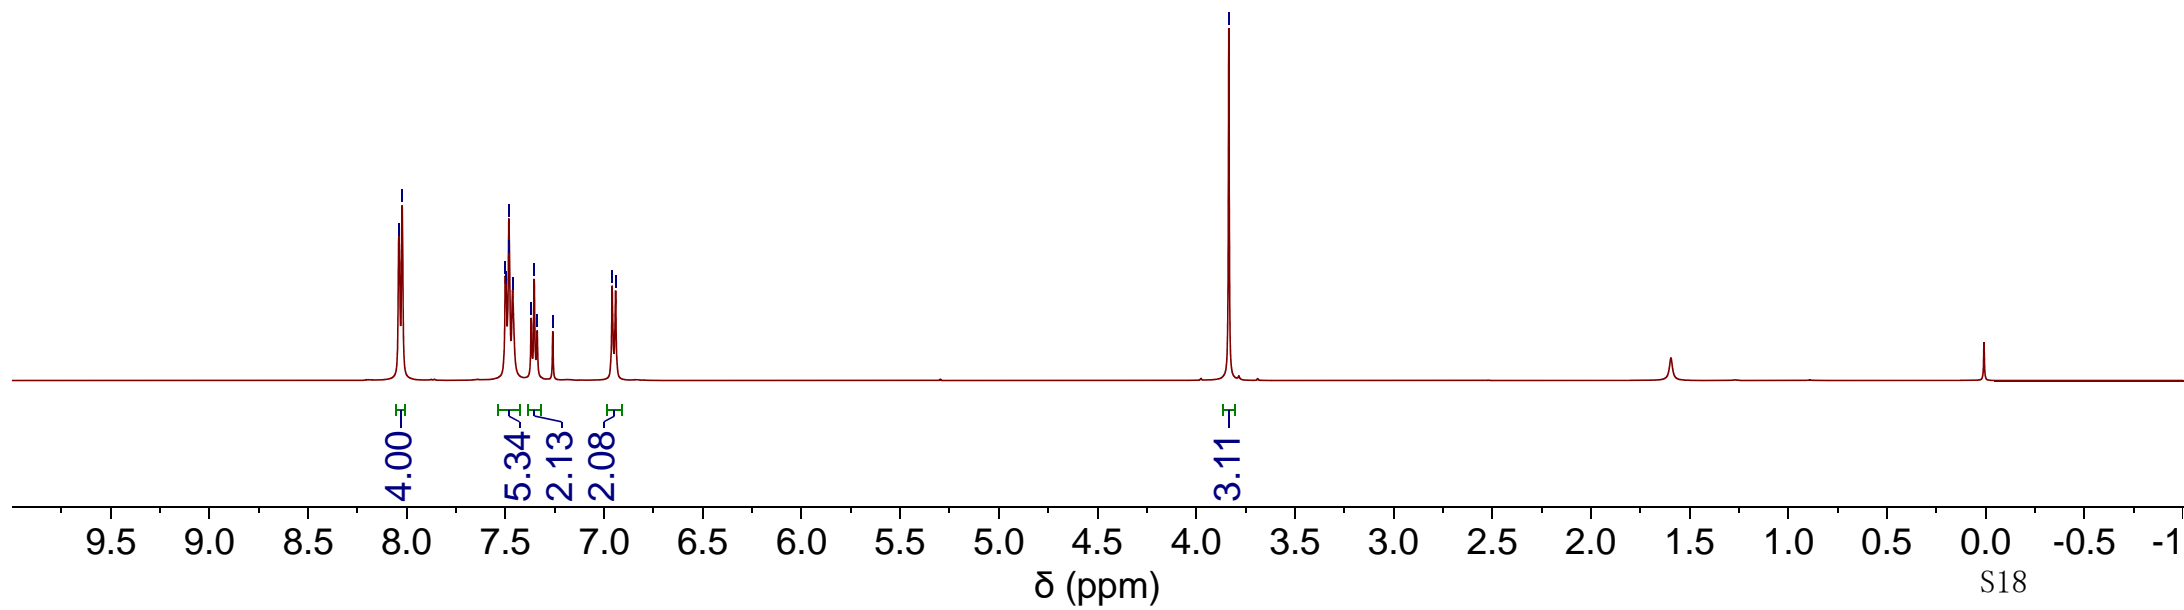

<sup>13</sup>C NMR (126 MHz, CDCl<sub>3</sub>)

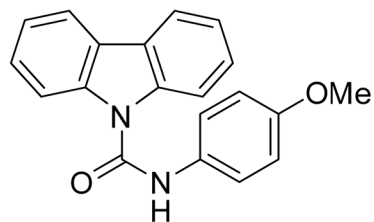

**3ad**

157.05  
150.56  
138.34  
130.13  
127.20  
125.35  
122.66  
122.22  
120.44  
114.65  
113.61  
77.41  
77.16  
76.91  
55.71

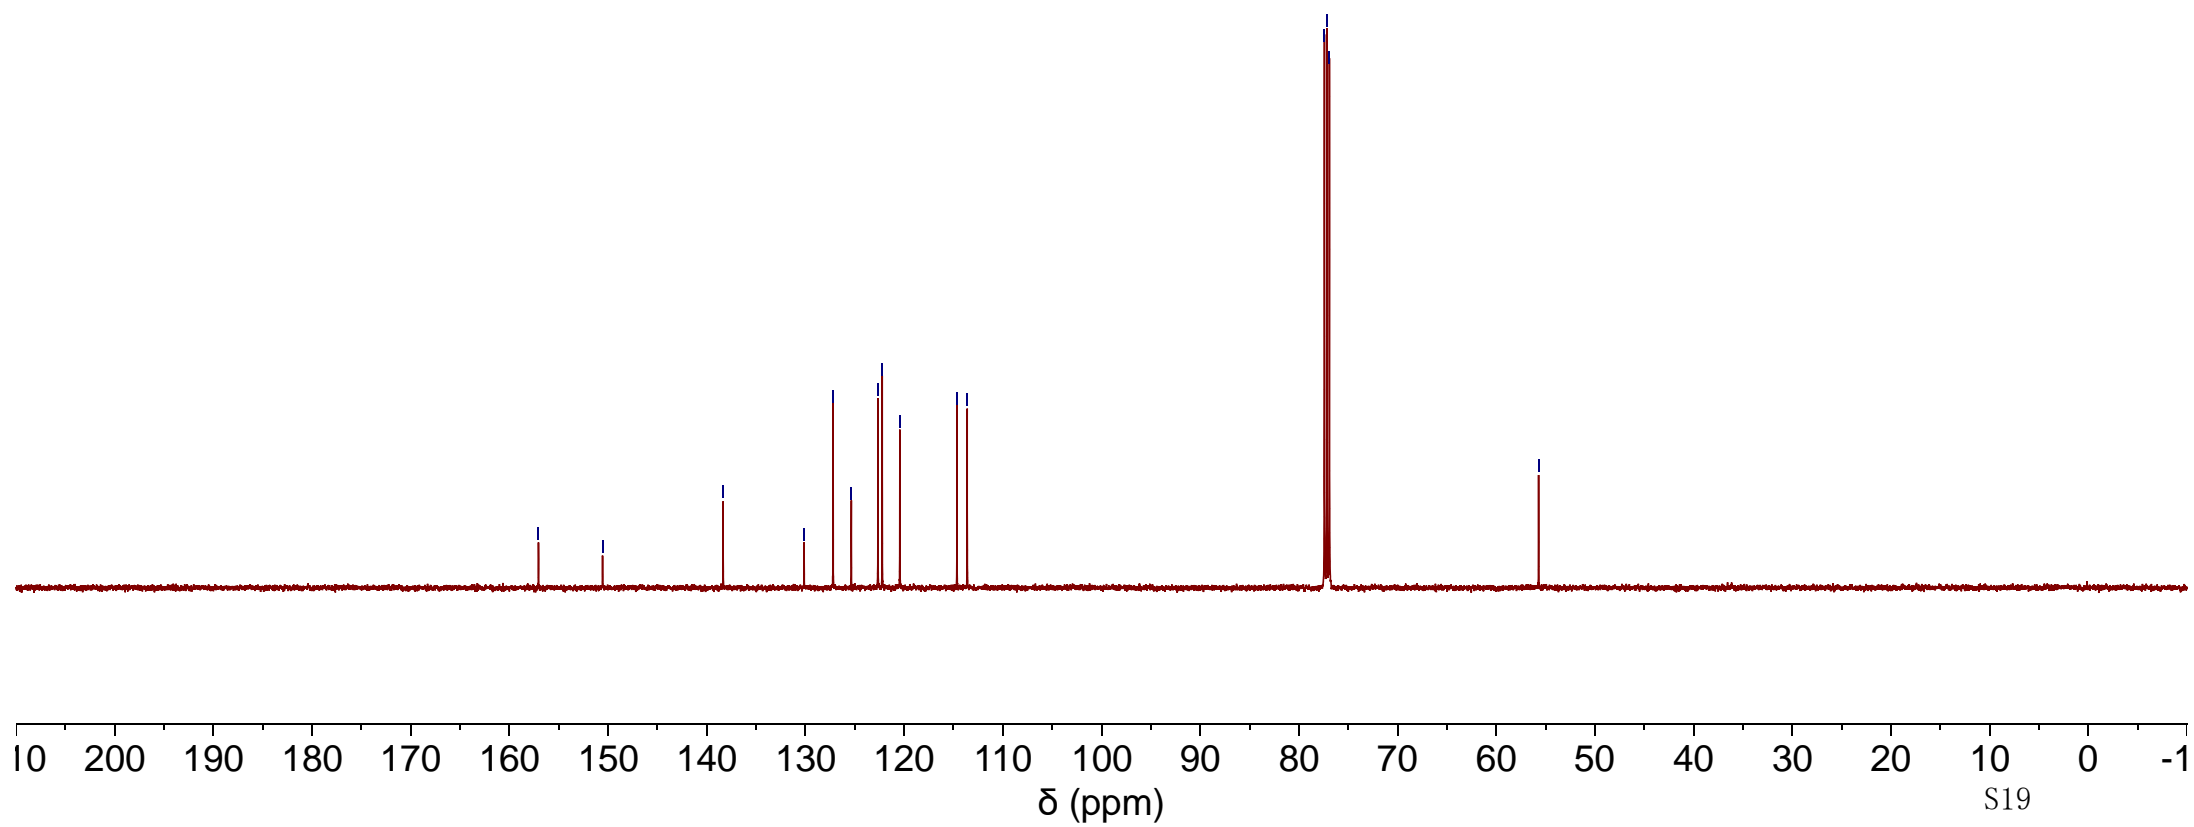

8.013  
7.999  
7.984  
7.562  
7.553  
7.544  
7.540  
7.535  
7.526  
7.485  
7.468  
7.453  
7.365  
7.350  
7.335  
7.260  
7.121  
7.104  
7.086

<sup>1</sup>H NMR (500 MHz, CDCl<sub>3</sub>)

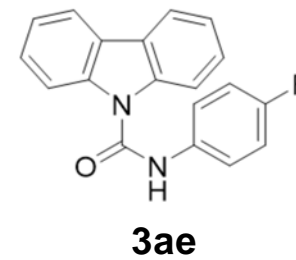

-1.579

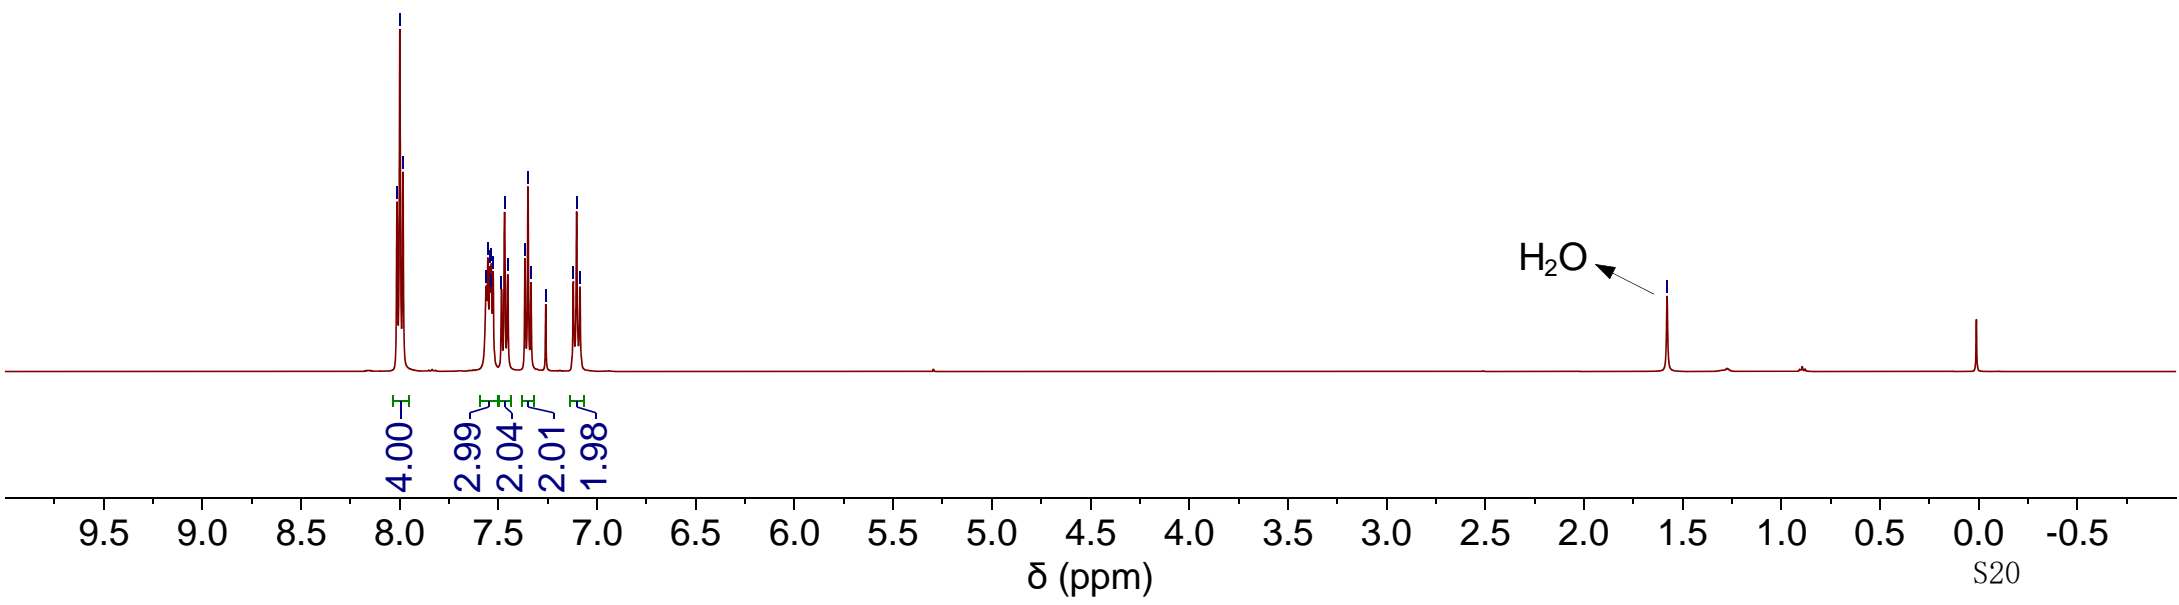

<sup>13</sup>C NMR (126 MHz, CDCl<sub>3</sub>)

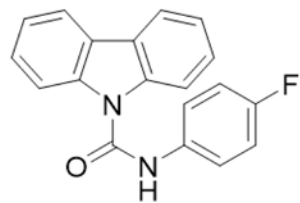

**3ae**

160.86  
158.91  
150.43  
138.21  
133.20  
133.18  
127.25  
125.42  
122.84  
122.09  
122.03  
120.47  
116.27  
116.09  
113.58  
77.41  
77.16  
76.91

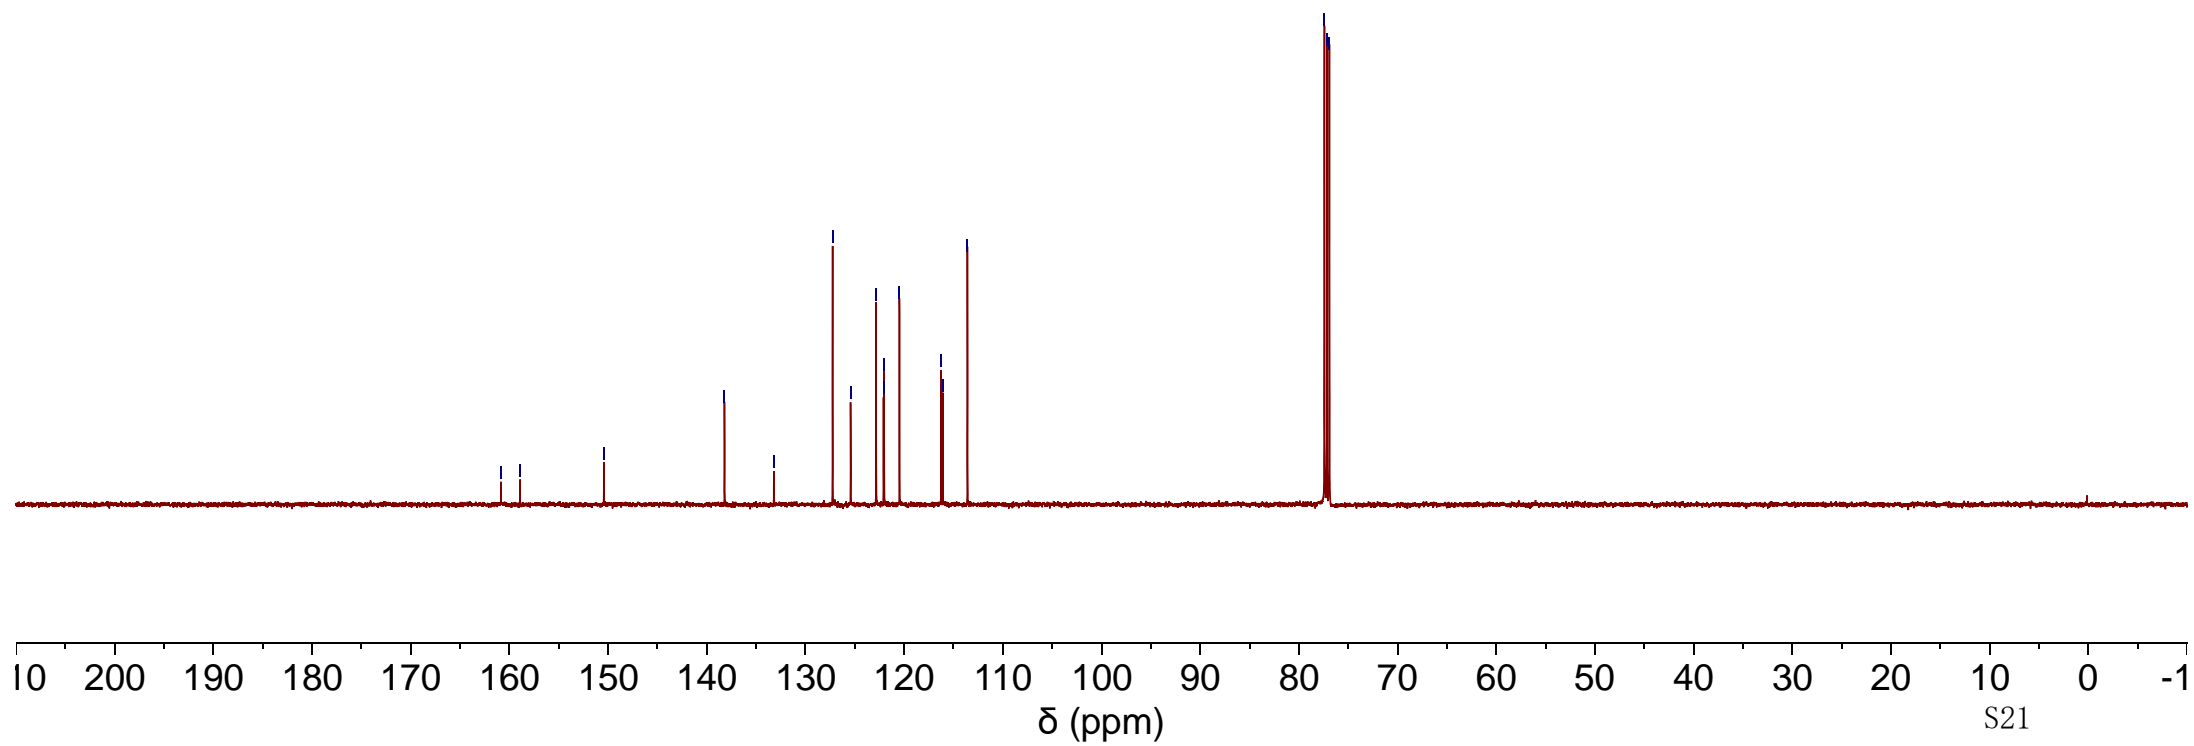

10.697

8.240  
8.225  
7.943  
7.926  
7.746  
7.728  
7.547  
7.531  
7.516  
7.492  
7.475  
7.401  
7.386  
7.371

3.358  
2.508  
2.504  
2.500  
2.496  
2.493

<sup>1</sup>H NMR (500 MHz, DMSO-d<sub>6</sub>)

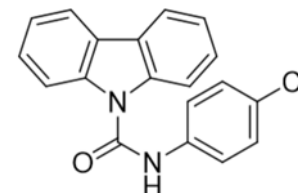

**3af**

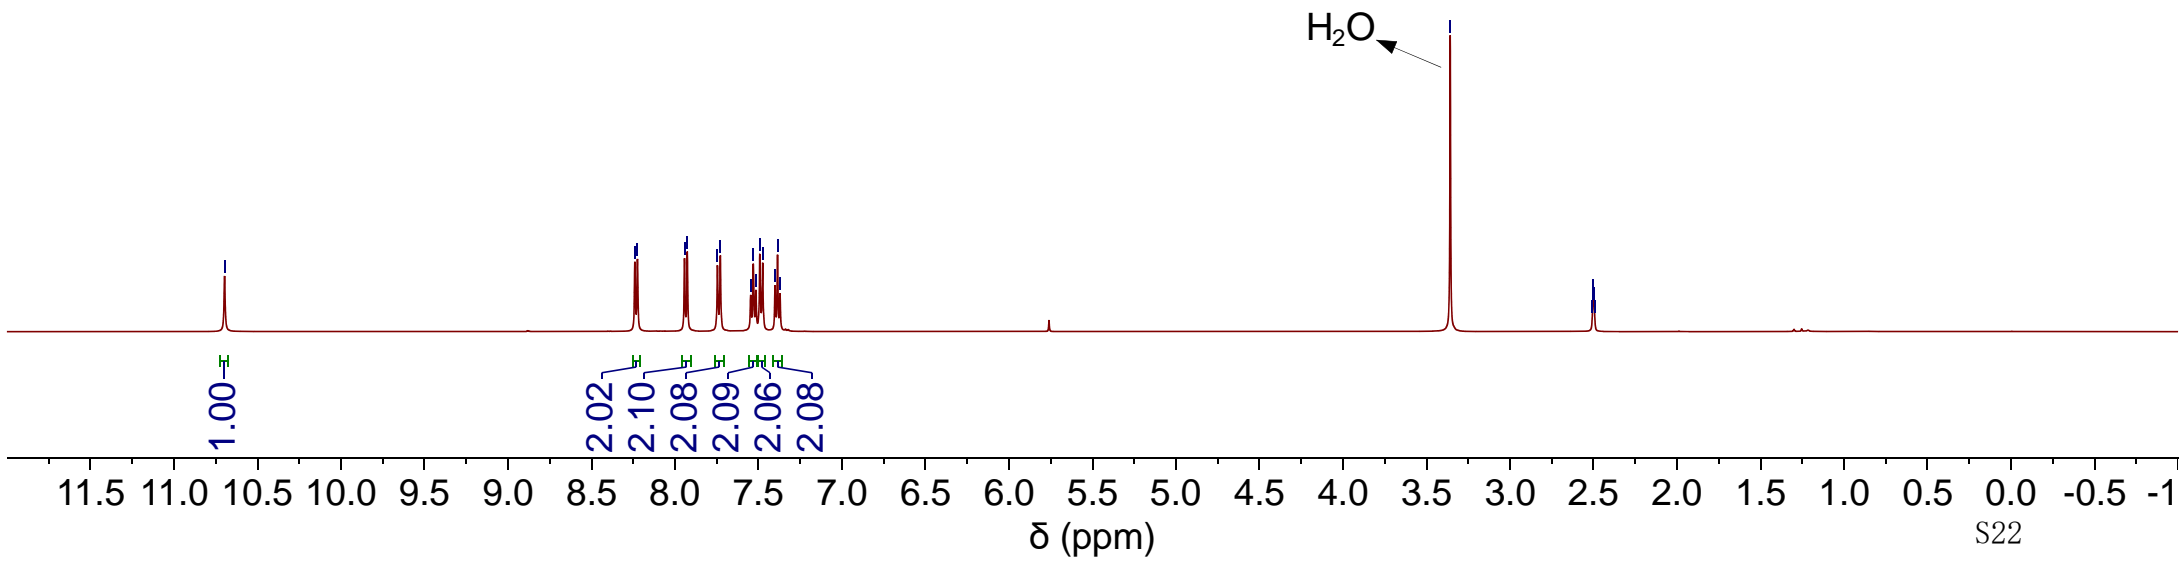

<sup>13</sup>C NMR (126 MHz, DMSO-*d*<sub>6</sub>)

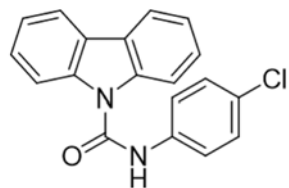

**3af**

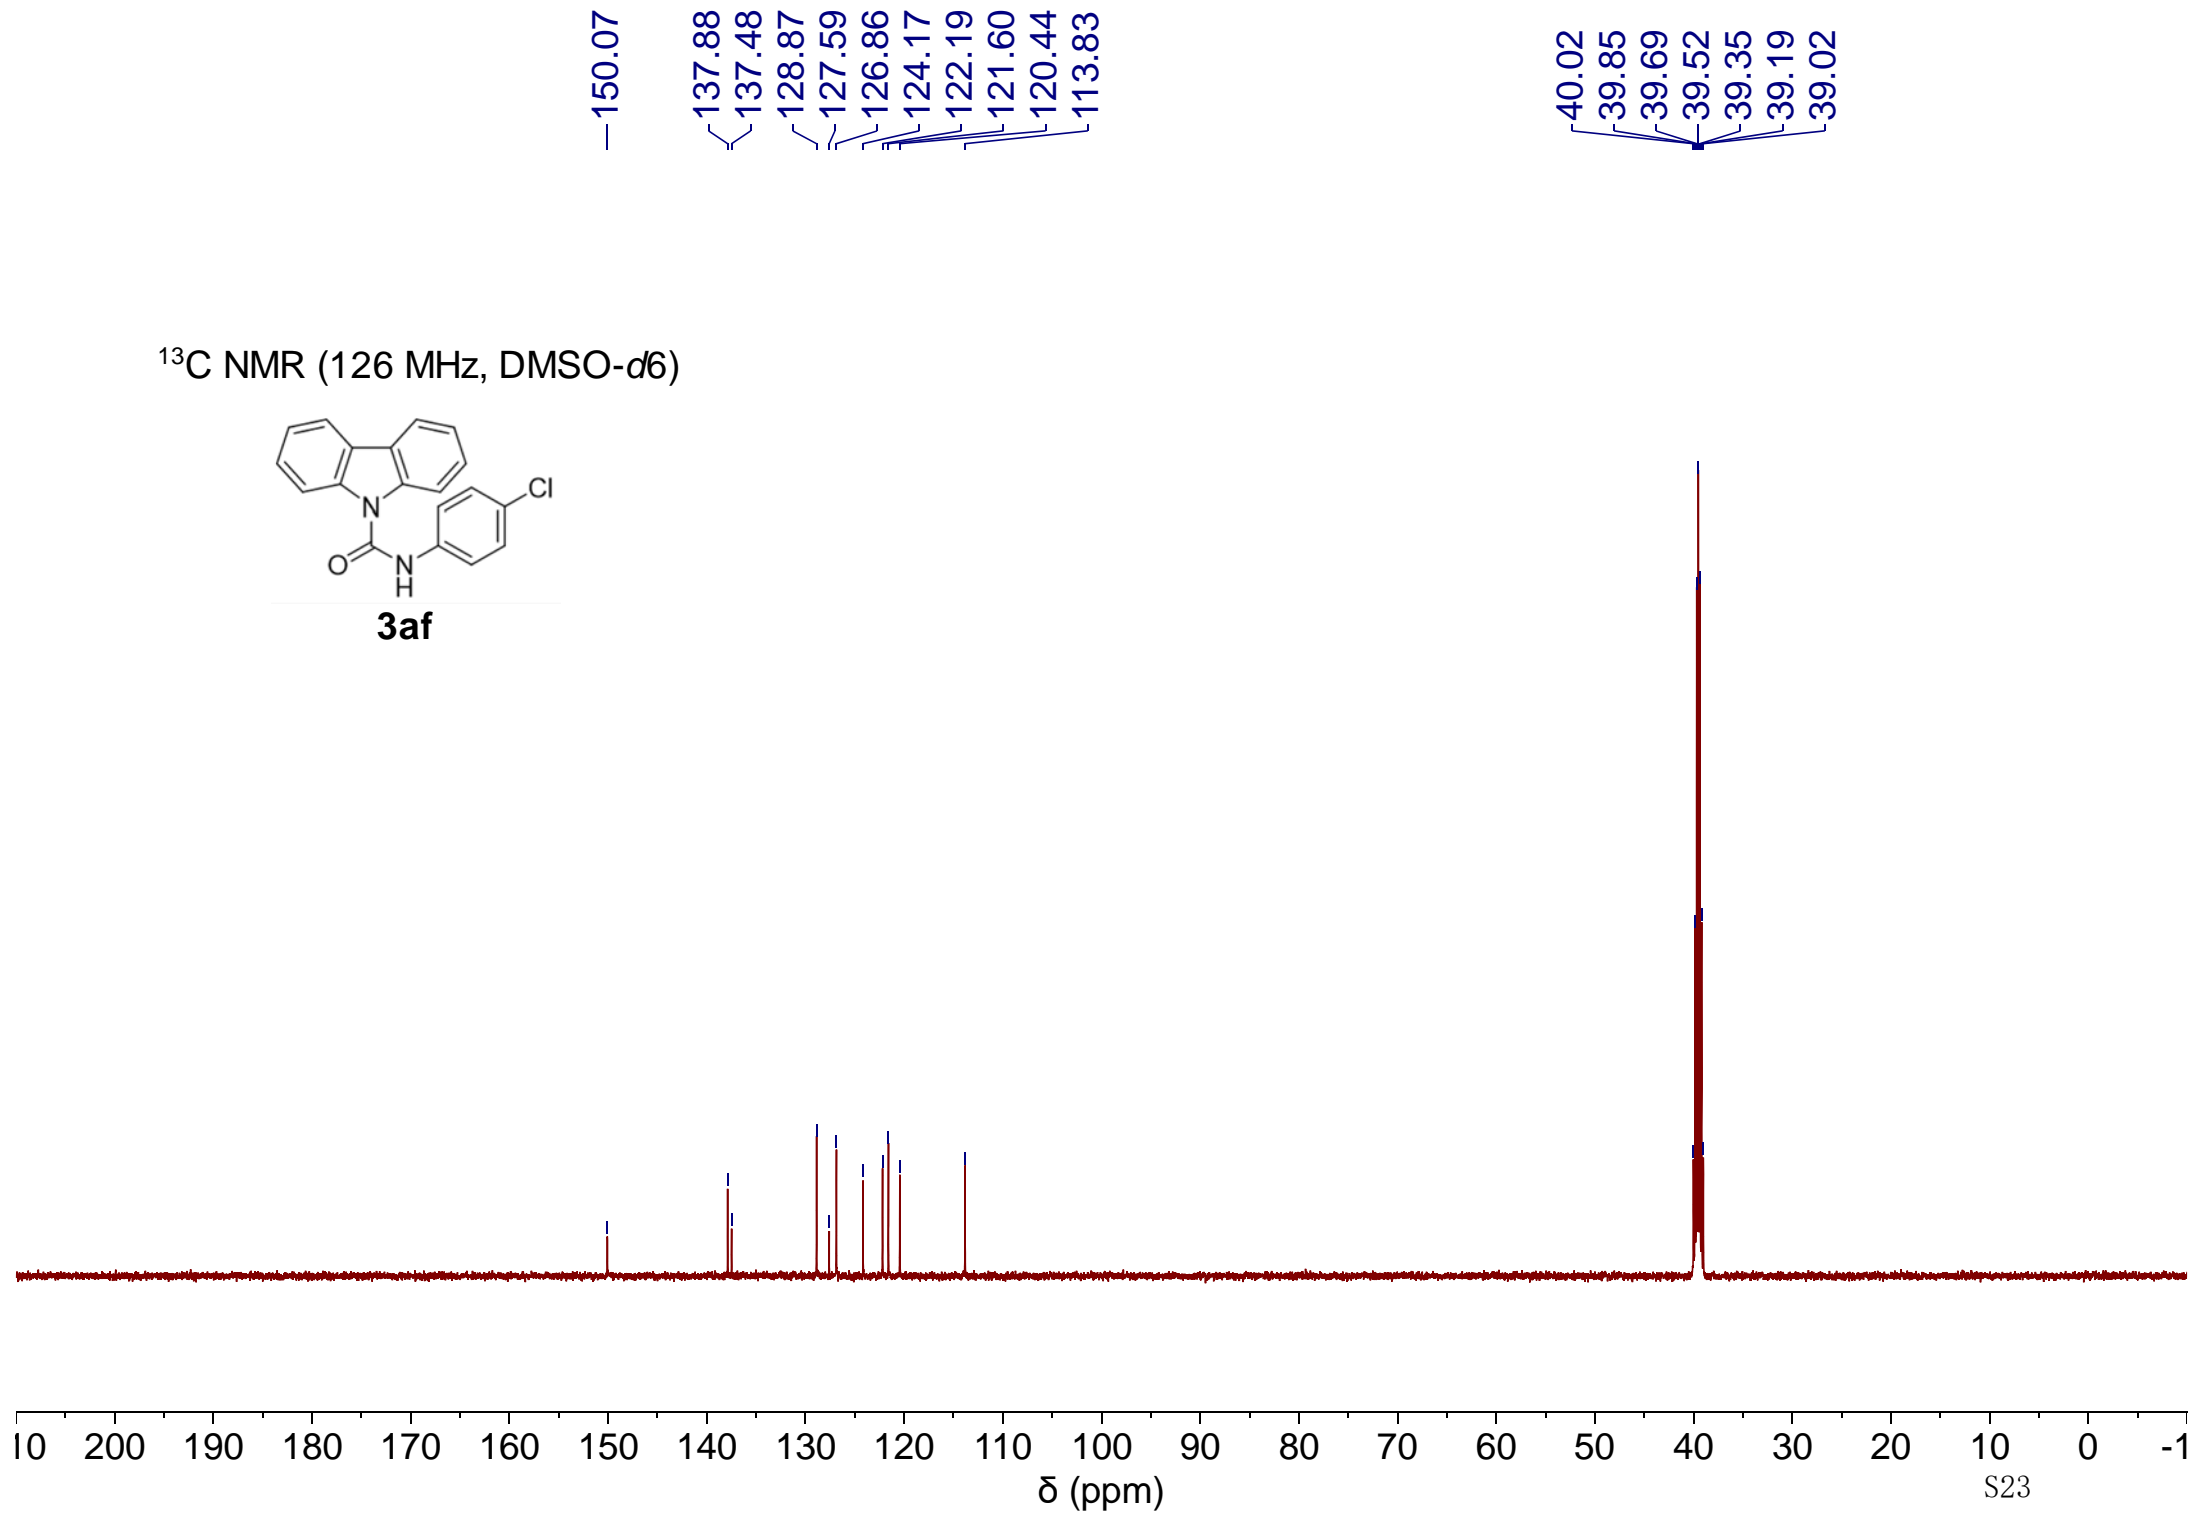



10.743  
8.242  
8.226  
7.964  
7.947  
7.862  
7.858  
7.854  
7.665  
7.661  
7.649  
7.645  
7.554  
7.537  
7.522  
7.466  
7.450  
7.434  
7.407  
7.392  
7.377  
7.238  
7.234  
7.222  
7.218

3.356  
2.507  
2.504  
2.500  
2.496

<sup>1</sup>H NMR (500 MHz, DMSO-*d*<sub>6</sub>)

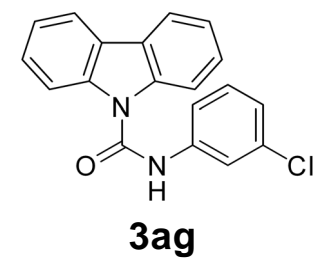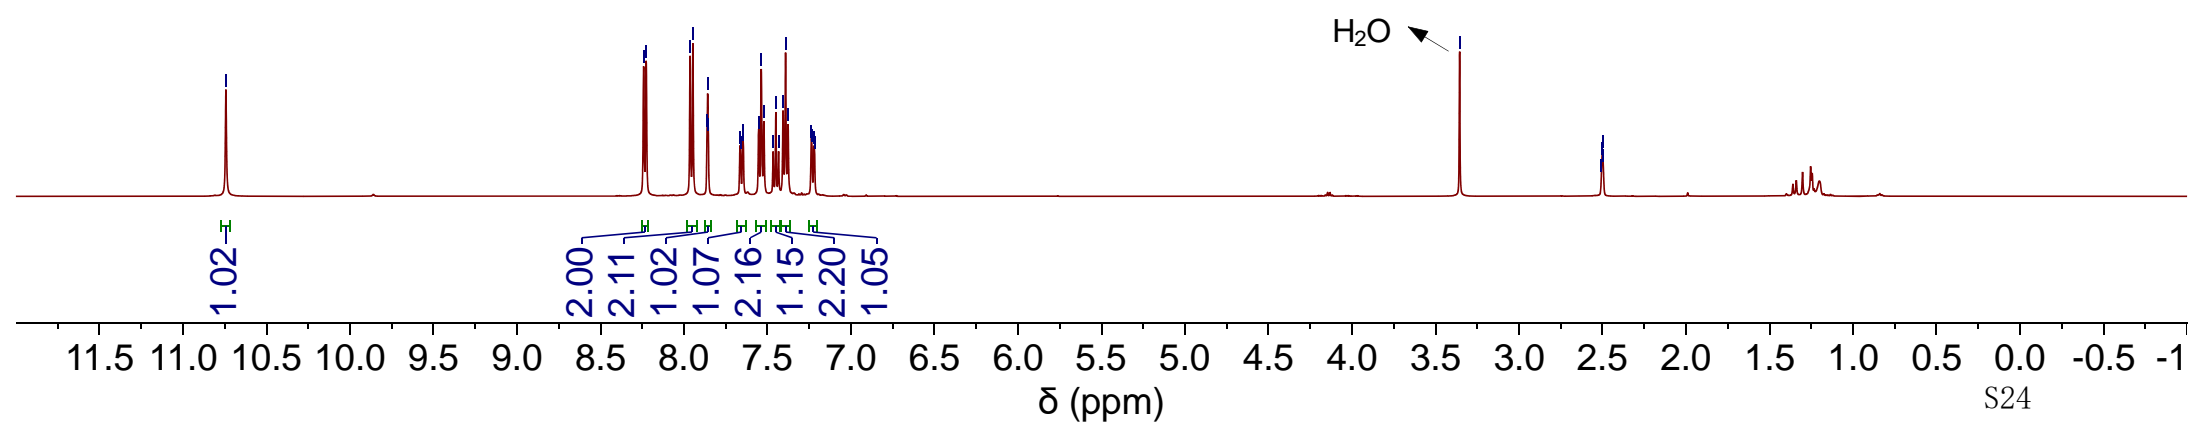

<sup>1</sup>H NMR (500 MHz, DMSO-*d*<sub>6</sub>)

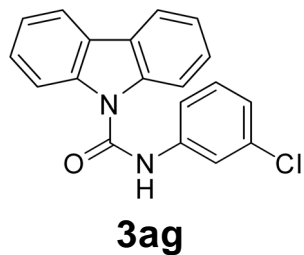

150.06  
140.04  
137.85  
133.26  
130.63  
126.87  
124.21  
123.56  
122.25  
120.41  
119.49  
118.42  
113.89

40.02  
39.85  
39.69  
39.52  
39.35  
39.19  
39.02

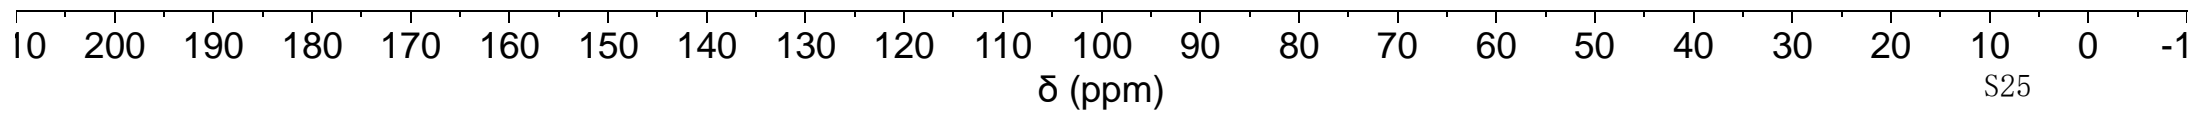

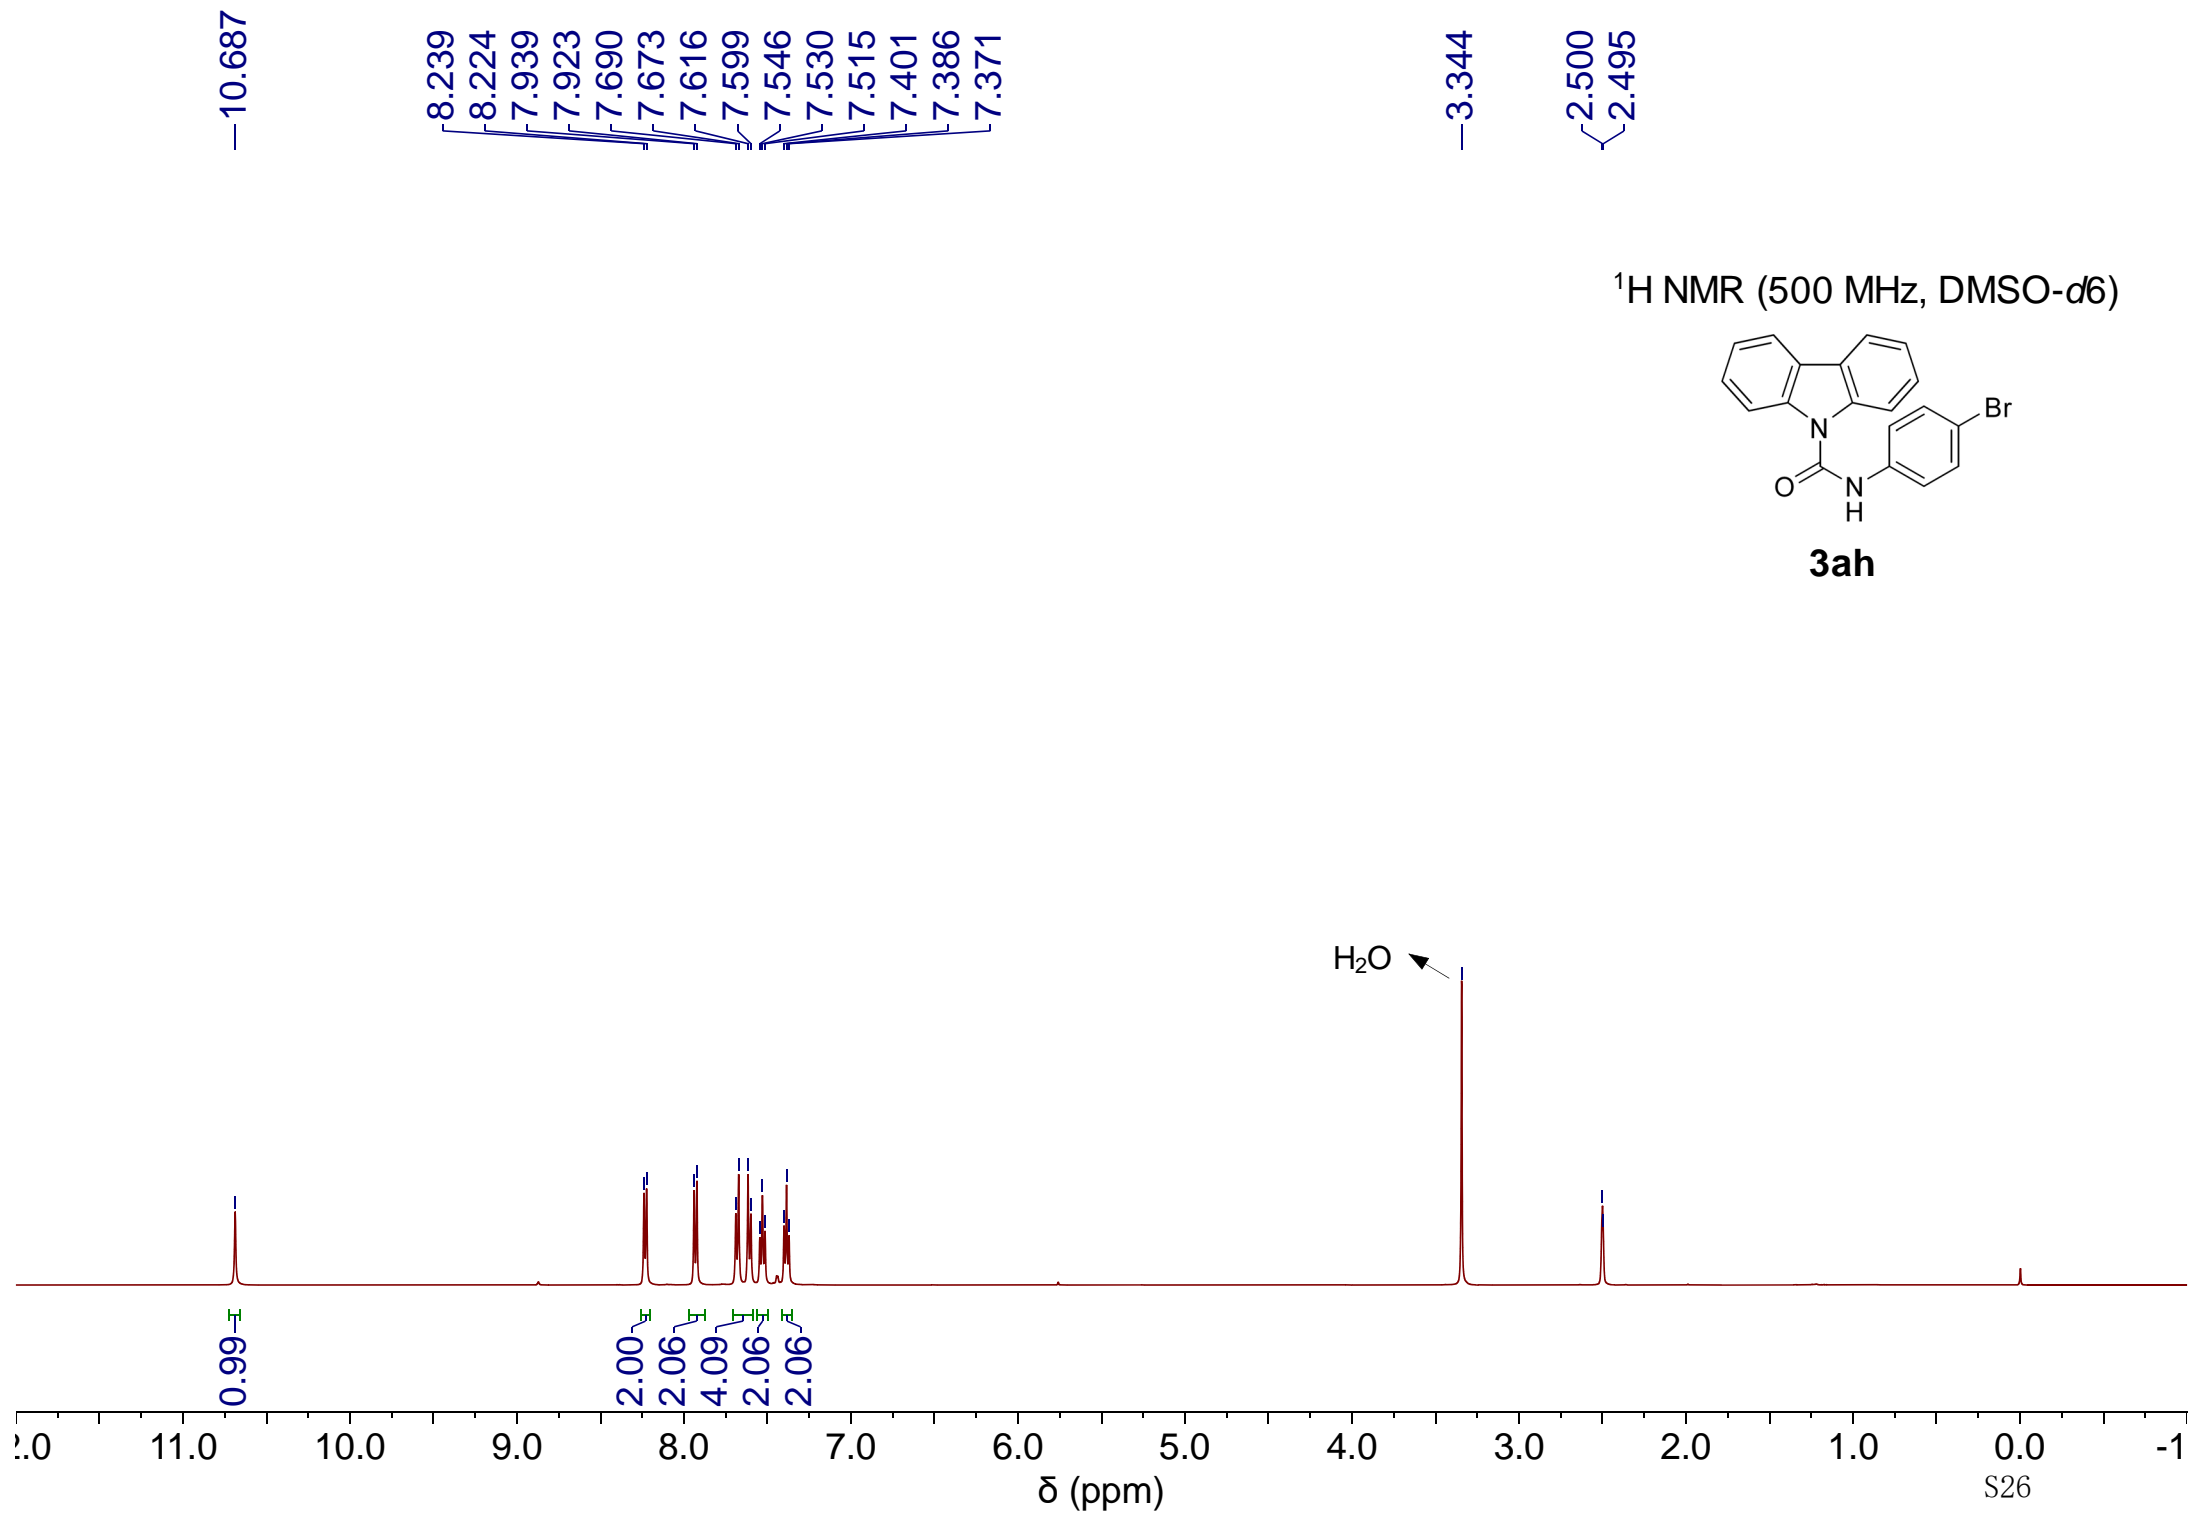

<sup>13</sup>C NMR (126 MHz, DMSO-*d*<sub>6</sub>)

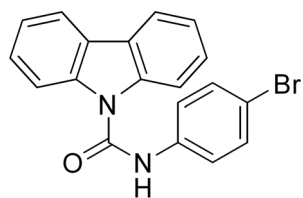

**3ah**

150.03  
137.90  
137.87  
131.76  
126.85  
124.16  
122.18  
121.95  
120.42  
115.62  
113.81

40.02  
39.86  
39.69  
39.52  
39.35  
39.19  
39.02

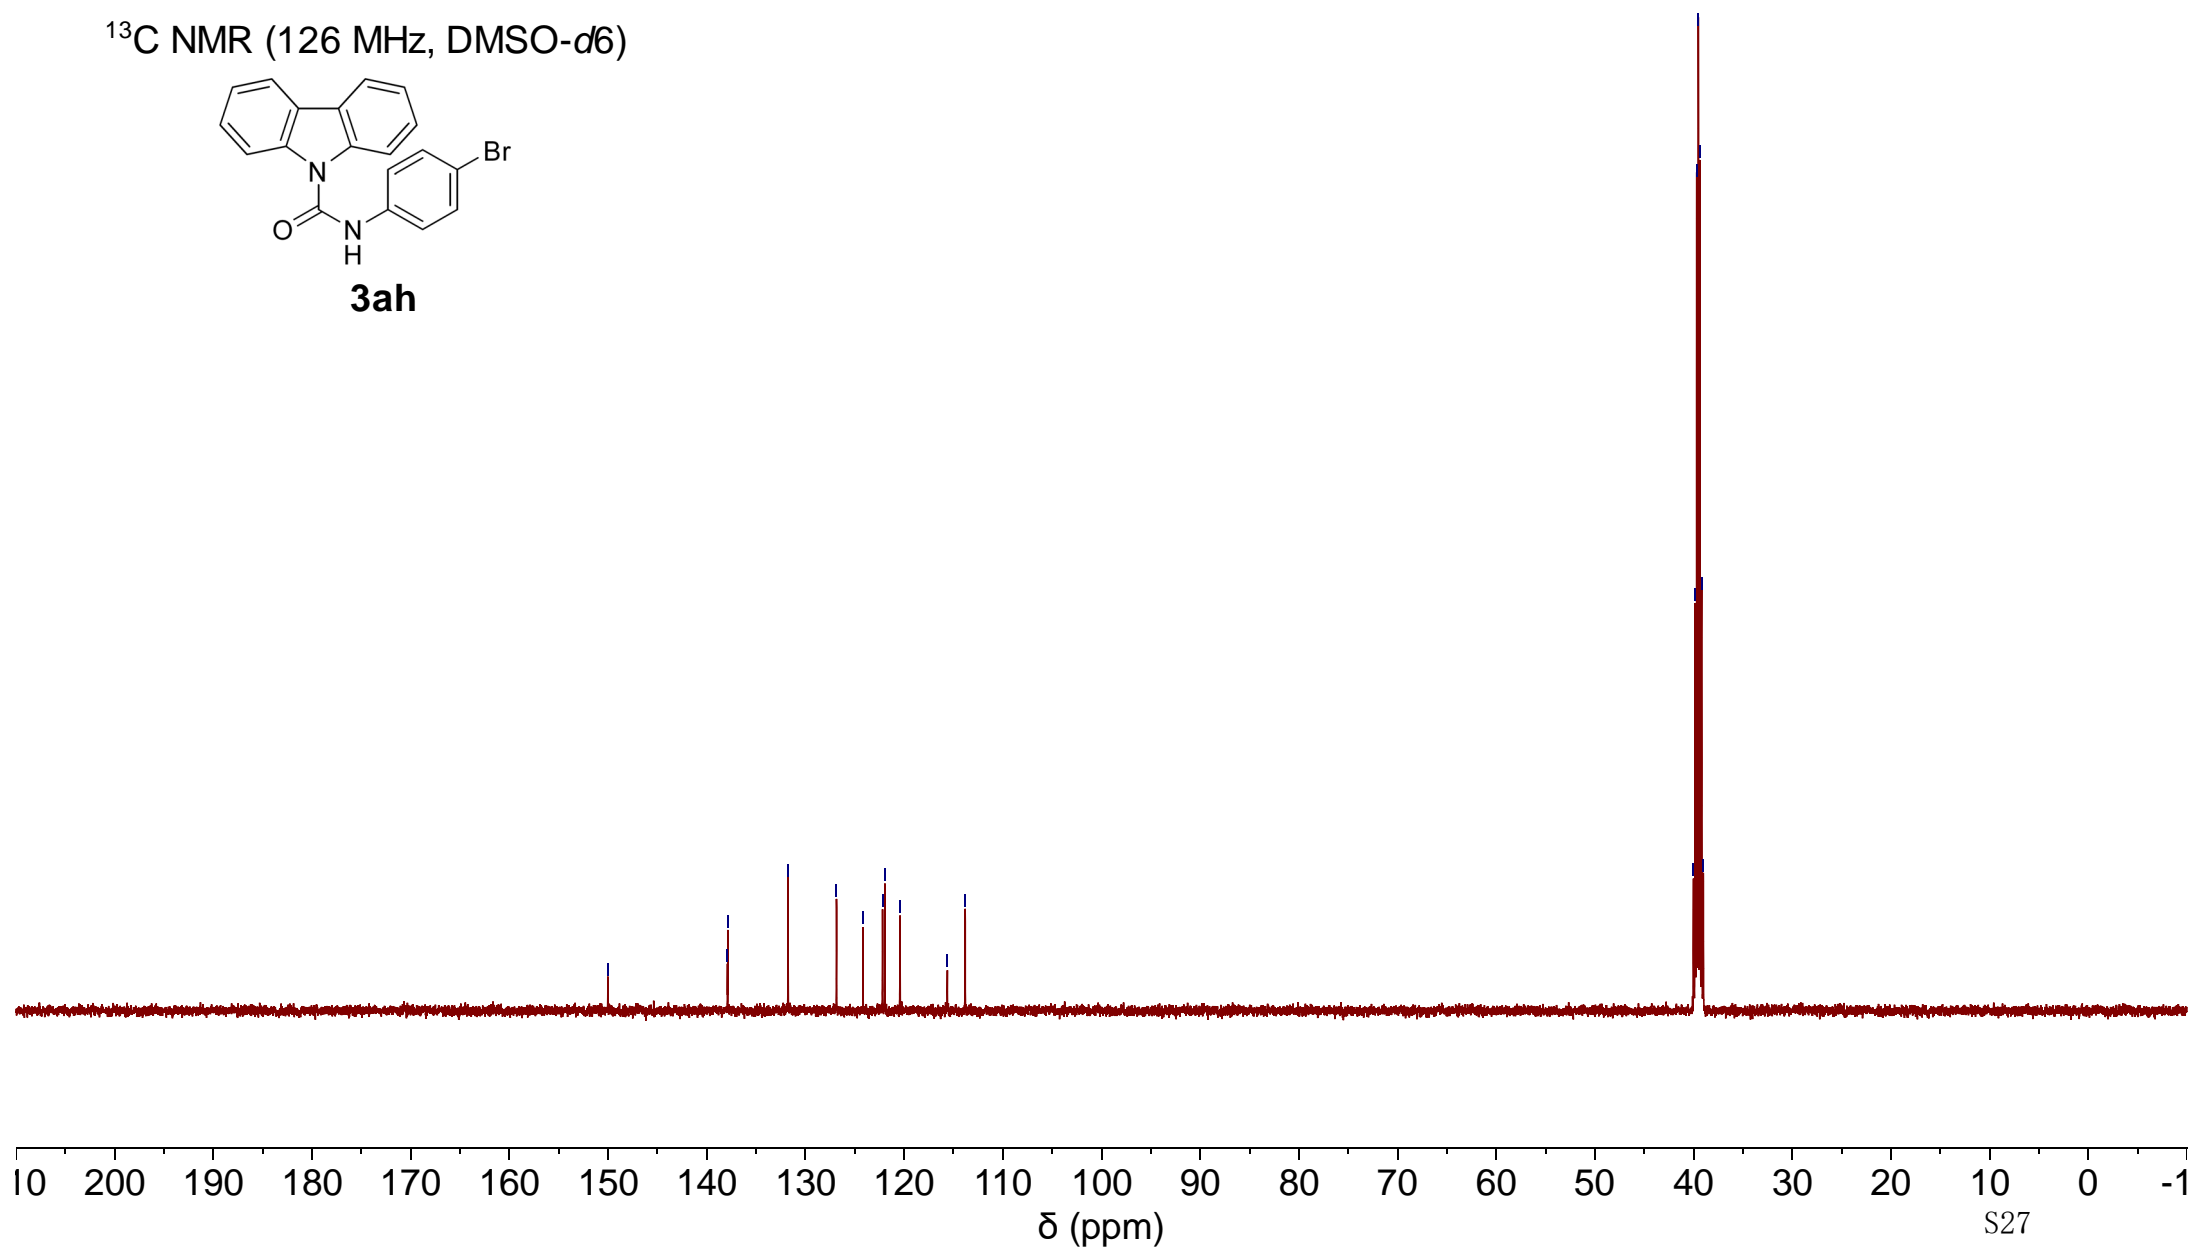

10.925

8.249  
8.234  
7.963  
7.946  
7.922  
7.905  
7.802  
7.785  
7.555  
7.553  
7.541  
7.538  
7.536  
7.524  
7.522  
7.414  
7.399  
7.384

3.352  
2.507  
2.504  
2.500  
2.496  
2.492

<sup>1</sup>H NMR (500 MHz, DMSO-*d*<sub>6</sub>)

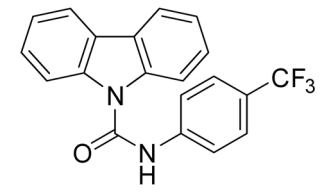

**3ai**

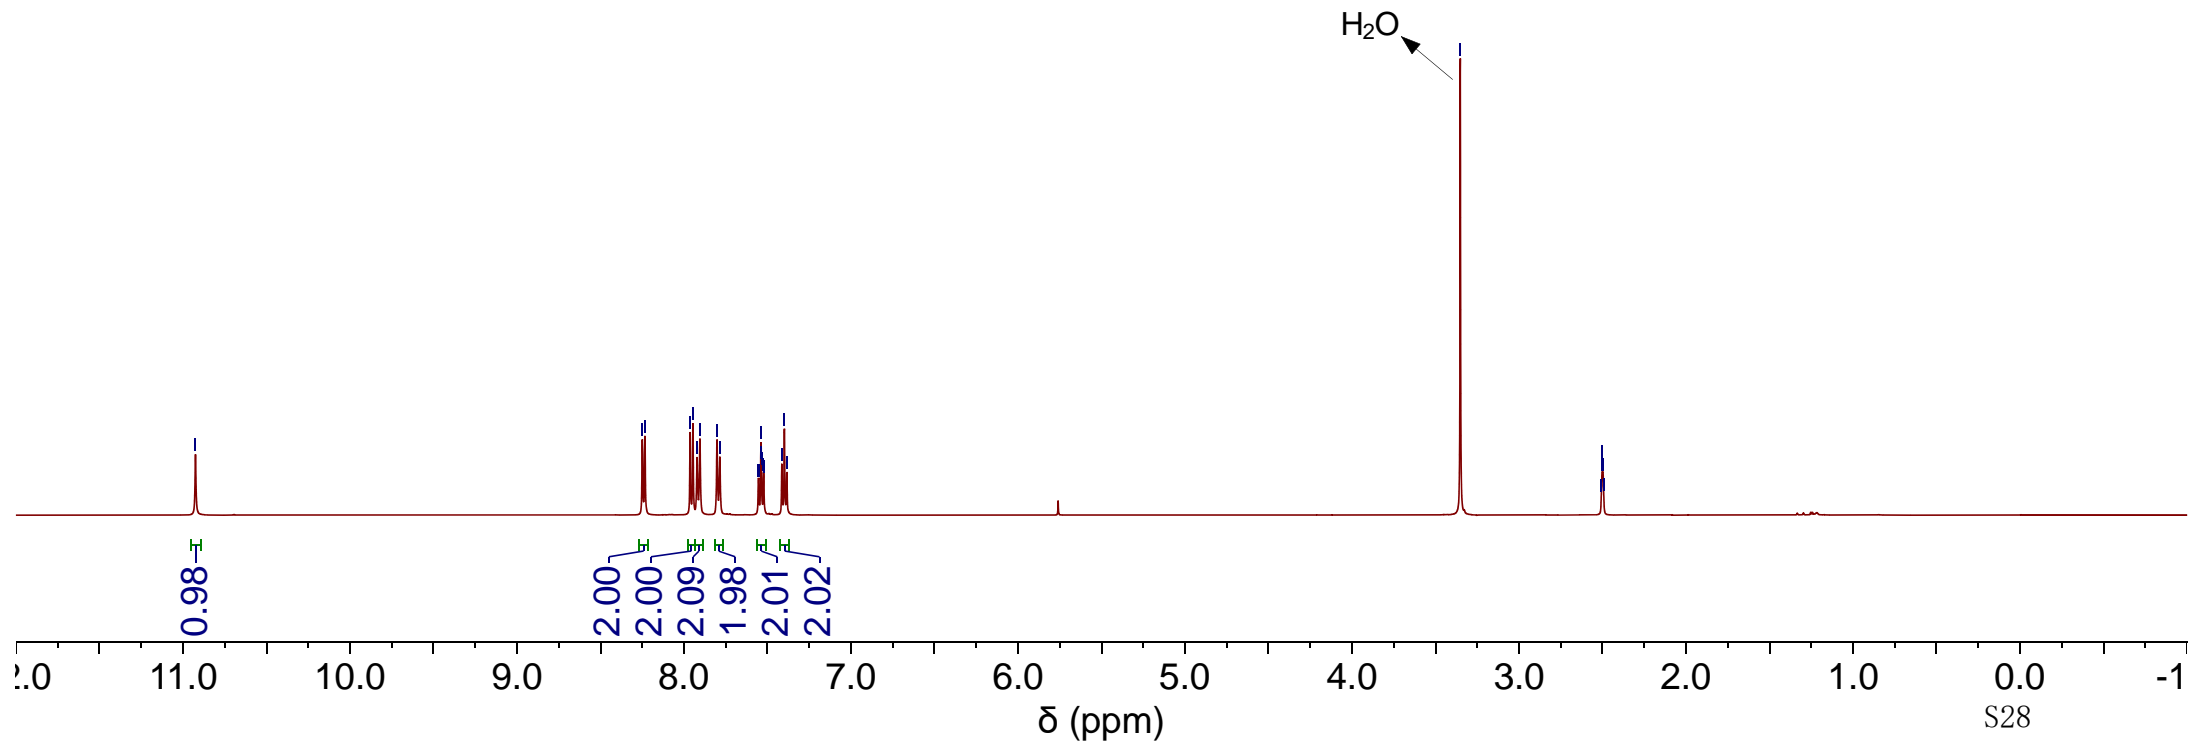

150.14  
142.28  
137.84  
126.93  
126.27  
126.24  
125.52  
124.28  
123.97  
123.72  
123.36  
122.37  
120.46  
119.87  
113.95

40.02  
39.85  
39.68  
39.52  
39.35  
39.18  
39.02

<sup>13</sup>C NMR (126 MHz, DMSO-*d*<sub>6</sub>)

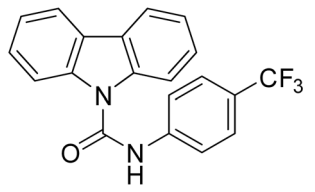

**3ai**

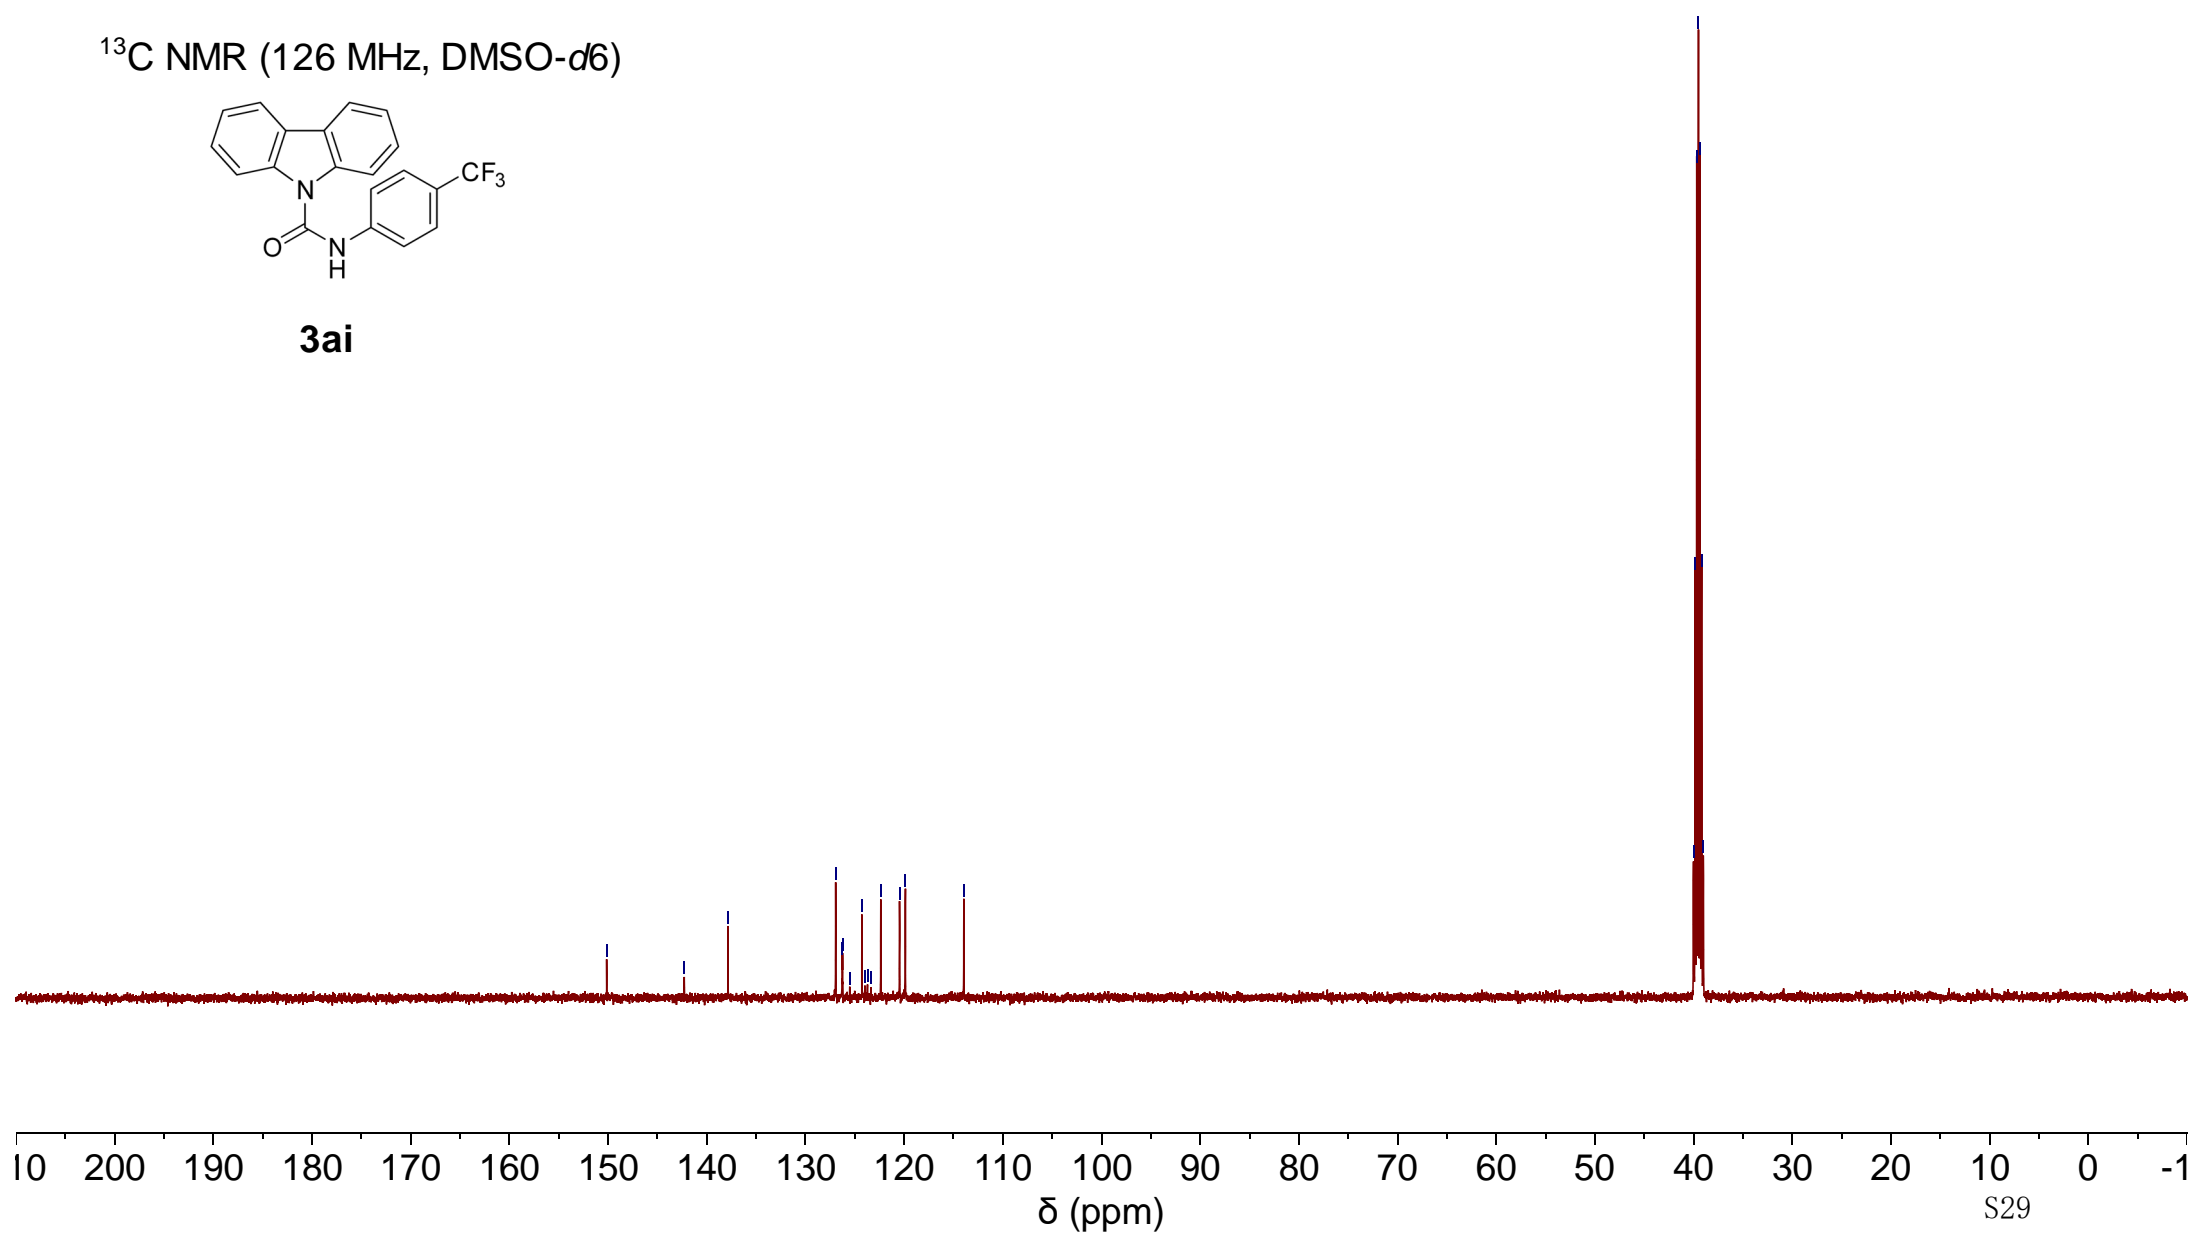

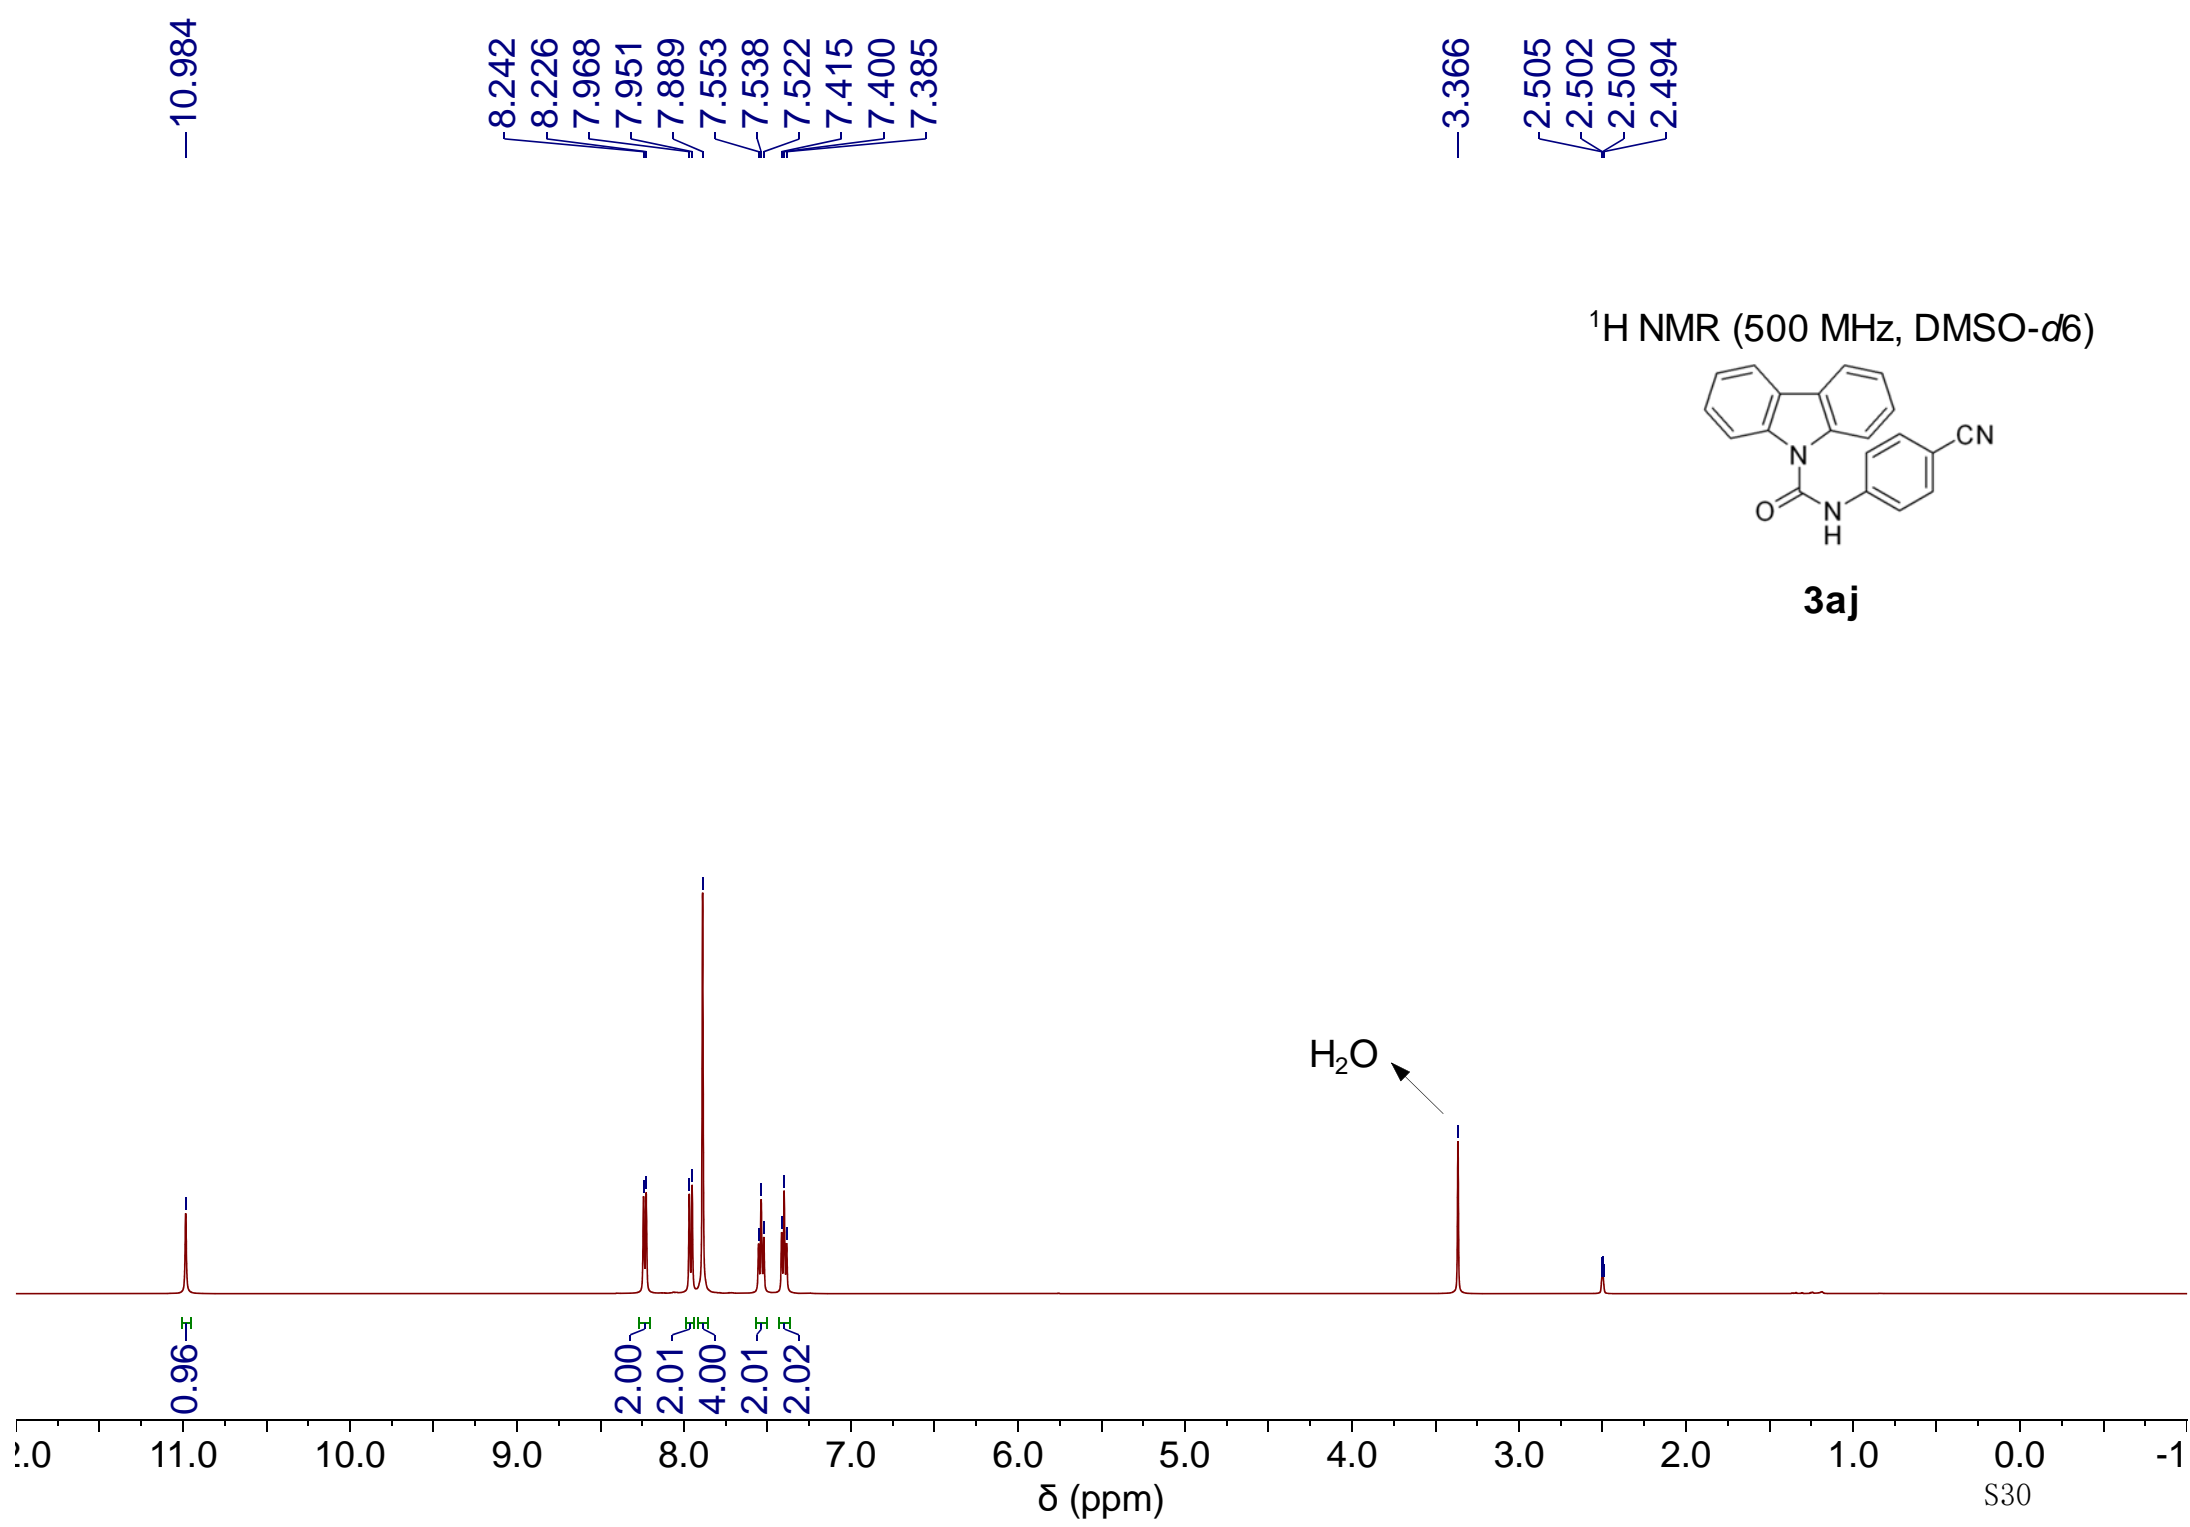

150.03  
142.99  
137.79  
133.37  
126.94  
124.34  
122.45  
120.44  
119.99  
119.09  
114.03  
105.54

40.02  
39.85  
39.69  
39.52  
39.35  
39.19  
39.02

<sup>13</sup>C NMR (126 MHz, DMSO-*d*<sub>6</sub>)

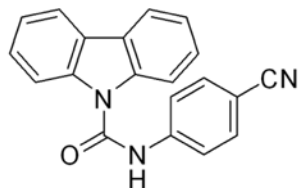

**3aj**

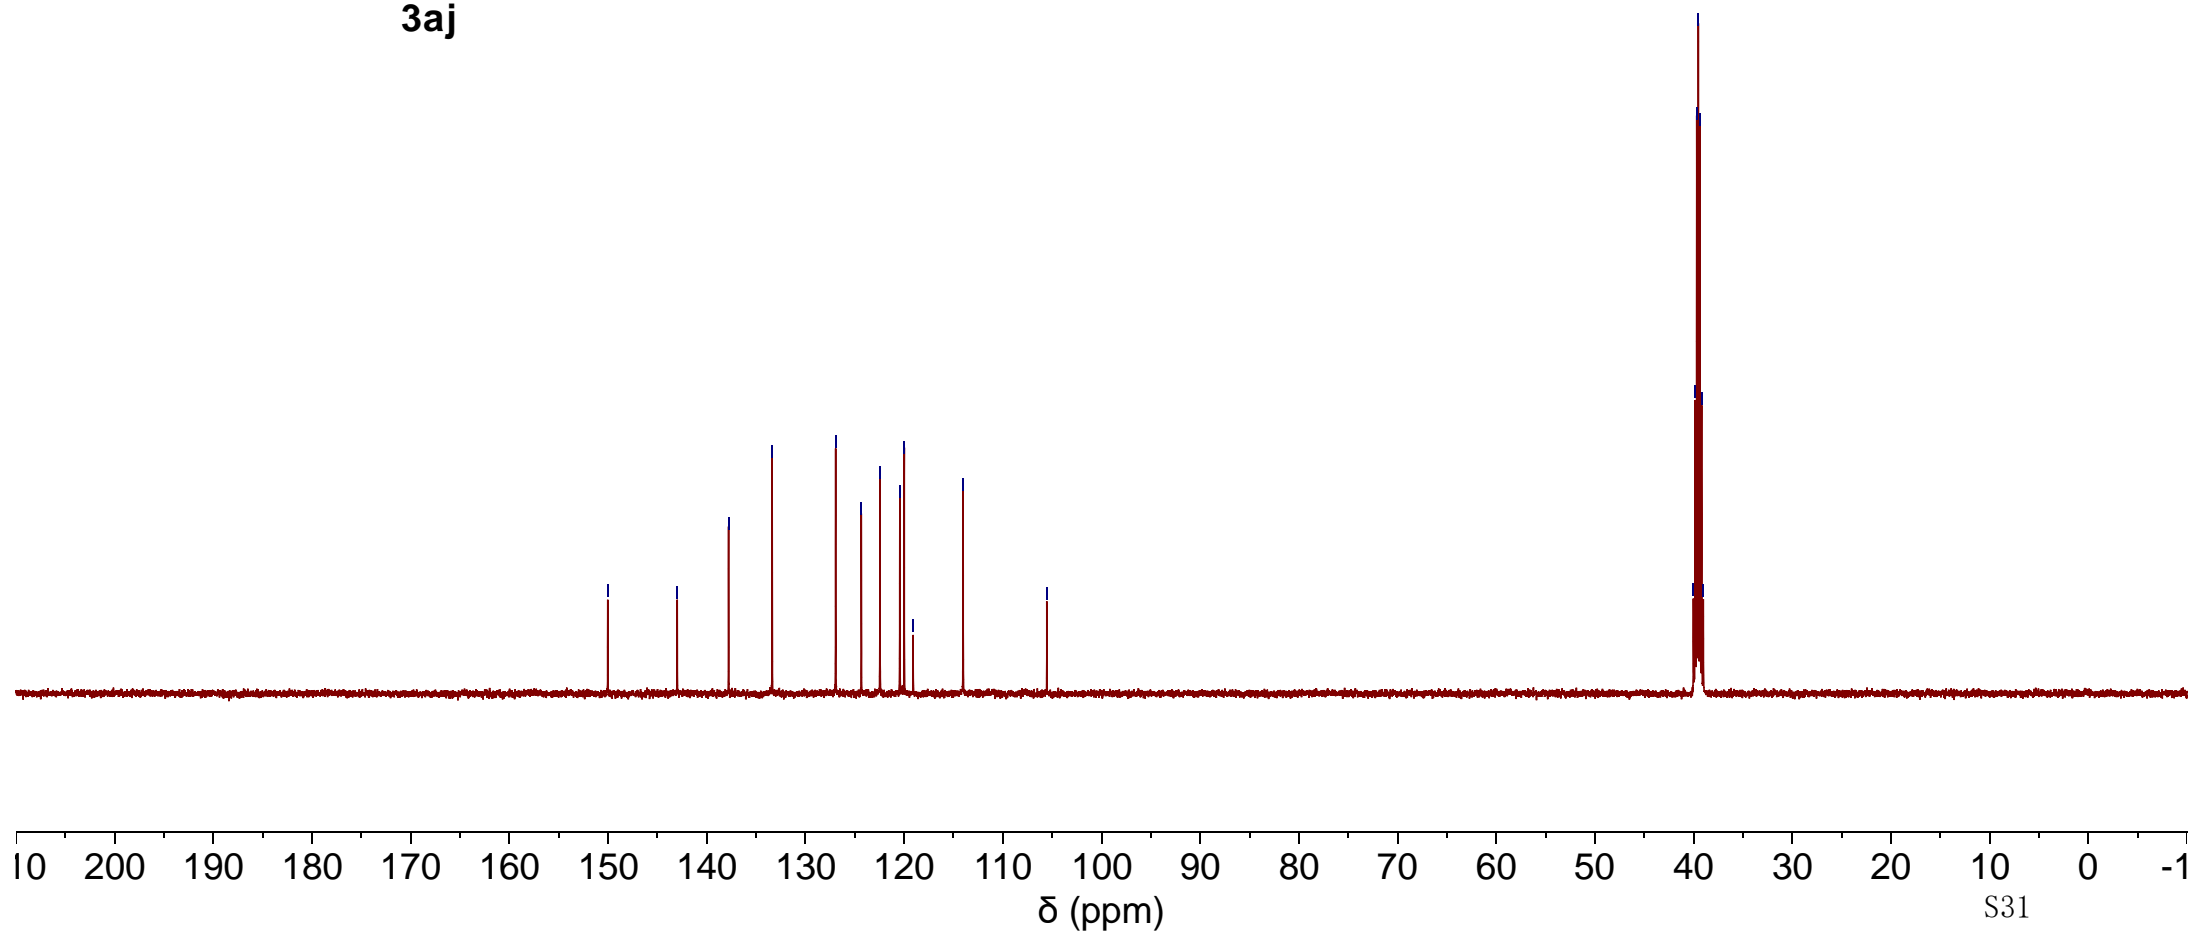



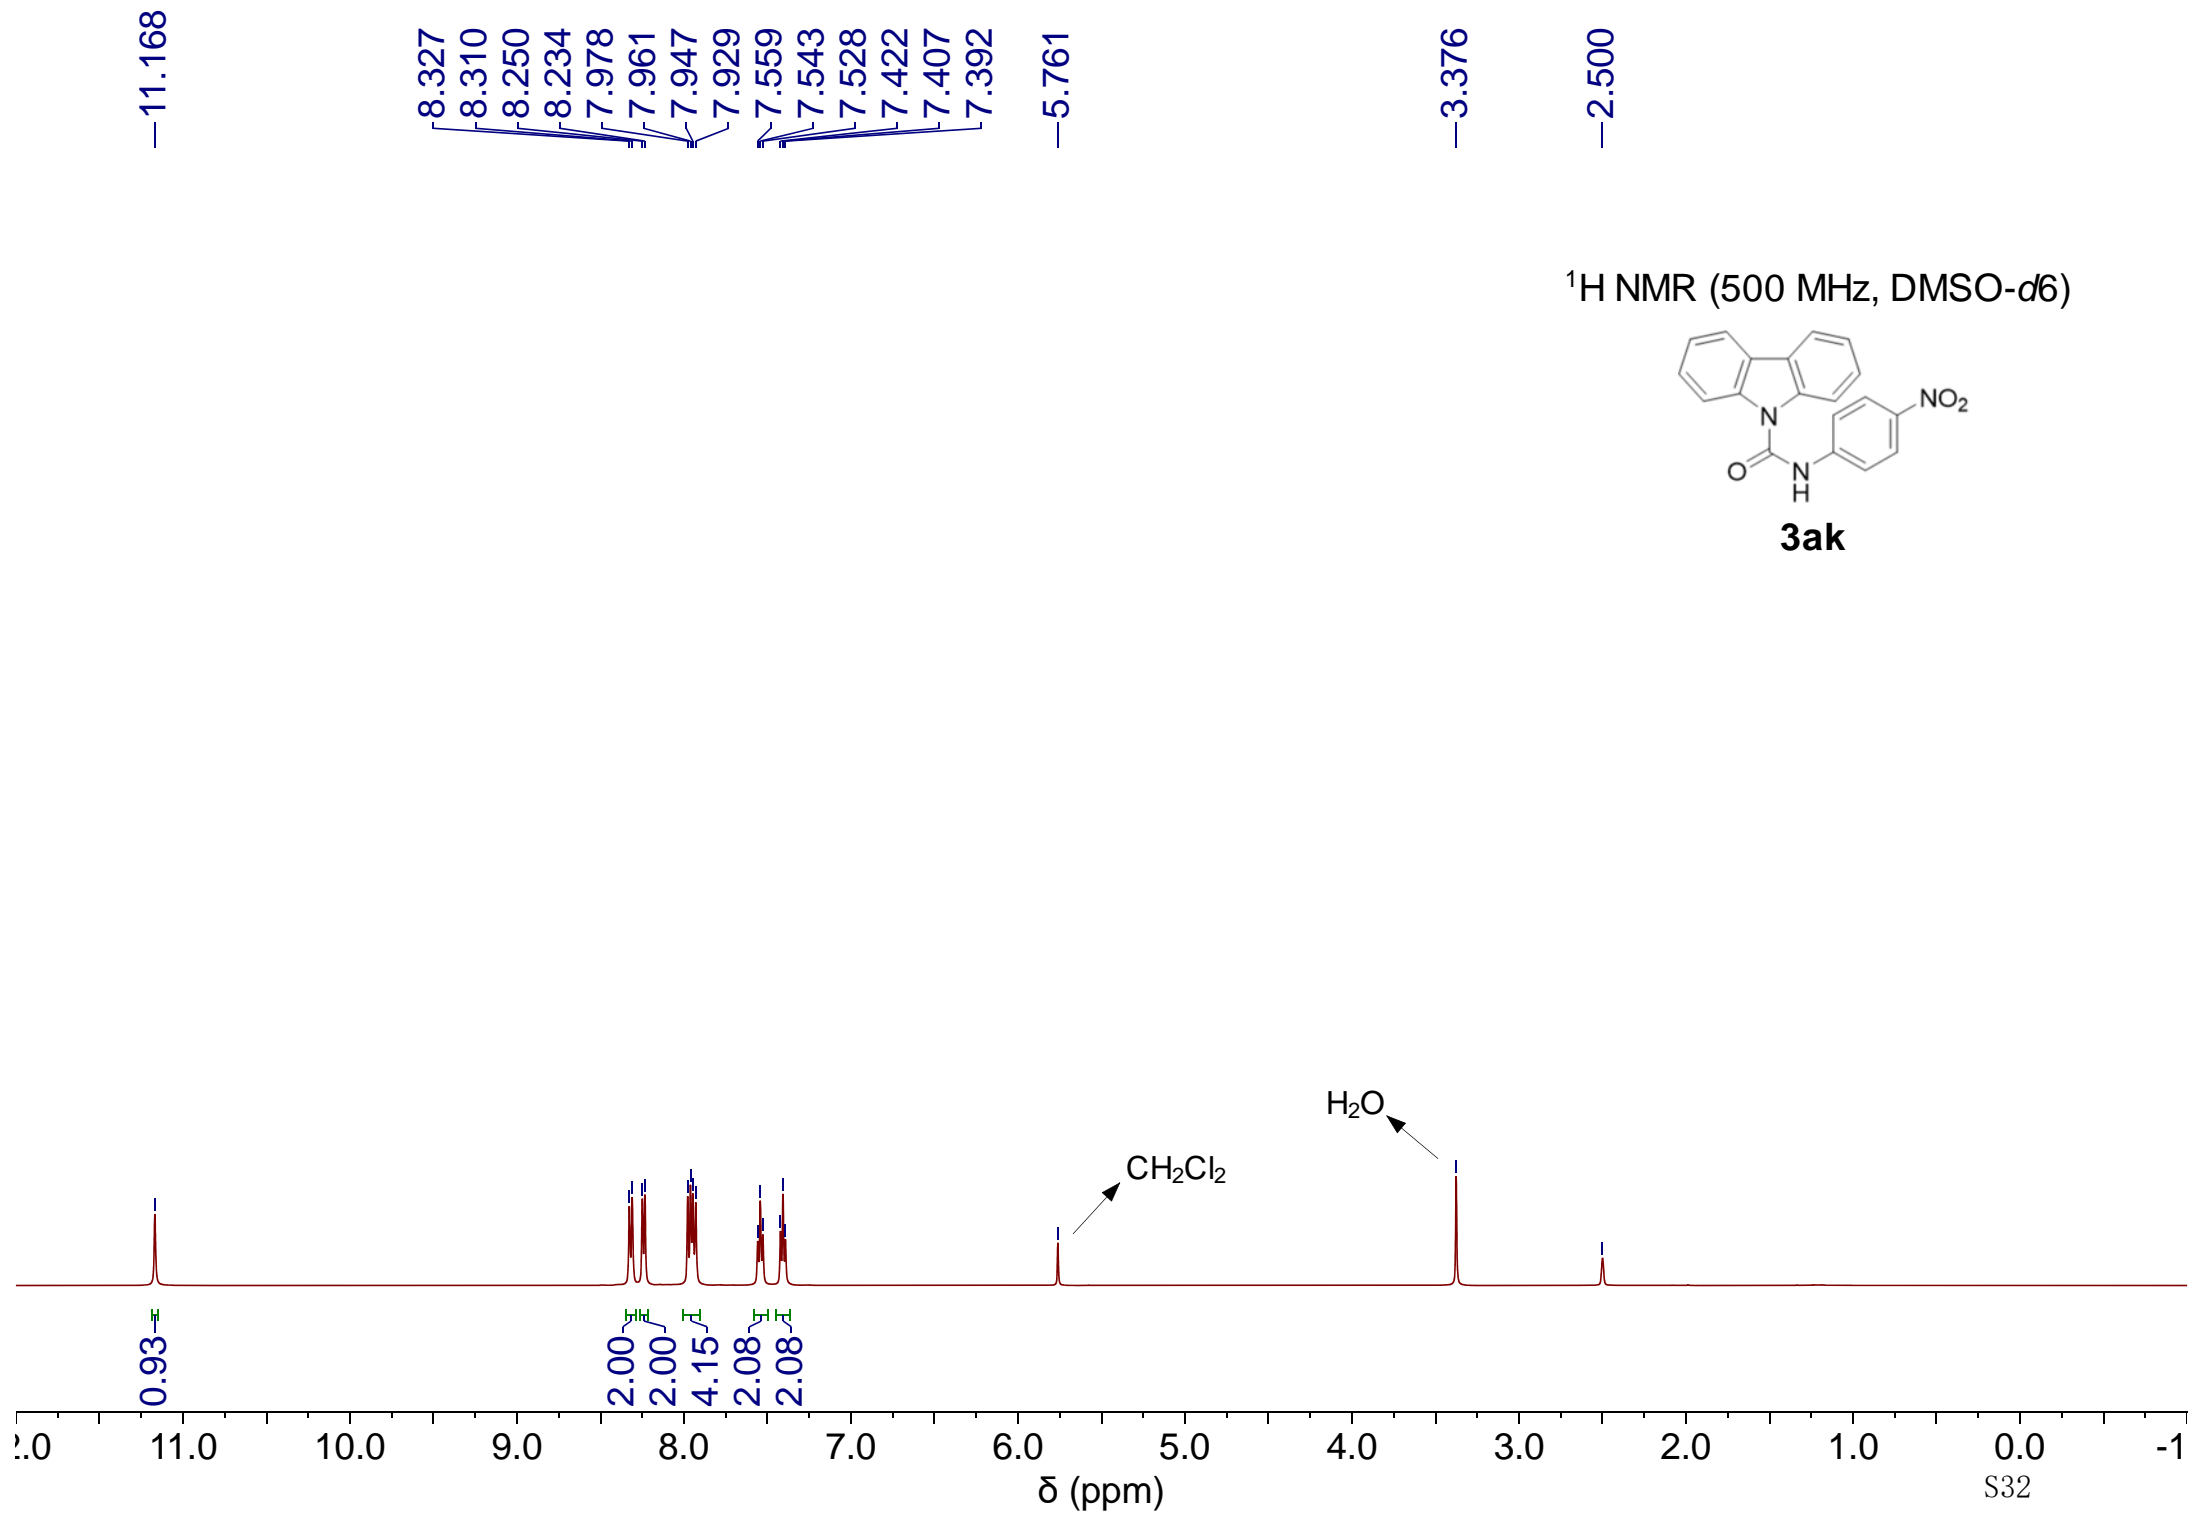

<sup>1</sup>H NMR (500 MHz, DMSO-*d*<sub>6</sub>)

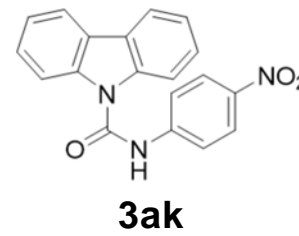

150.06  
145.04  
142.66  
137.78  
127.01  
125.06  
124.42  
122.58  
120.50  
119.62  
114.13

54.96  
40.02  
39.85  
39.69  
39.52  
39.35  
39.19  
39.02

<sup>13</sup>C NMR (126 MHz, DMSO-d<sub>6</sub>)

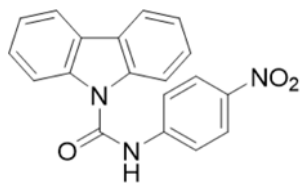

**3ak**

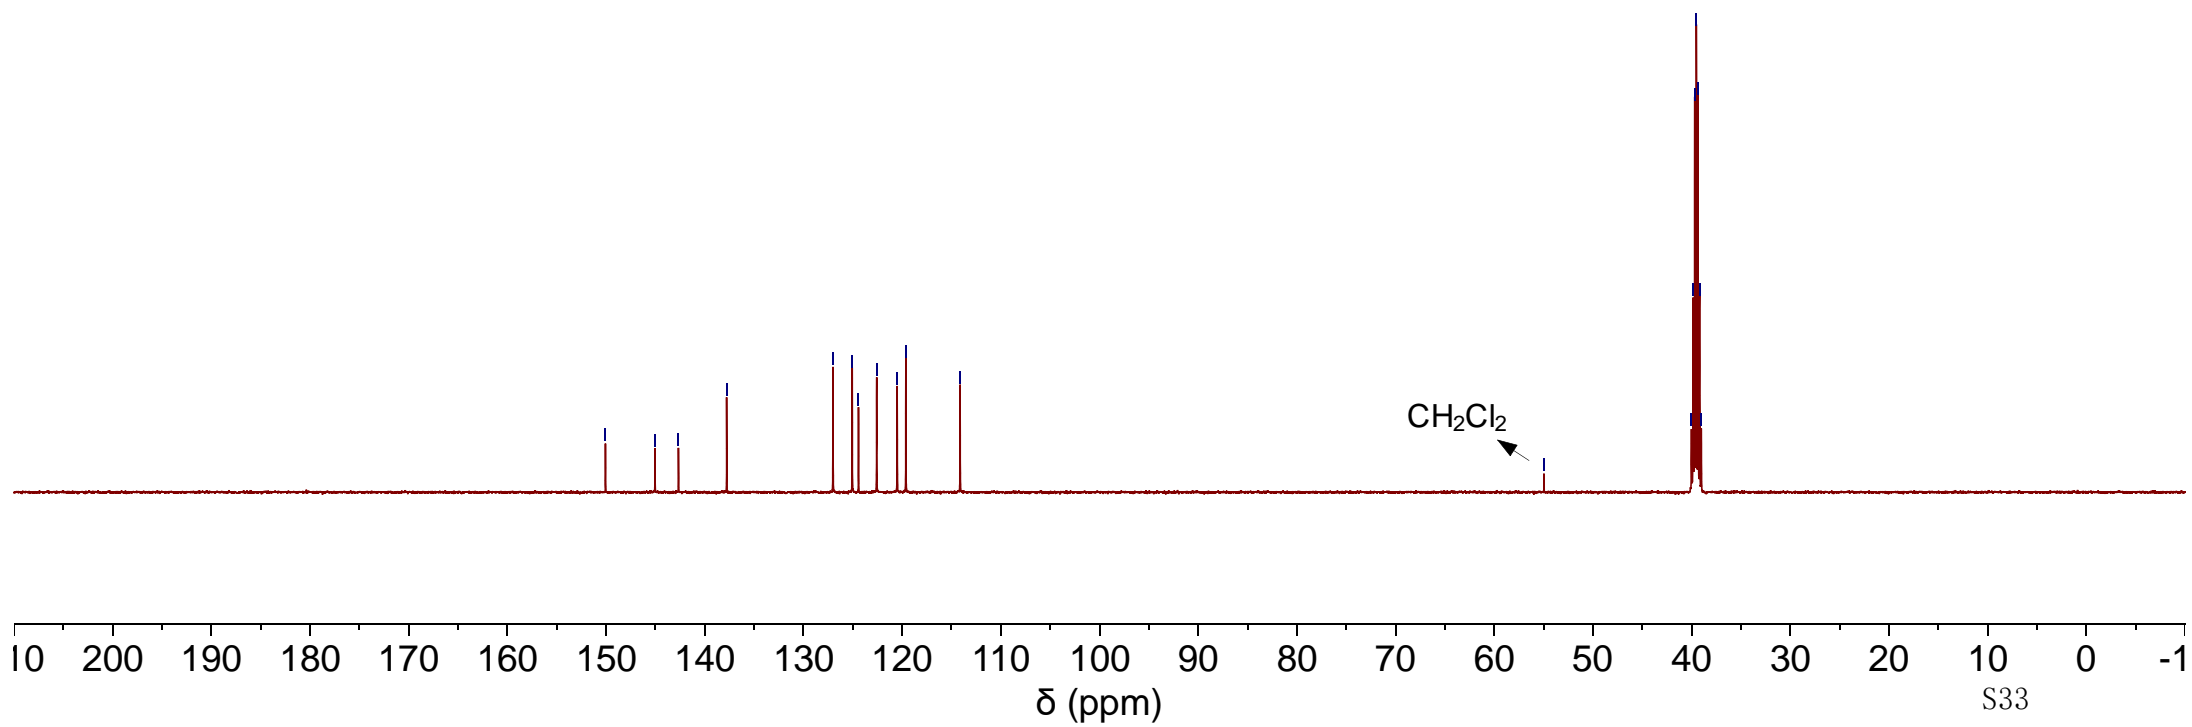

7.939  
7.937  
7.922  
7.905  
7.411  
7.408  
7.396  
7.394  
7.380  
7.377  
7.275  
7.260  
7.245  
5.780

3.539  
3.528  
3.524  
3.513  
3.510  
3.498  
3.495  
3.484

1.306  
1.292  
1.277

<sup>1</sup>H NMR (500 MHz, CDCl<sub>3</sub>)

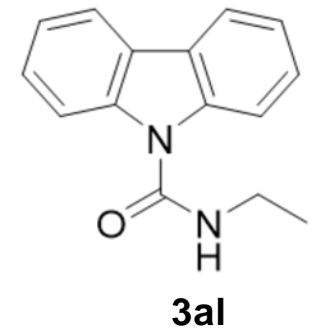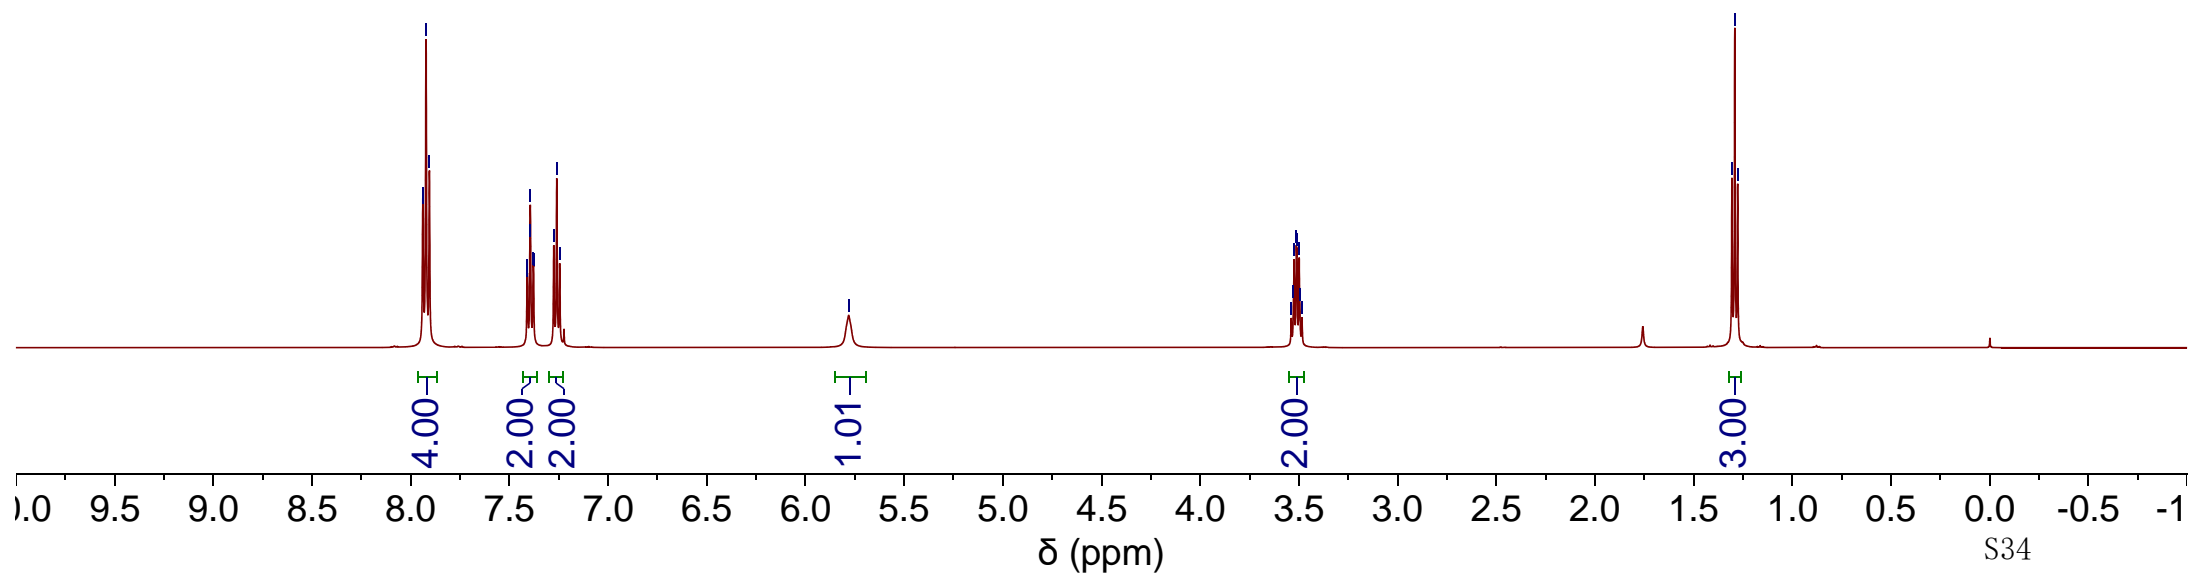

<sup>1</sup>H NMR (500 MHz, CDCl<sub>3</sub>)

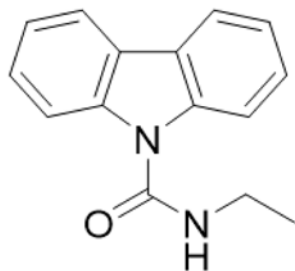

**3al**

—152.77

—138.32

∧126.84

∧124.99

∧122.12

∧120.15

∧113.46

∧77.41

∧77.16

∧76.91

—35.91

—15.10

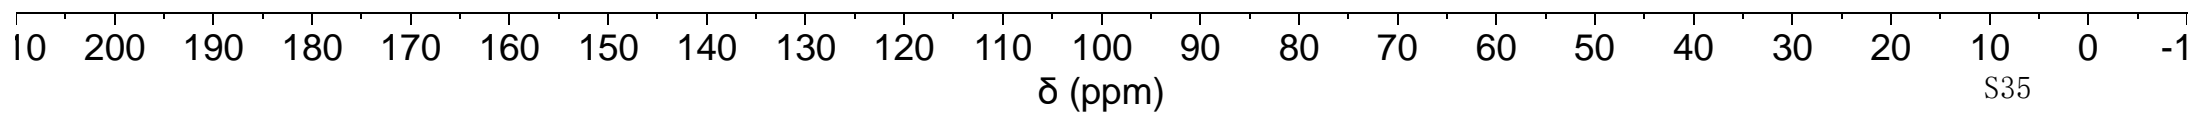

8.331  
8.193  
8.178  
7.935  
7.918  
7.520  
7.504  
7.488  
7.349  
7.334  
7.319

3.420  
3.407  
3.393  
3.380  
3.357  
2.506  
2.502  
2.500  
2.495  
2.491  
1.695  
1.680  
1.665  
1.650  
1.635  
1.485  
1.470  
1.455  
1.440  
1.425  
1.411  
0.982  
0.968  
0.953

<sup>1</sup>H NMR (500 MHz, DMSO-*d*<sub>6</sub>)

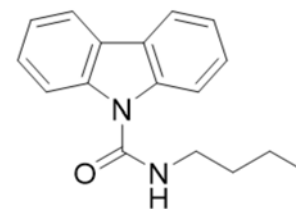

**3am**

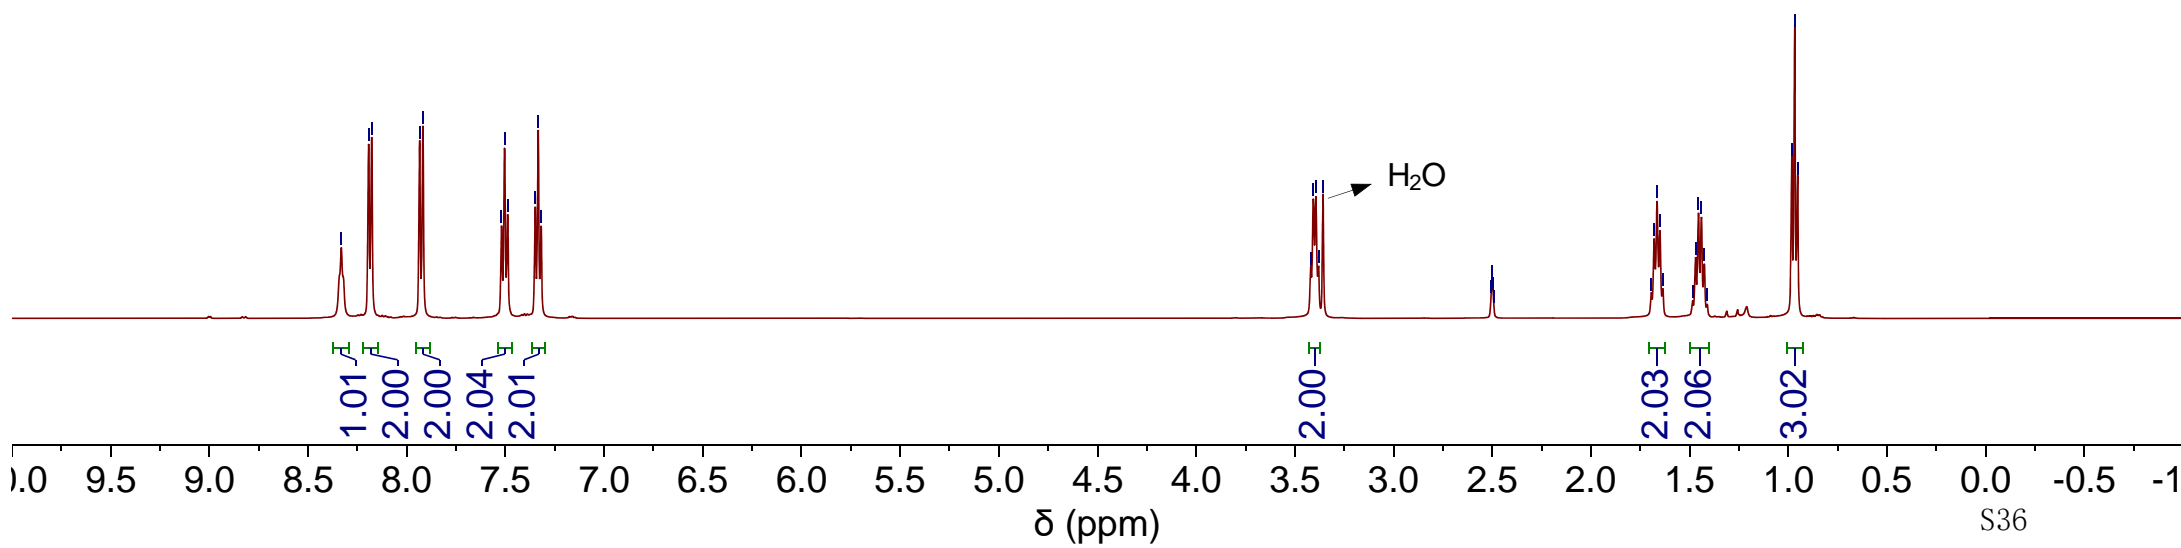

<sup>13</sup>C NMR (126 MHz, DMSO-*d*<sub>6</sub>)

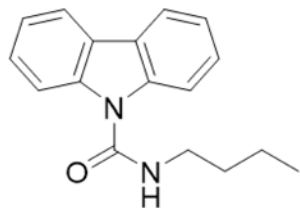

**3am**

—152.15

—137.97

—126.52

—123.79

—121.50

—120.20

—113.51

40.06

40.02

39.85

39.69

39.52

39.35

39.19

39.02

31.21

—19.75

—13.73

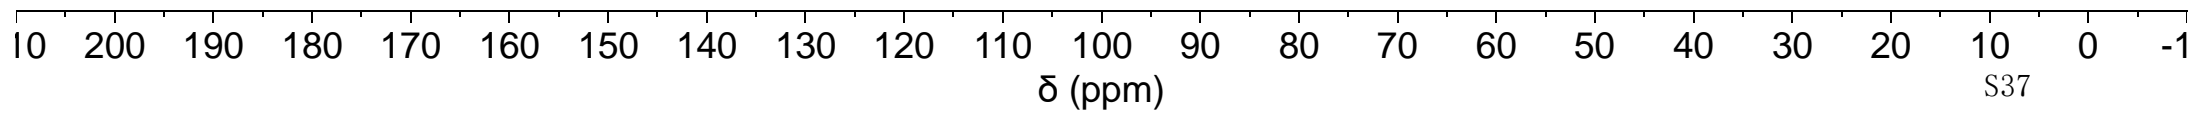

7.988  
7.973  
7.959  
7.942  
7.465  
7.448  
7.434  
7.320  
7.305  
7.290  
7.260  
5.766  
5.751  
4.420  
4.407  
4.393  
4.380  
2.185  
2.174  
2.162  
2.149  
2.138  
2.125  
1.806  
1.800  
1.791  
1.784  
1.770  
1.750  
1.746  
1.730  
1.727  
1.722  
1.714  
1.706  
1.700  
1.691  
1.656  
1.644  
1.632  
1.619  
1.607  
1.595

<sup>1</sup>H NMR (500 MHz, CDCl<sub>3</sub>)

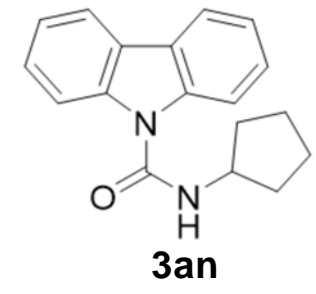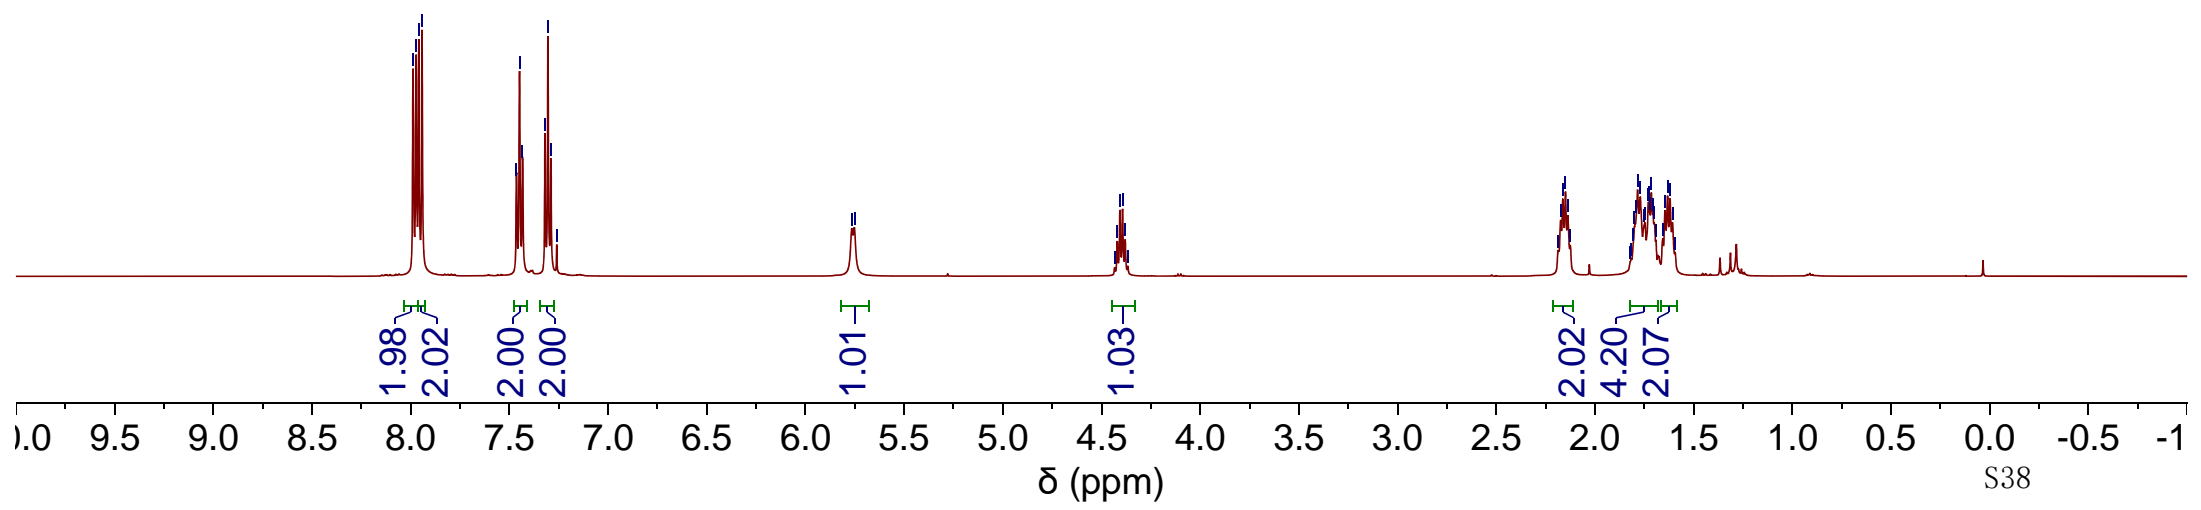

<sup>13</sup>C NMR (126 MHz, CDCl<sub>3</sub>)

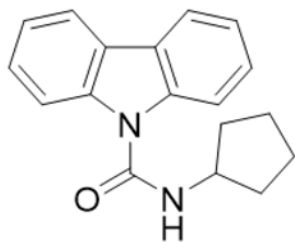

**3a**

—152.33

—138.36

∧126.85

∧124.97

∧122.09

∧120.18

∧113.39

∧77.41

∧77.16

∧76.91

—52.88

—33.26

—23.78

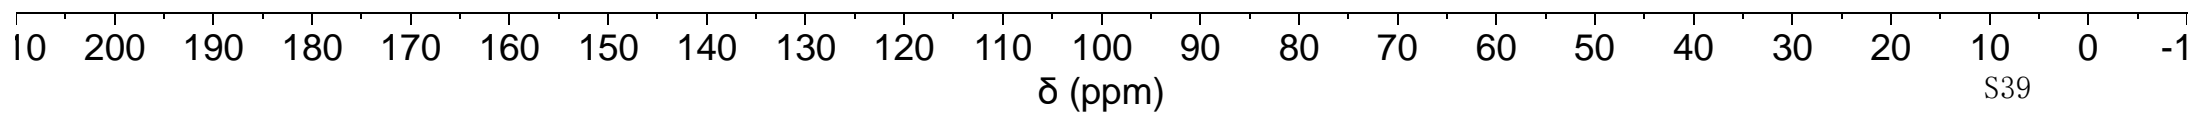



8.022  
8.007  
7.998  
7.981  
7.481  
7.465  
7.449  
7.338  
7.323  
7.308  
7.261

5.664  
5.649

4.029  
4.021  
4.014  
4.007  
4.000  
3.992  
3.985  
3.978  
3.970

2.190  
2.180  
2.165  
2.156  
1.826  
1.798  
1.710  
1.683  
1.501  
1.477  
1.451  
1.401  
1.395  
1.378  
1.371  
1.355  
1.348  
1.275  
1.251

<sup>1</sup>H NMR (500 MHz, CDCl<sub>3</sub>)

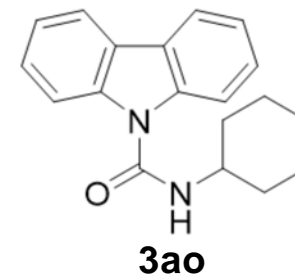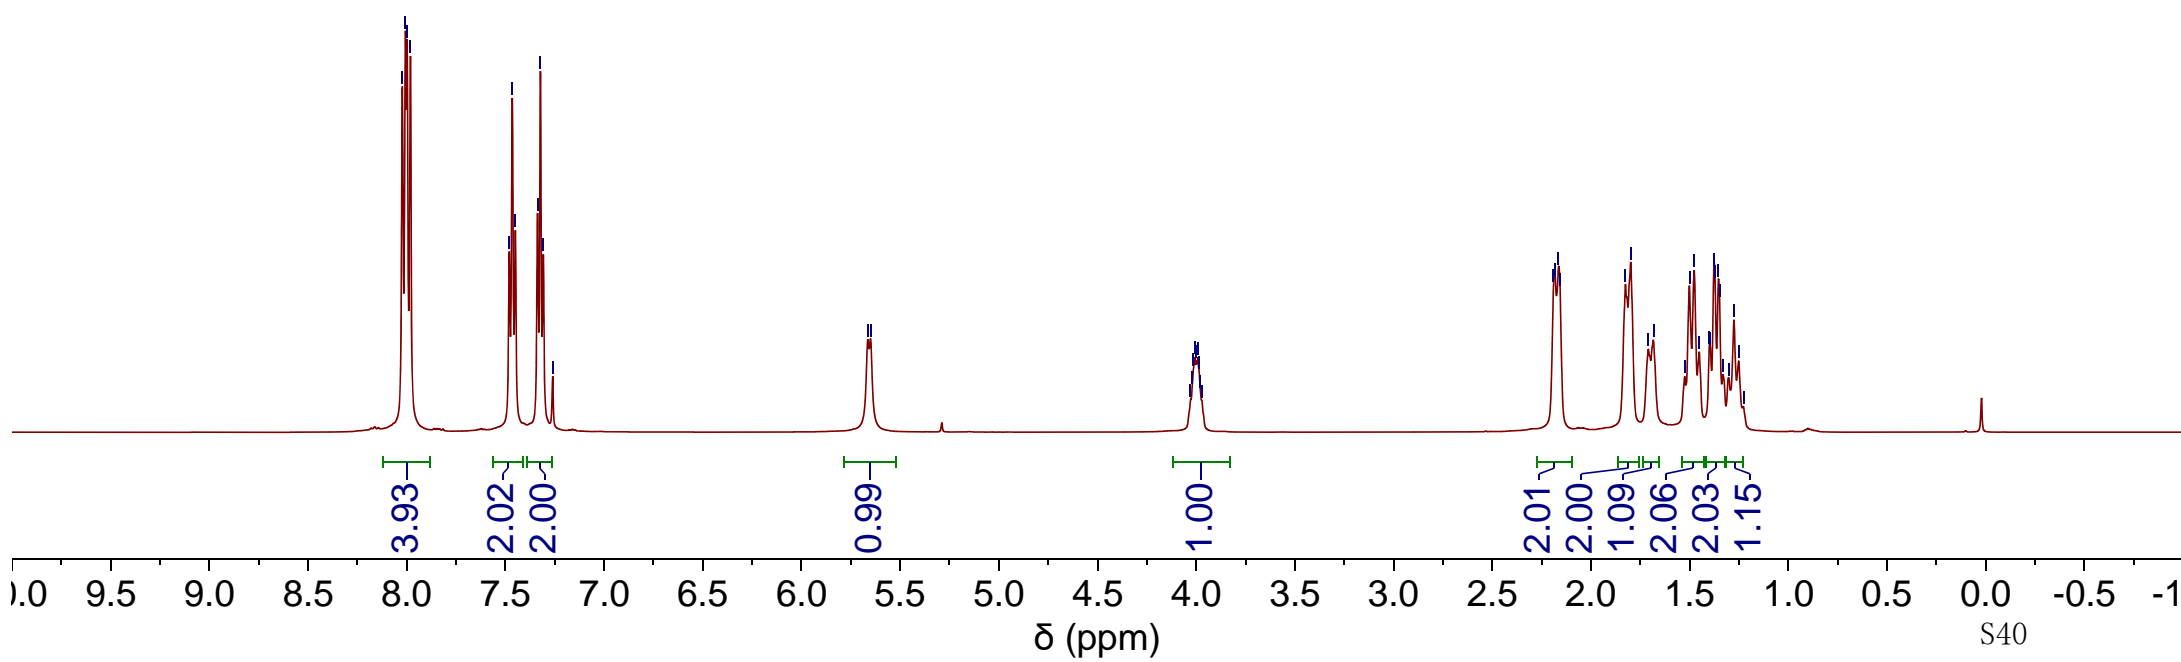

<sup>13</sup>C NMR (126 MHz, CDCl<sub>3</sub>)

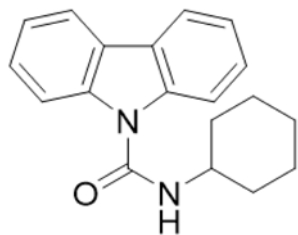

**3ao**

—151.91  
—138.47  
∧126.93  
∧125.07  
∧122.15  
∧120.27  
∧113.49  
  
∧77.42  
∧77.16  
∧76.91  
  
—50.05  
  
—33.43  
∧25.61  
∧24.98

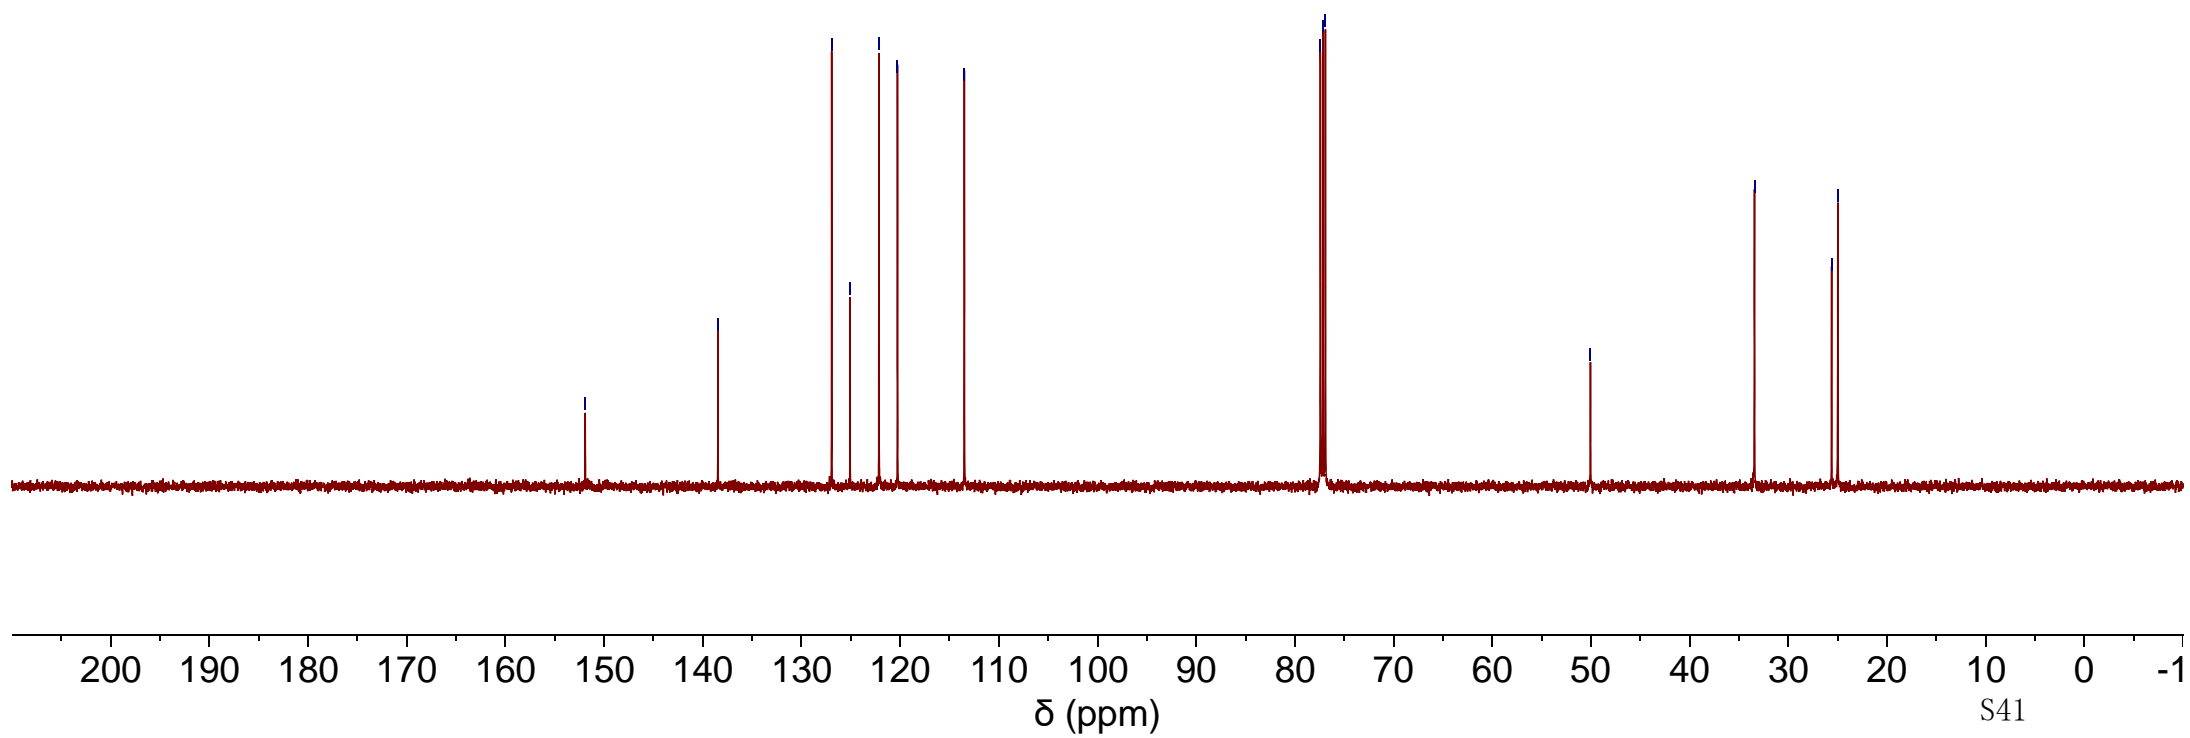

8.301  
8.286  
8.193  
8.178  
7.907  
7.890  
7.516  
7.501  
7.485  
7.344  
7.329  
7.314

4.150  
4.137  
4.123  
4.110  
4.096  
4.083  
4.069  
4.056  
-3.366

-2.500

1.313  
1.300

<sup>1</sup>H NMR (500 MHz, DMSO-*d*<sub>6</sub>)

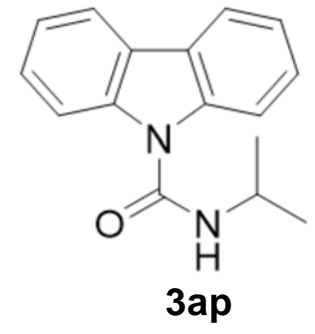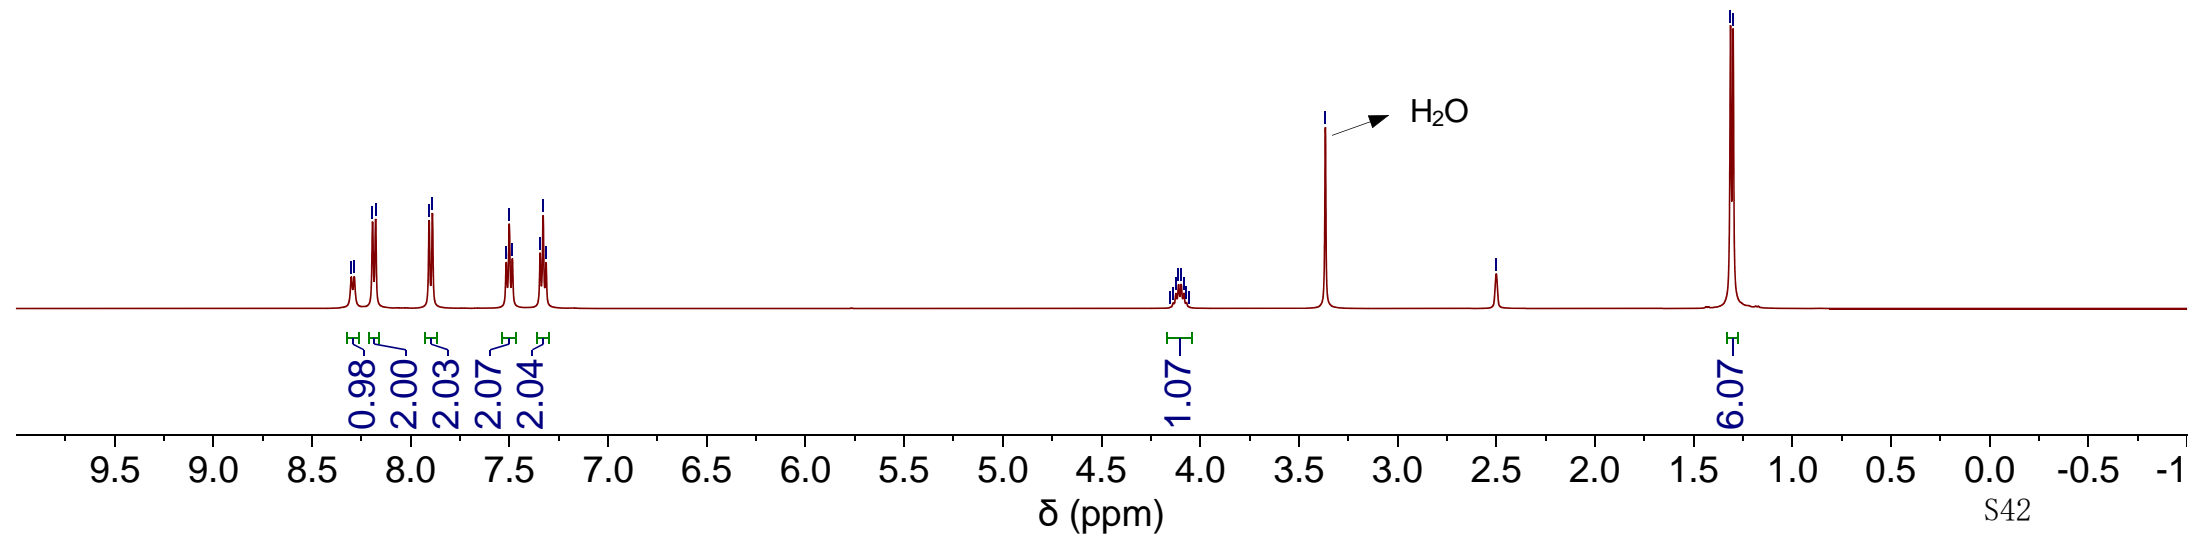

<sup>13</sup>C NMR (126 MHz, DMSO-*d*<sub>6</sub>)

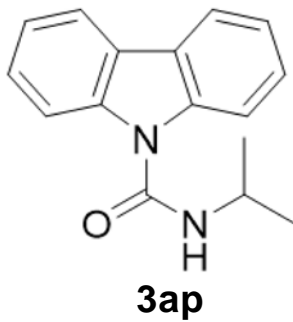

—151.31

—138.03

∧126.54

∧123.73

∧121.48

∧120.25

∧113.51

42.71

40.02

39.85

39.69

39.52

39.35

39.19

39.02

—22.29

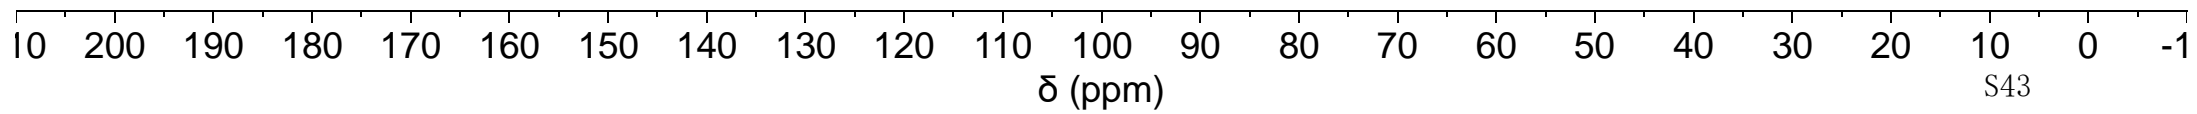

8.540  
8.202  
8.186  
7.967  
7.955  
7.526  
7.510  
7.494  
7.360  
7.345  
7.330  
6.085  
6.074  
6.064  
6.052  
6.040  
6.029  
6.019  
6.009  
6.005  
5.352  
5.318  
5.215  
5.194  
4.038  
3.388  
2.507  
2.503  
2.500  
2.496

<sup>1</sup>H NMR (500 MHz, DMSO-*d*<sub>6</sub>)

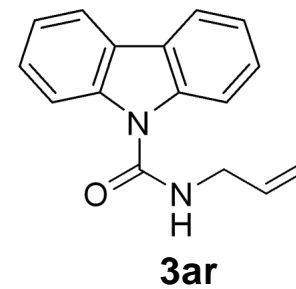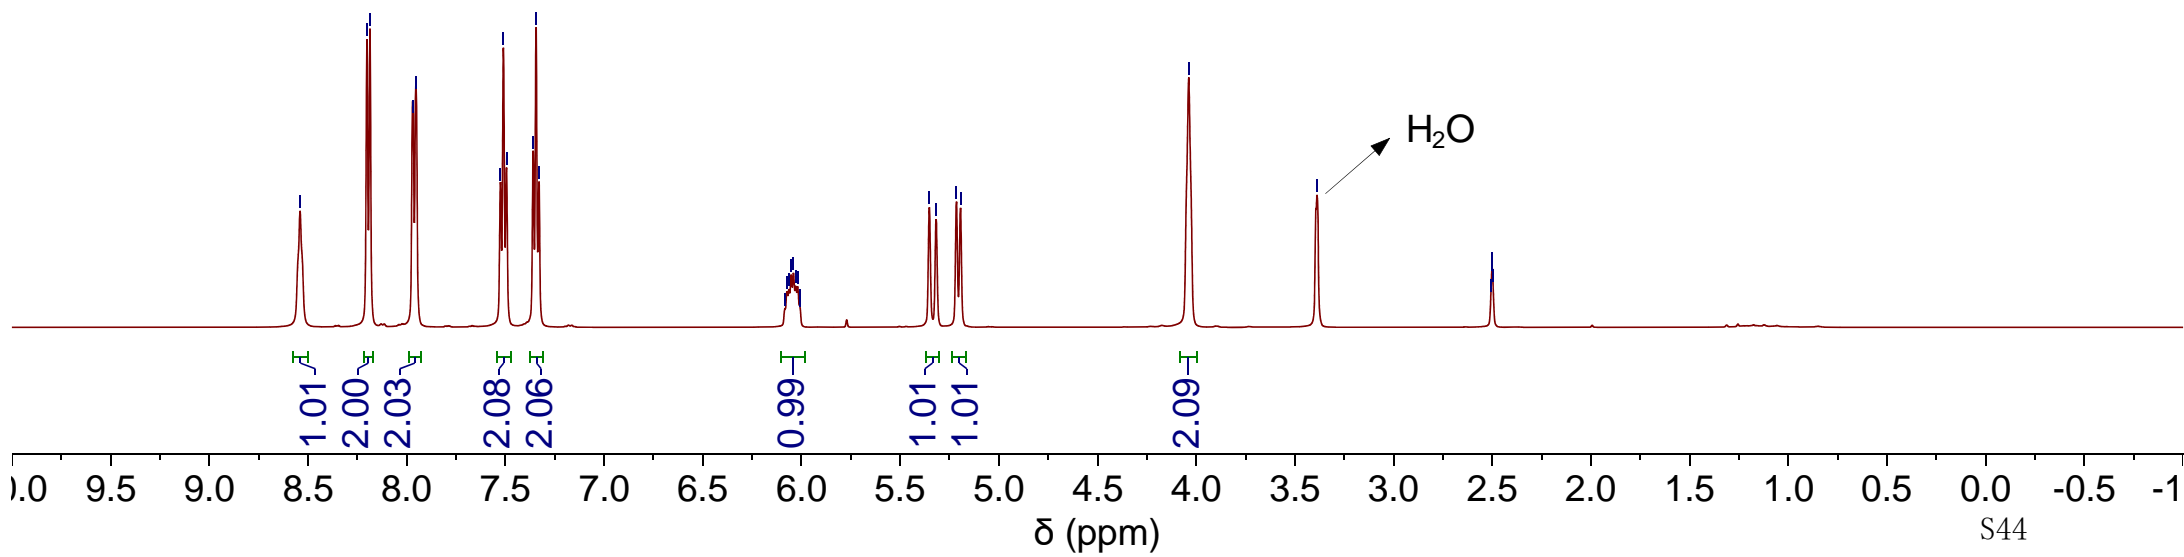

<sup>13</sup>C NMR (126 MHz, DMSO-*d*<sub>6</sub>)

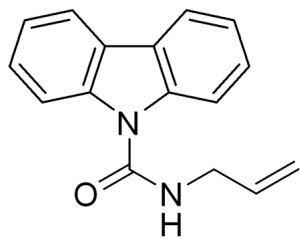

**3ar**

—152.19  
/ 137.95  
/ 135.03  
/ 126.62  
/ 123.91  
/ 121.69  
/ 120.26  
/ 115.95  
/ 113.69

42.82  
40.02  
39.85  
39.68  
39.52  
39.35  
39.18  
39.02

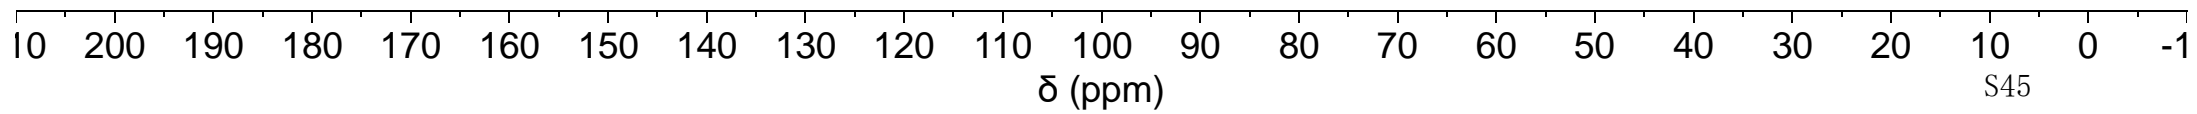

8.530  
8.197  
8.181  
7.945  
7.928  
7.502  
7.486  
7.471  
7.356  
7.341  
7.326  
6.439  
6.404  
6.278  
6.257  
6.243  
6.222  
6.016  
5.995

4.419  
4.408  
4.397  
3.719  
3.709  
3.698  
3.687  
3.373  
2.504  
2.500  
2.496  
2.492

<sup>1</sup>H NMR (500 MHz, DMSO-*d*<sub>6</sub>)

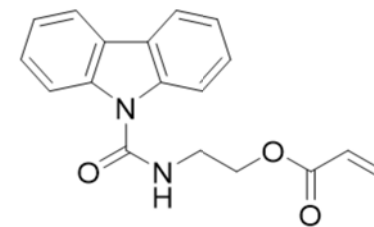

**3as**

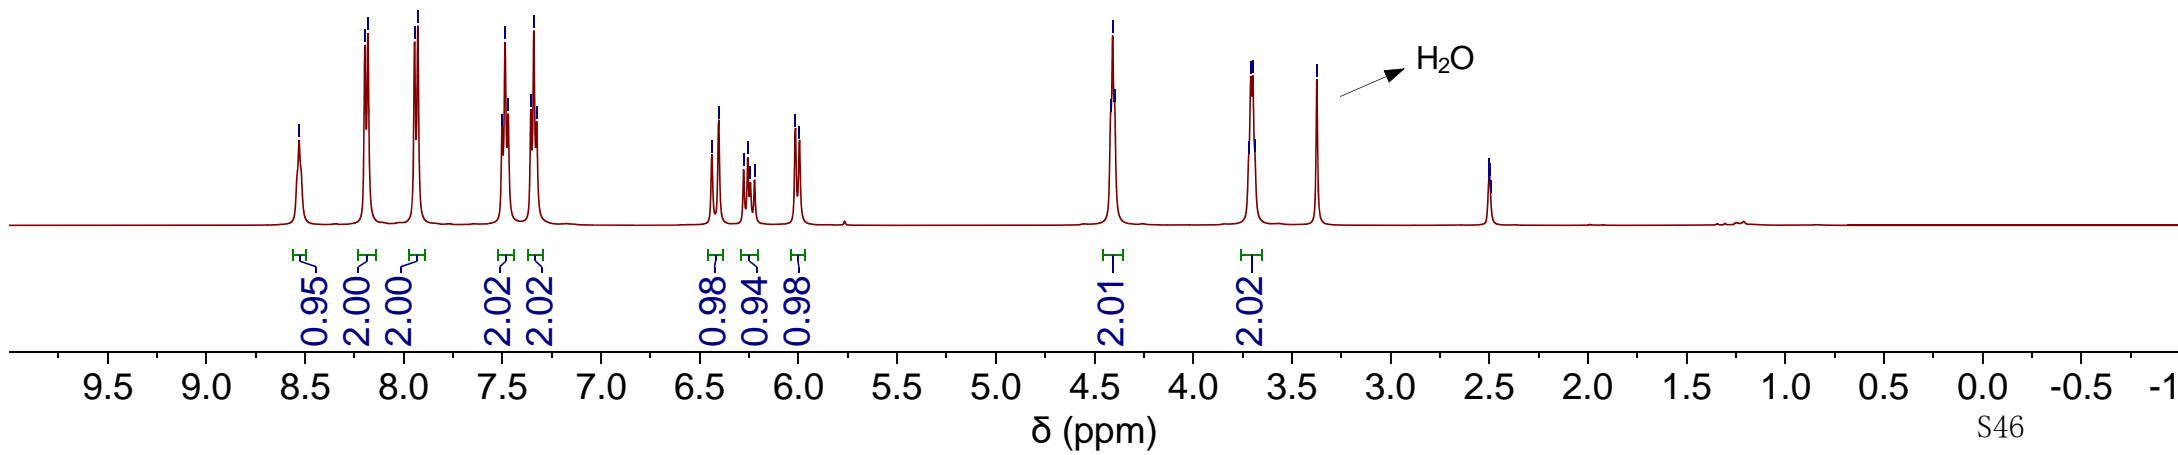

<sup>13</sup>C NMR (126 MHz, DMSO-*d*<sub>6</sub>)

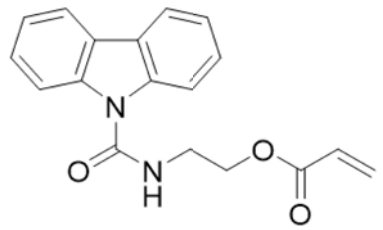

**3as**

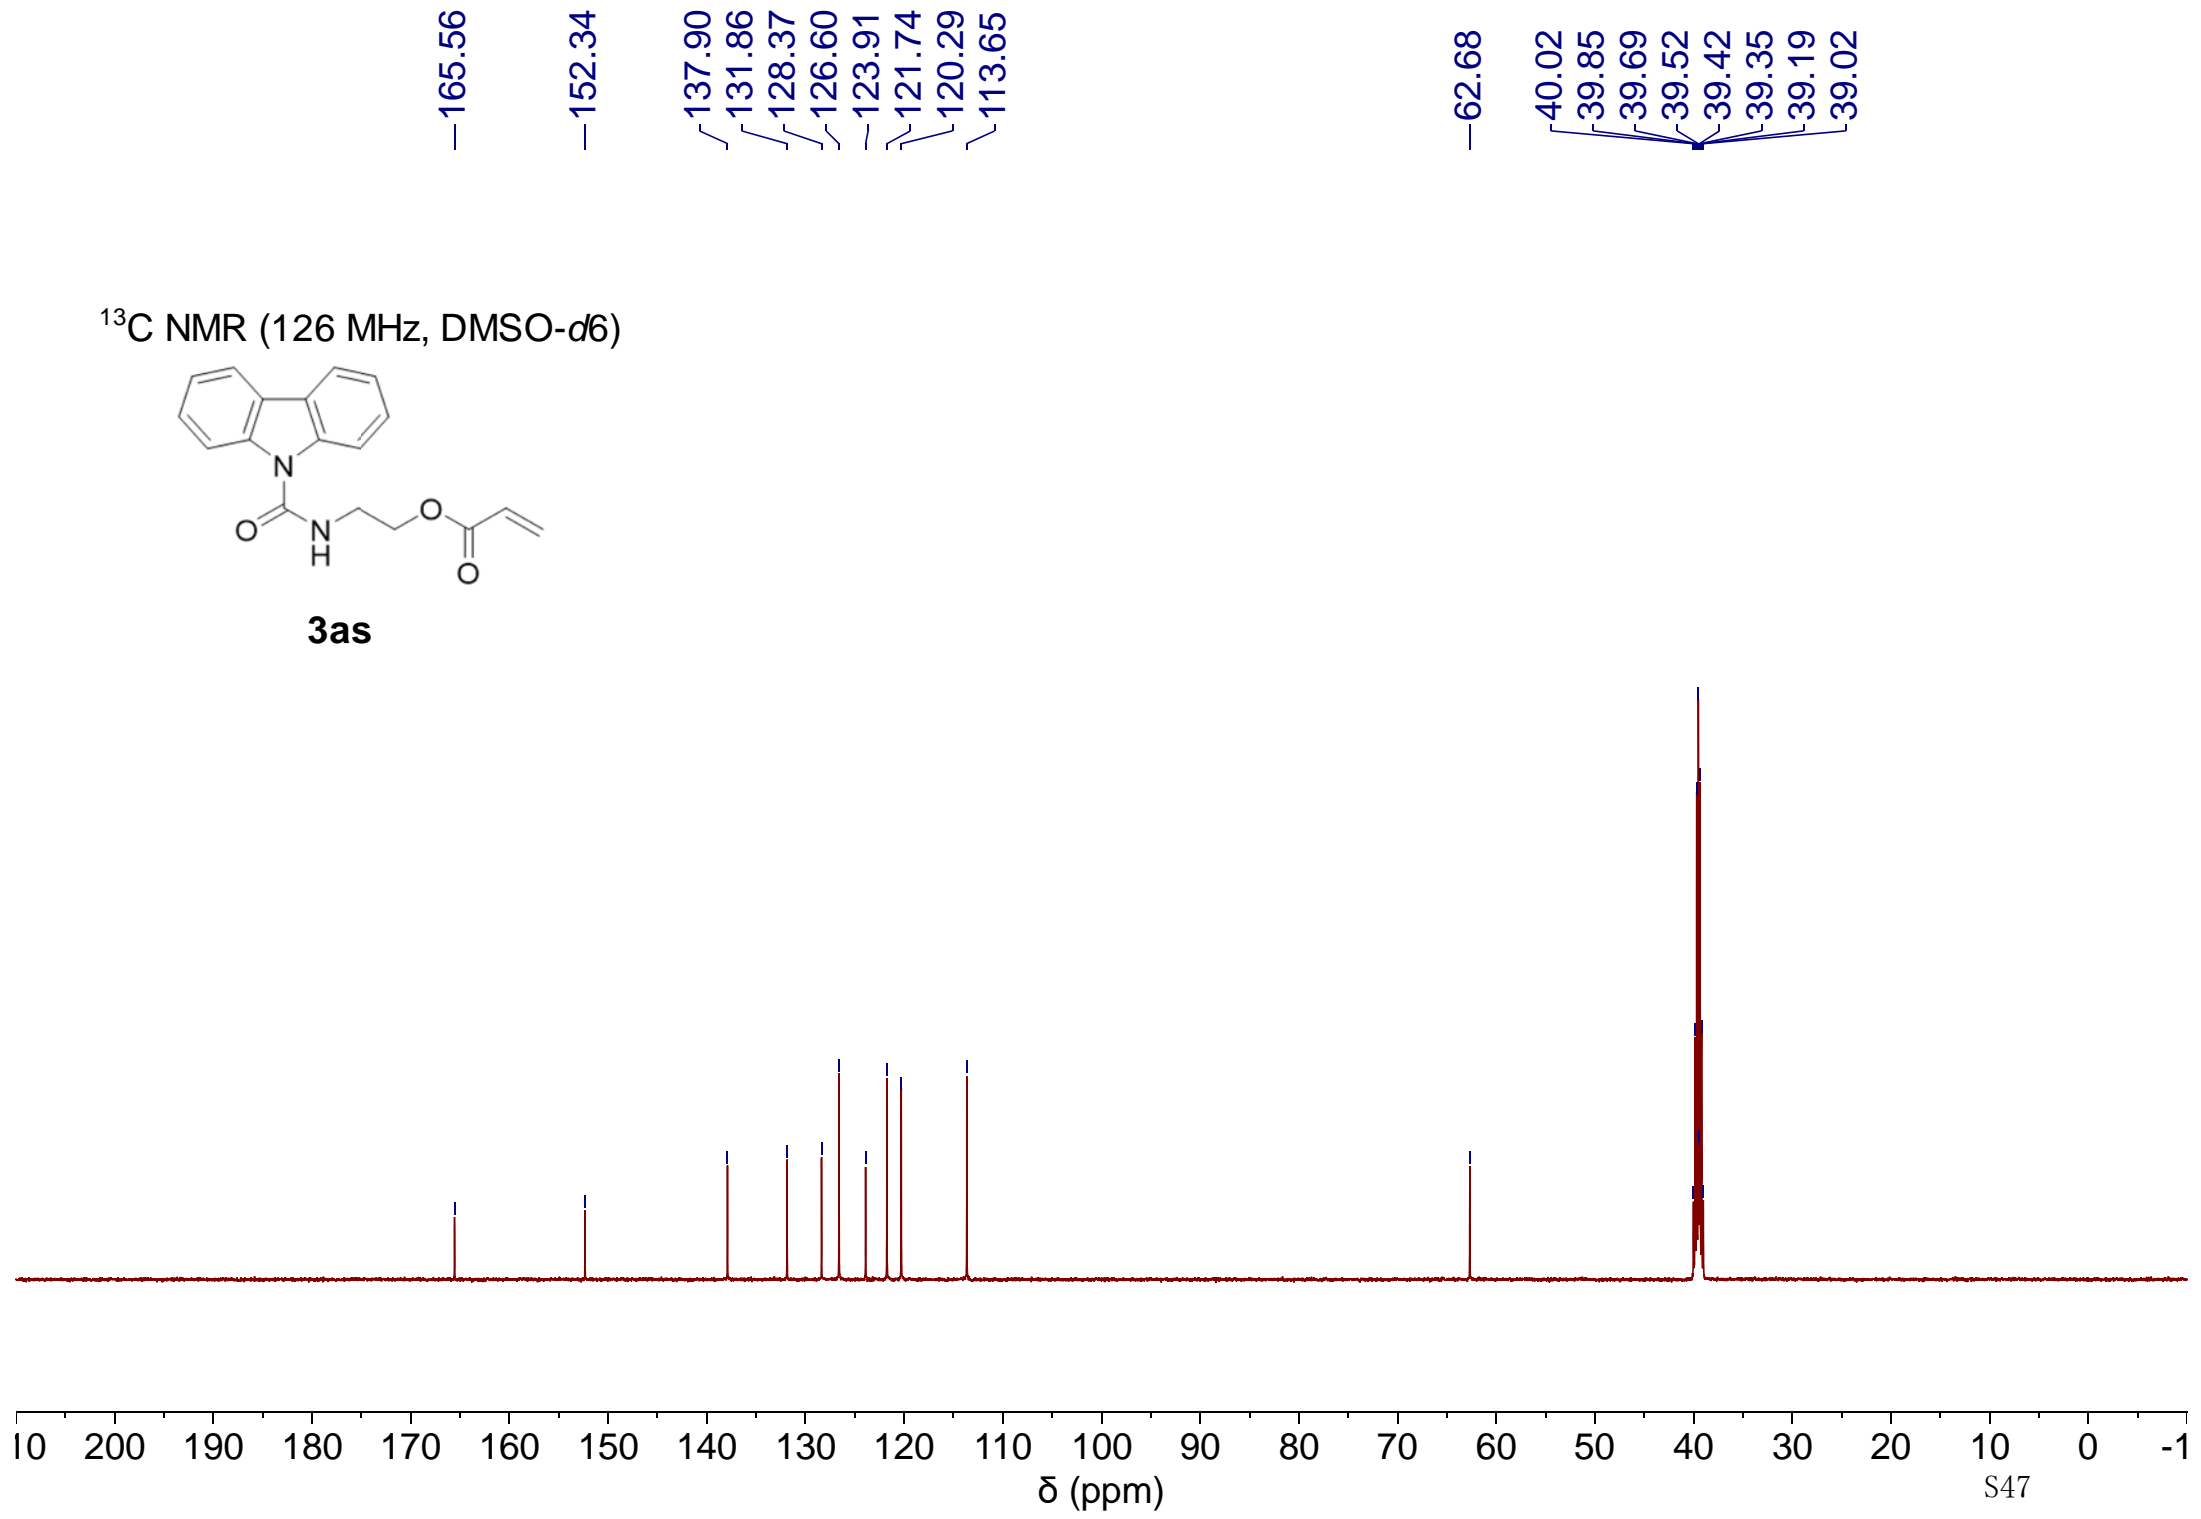



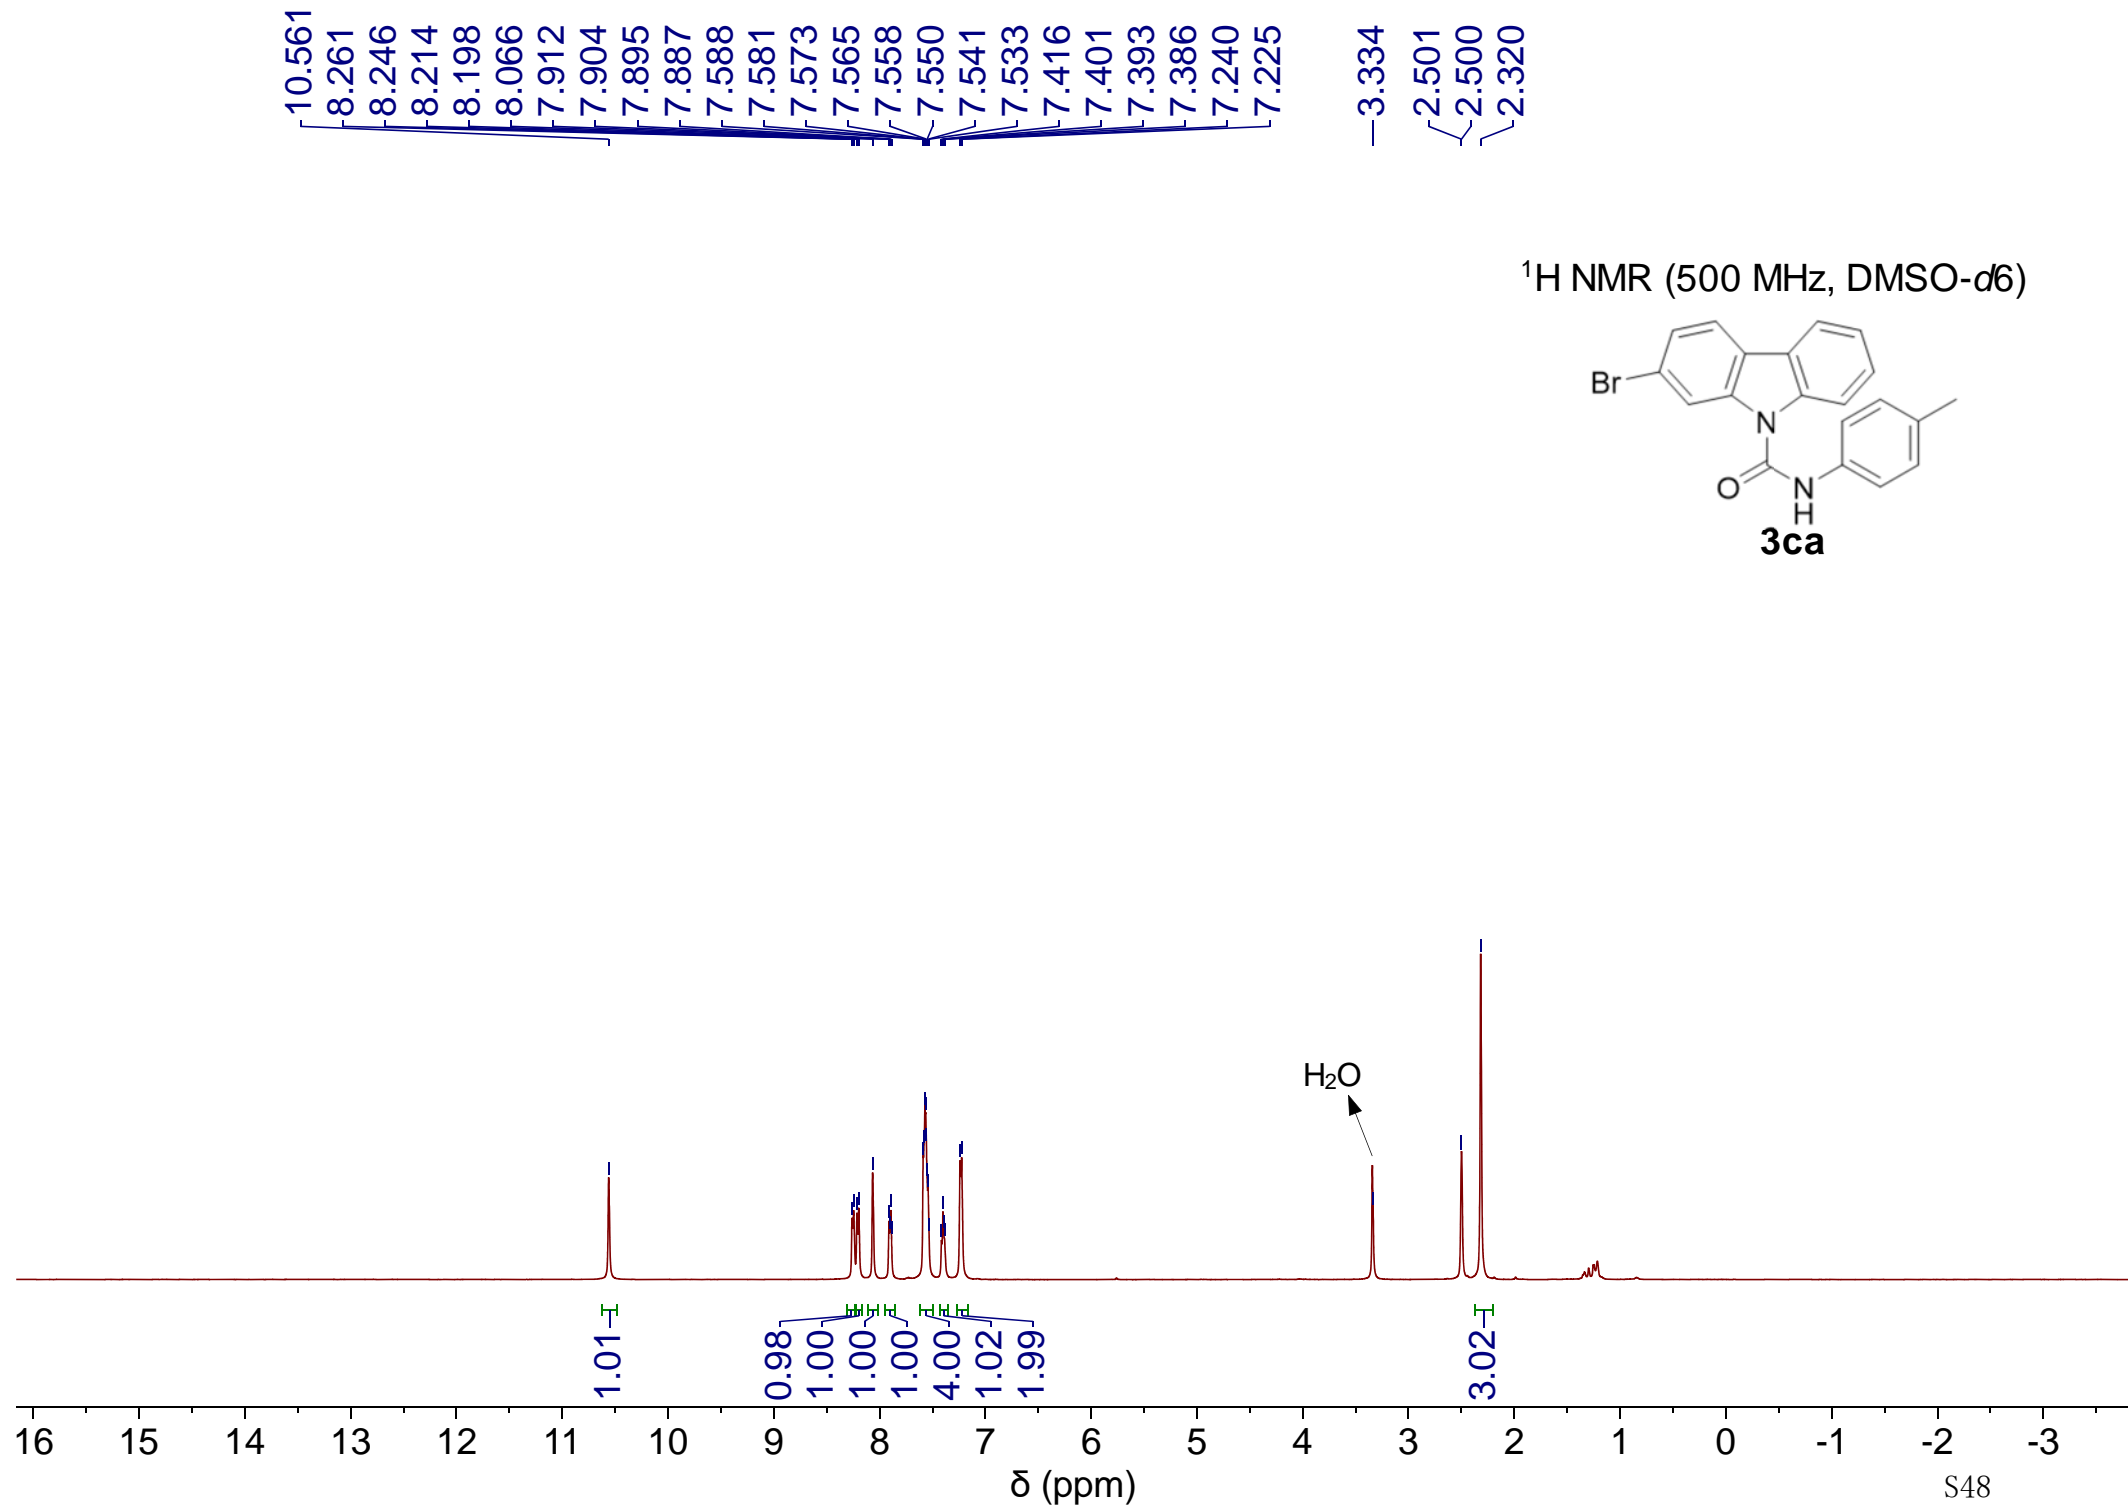

<sup>13</sup>C NMR (126 MHz, DMSO-*d*<sub>6</sub>)

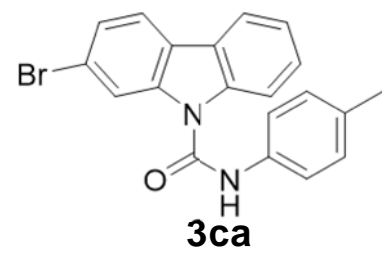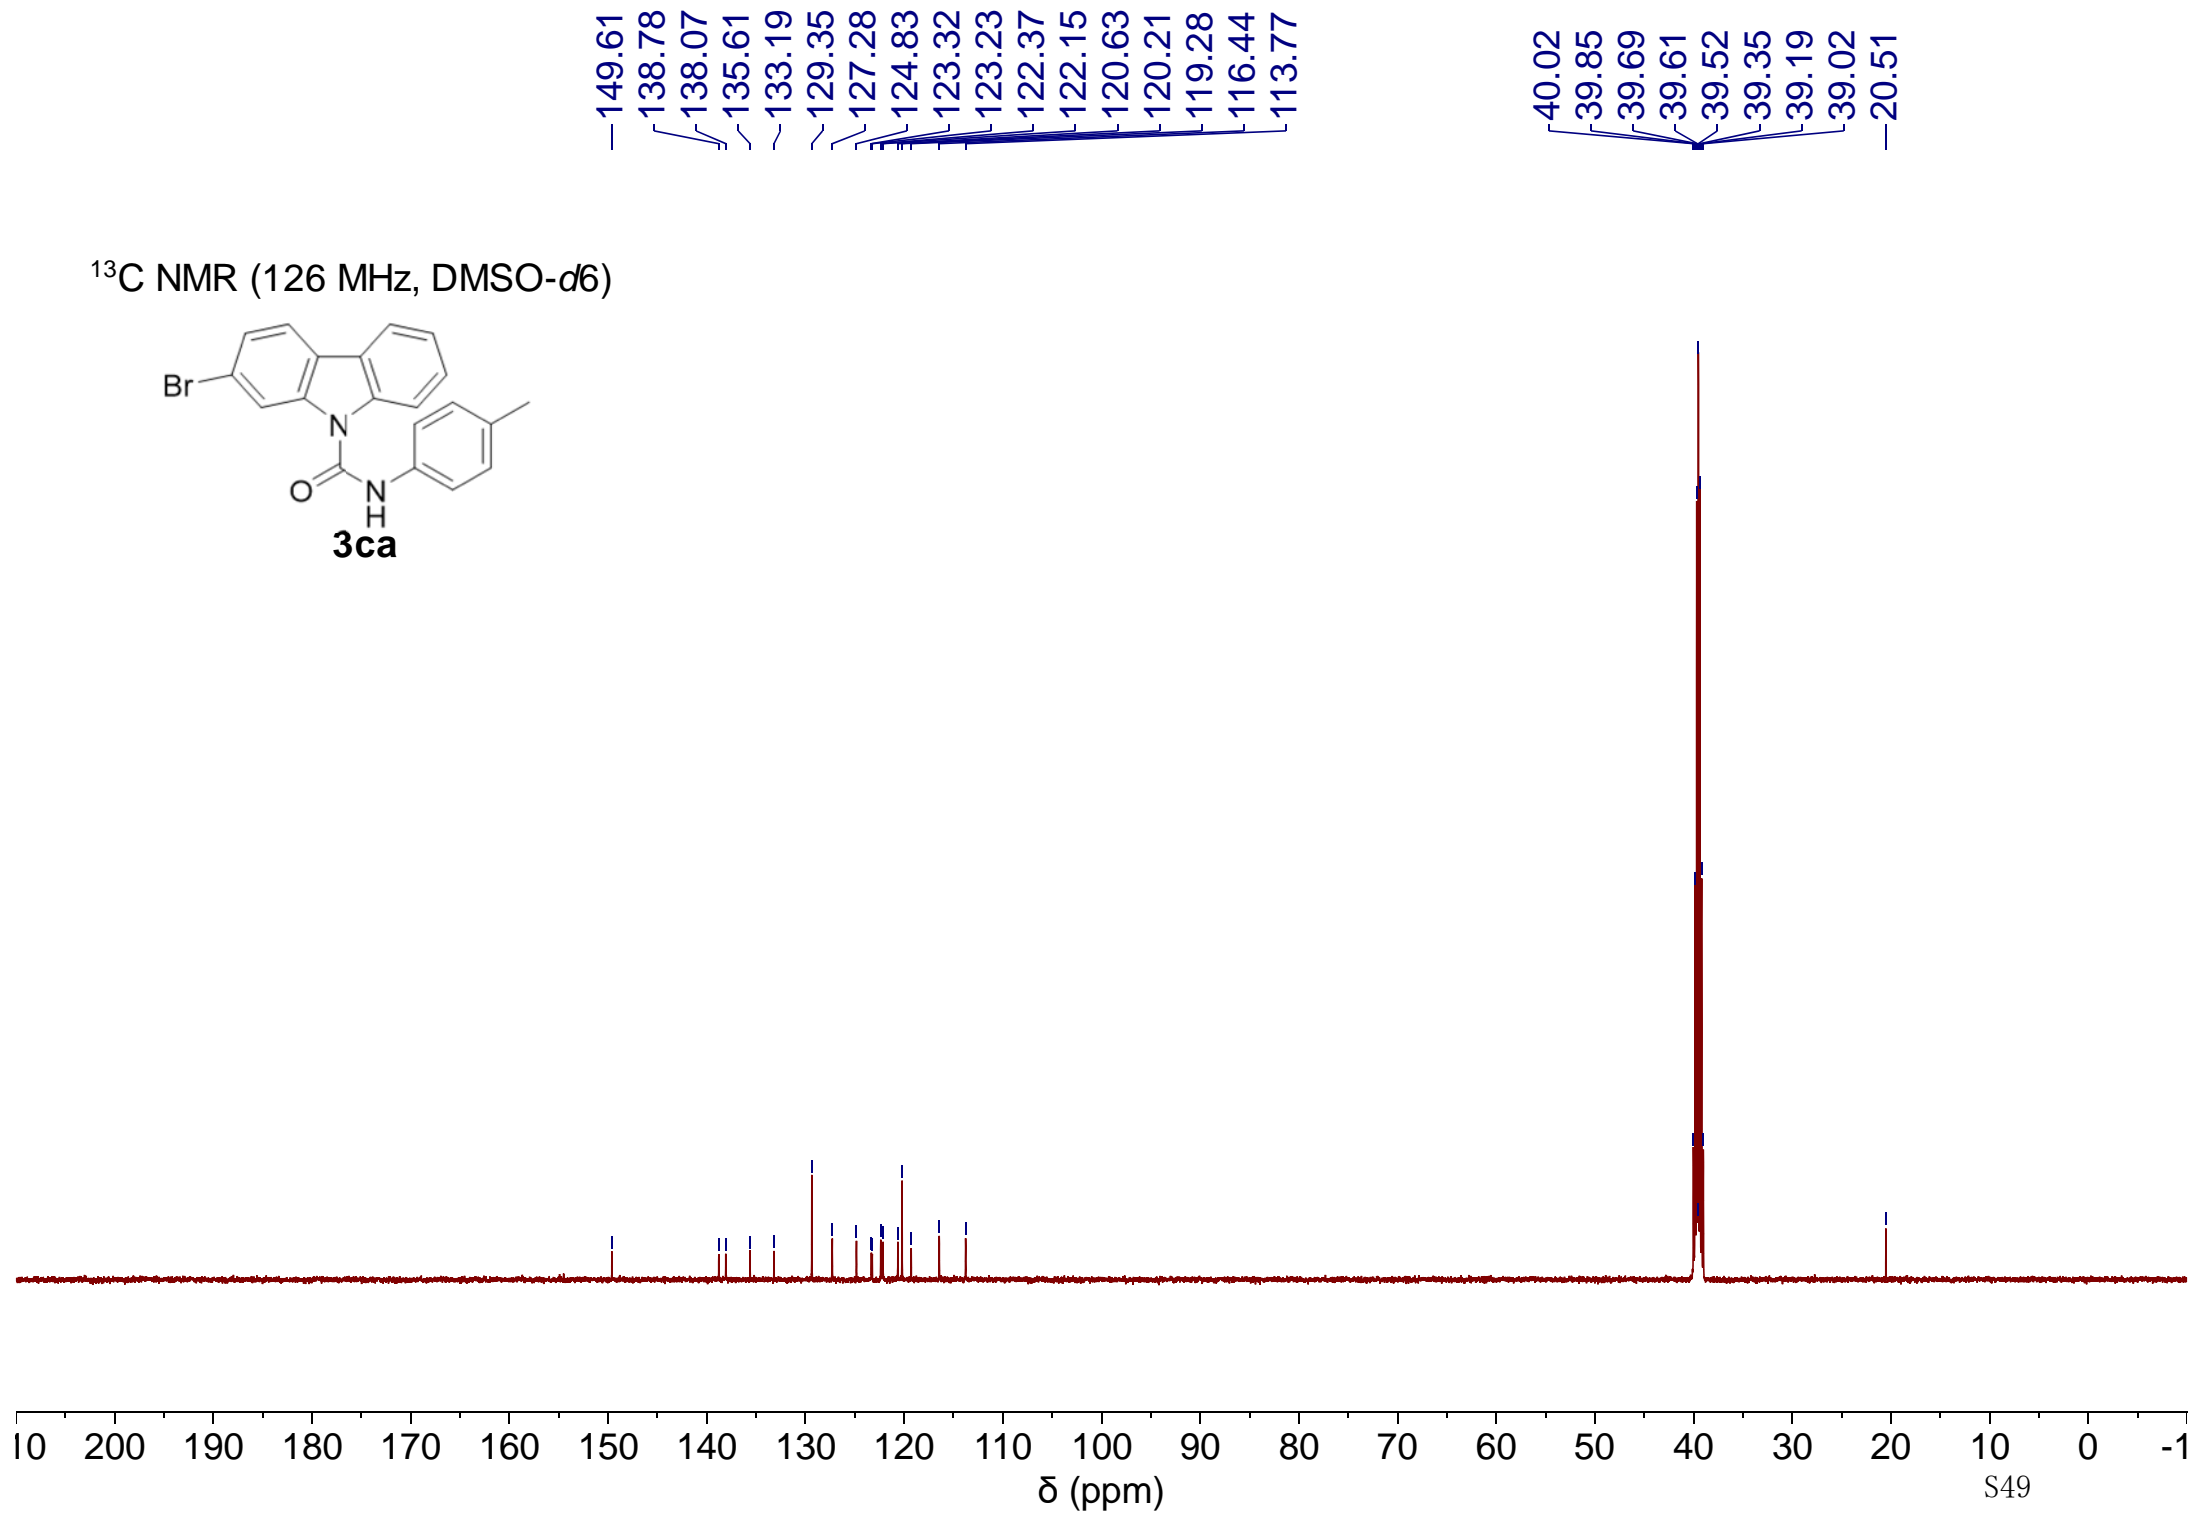

10.510  
8.512  
8.506  
8.299  
8.284  
7.915  
7.898  
7.879  
7.874  
7.861  
7.857  
7.675  
7.669  
7.652  
7.580  
7.564  
7.547  
7.408  
7.393  
7.377  
7.231  
7.215

3.324  
2.505  
2.502  
2.500  
2.497  
2.313

<sup>1</sup>H NMR (500 MHz, DMSO-*d*<sub>6</sub>)

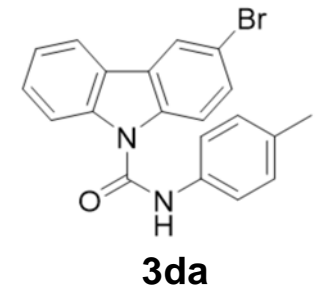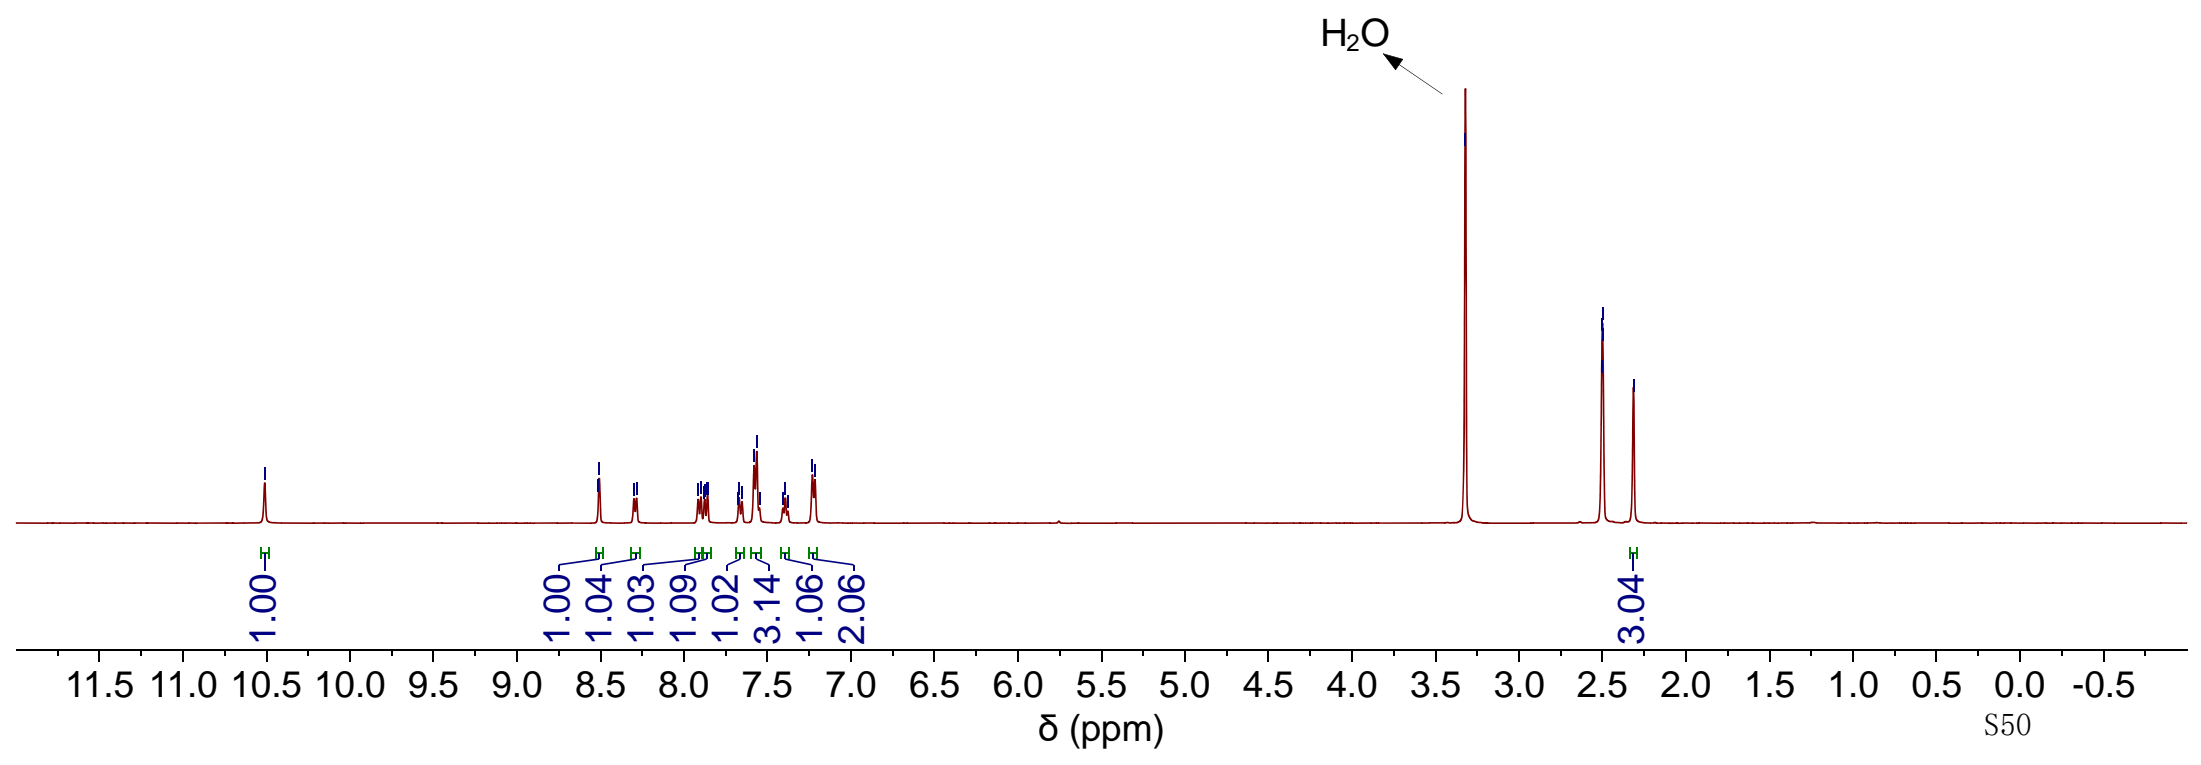

<sup>13</sup>C NMR (126 MHz, DMSO-*d*<sub>6</sub>)

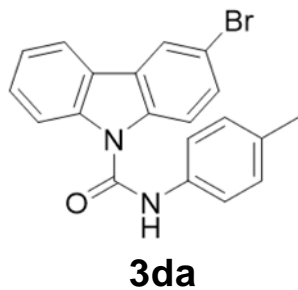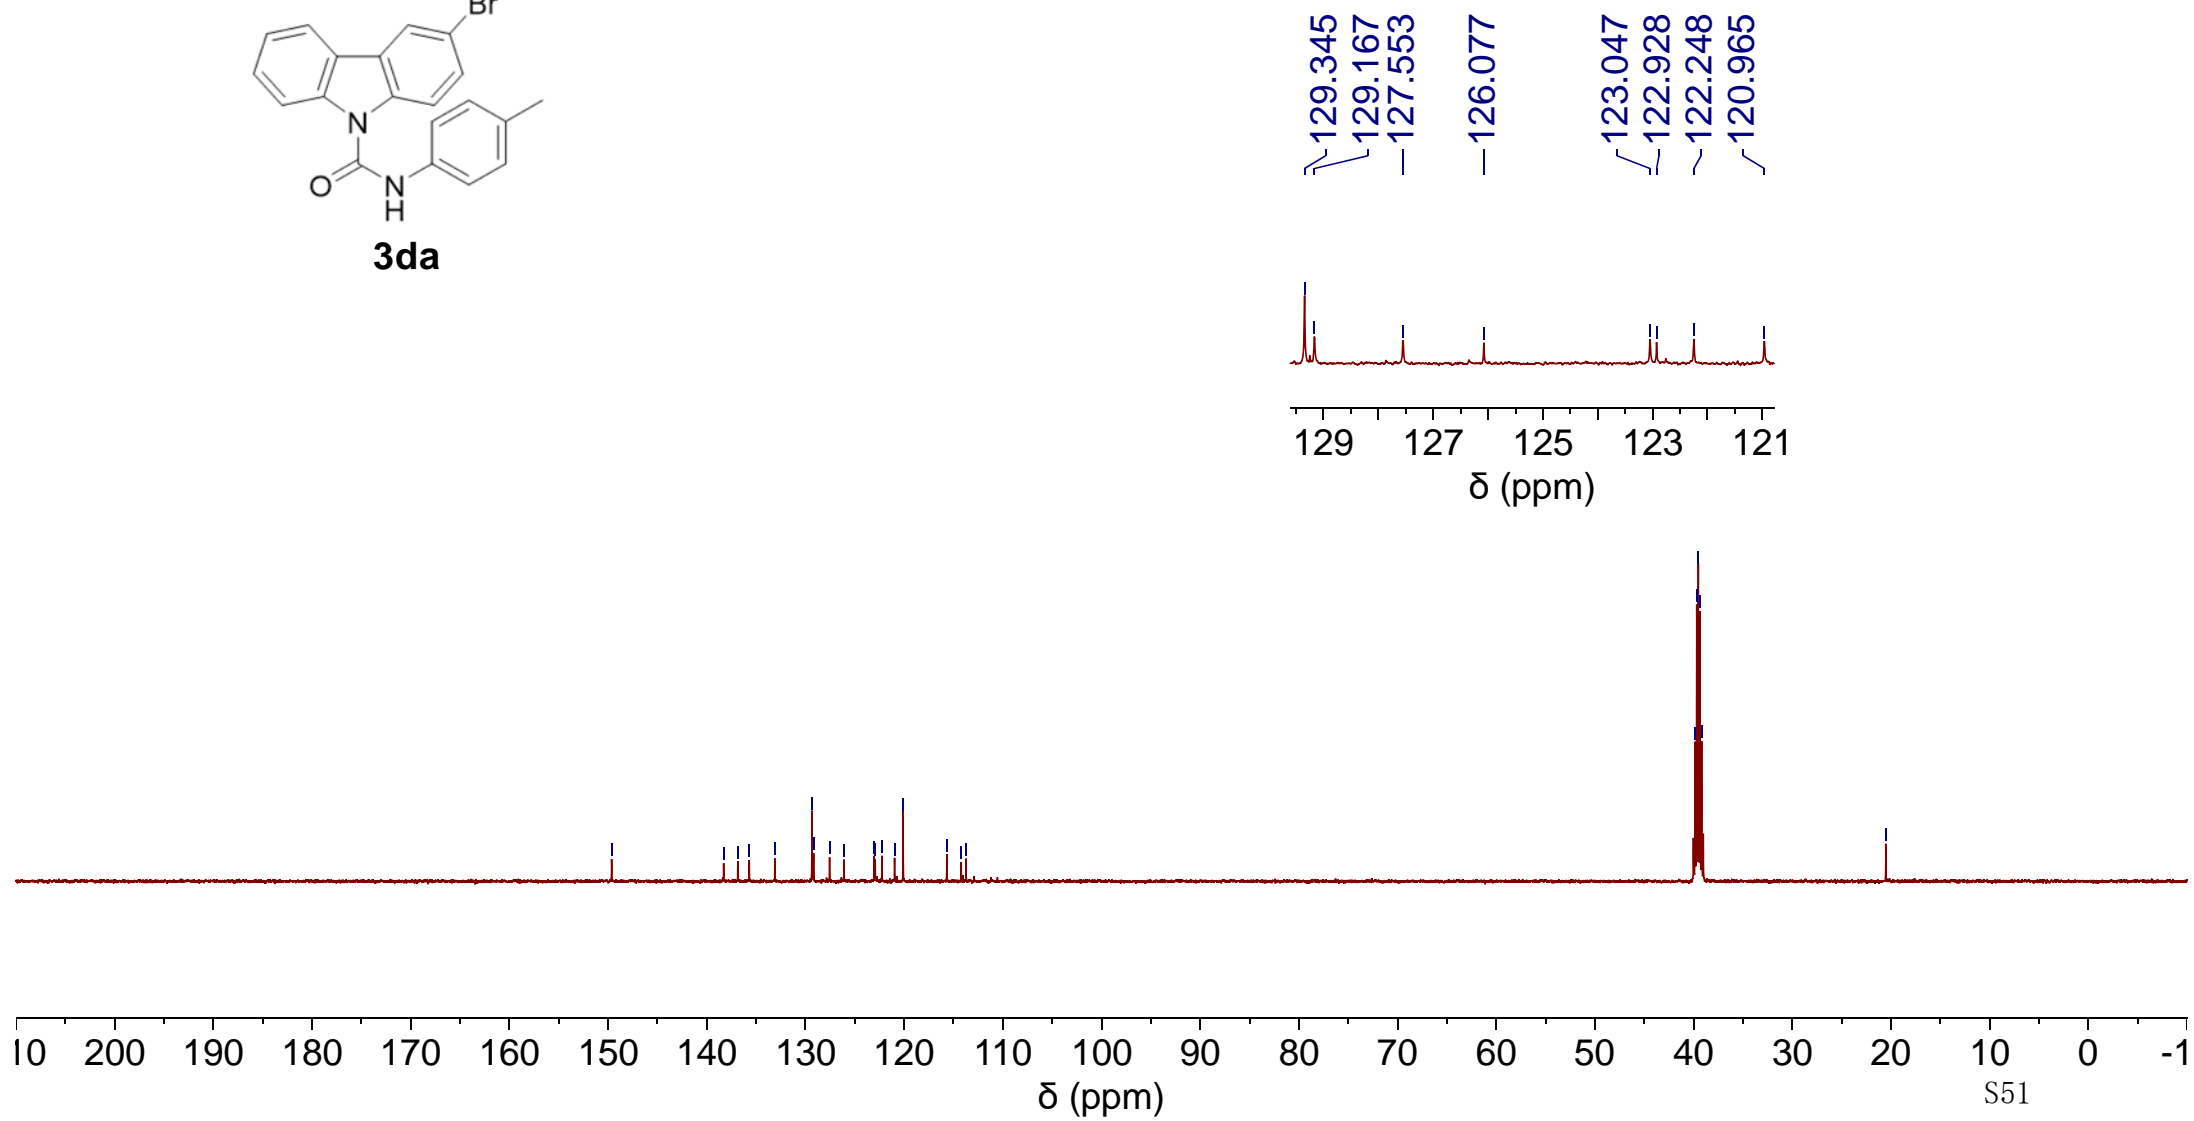

10.681

8.743  
8.727  
7.959  
7.943  
7.637  
7.620  
7.604  
7.587  
7.469  
7.453  
7.437  
7.243  
7.227

3.373  
2.507  
2.503  
2.500  
2.495  
2.318

<sup>1</sup>H NMR (500 MHz, DMSO-*d*<sub>6</sub>)

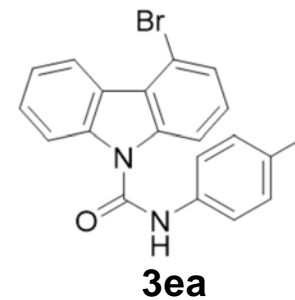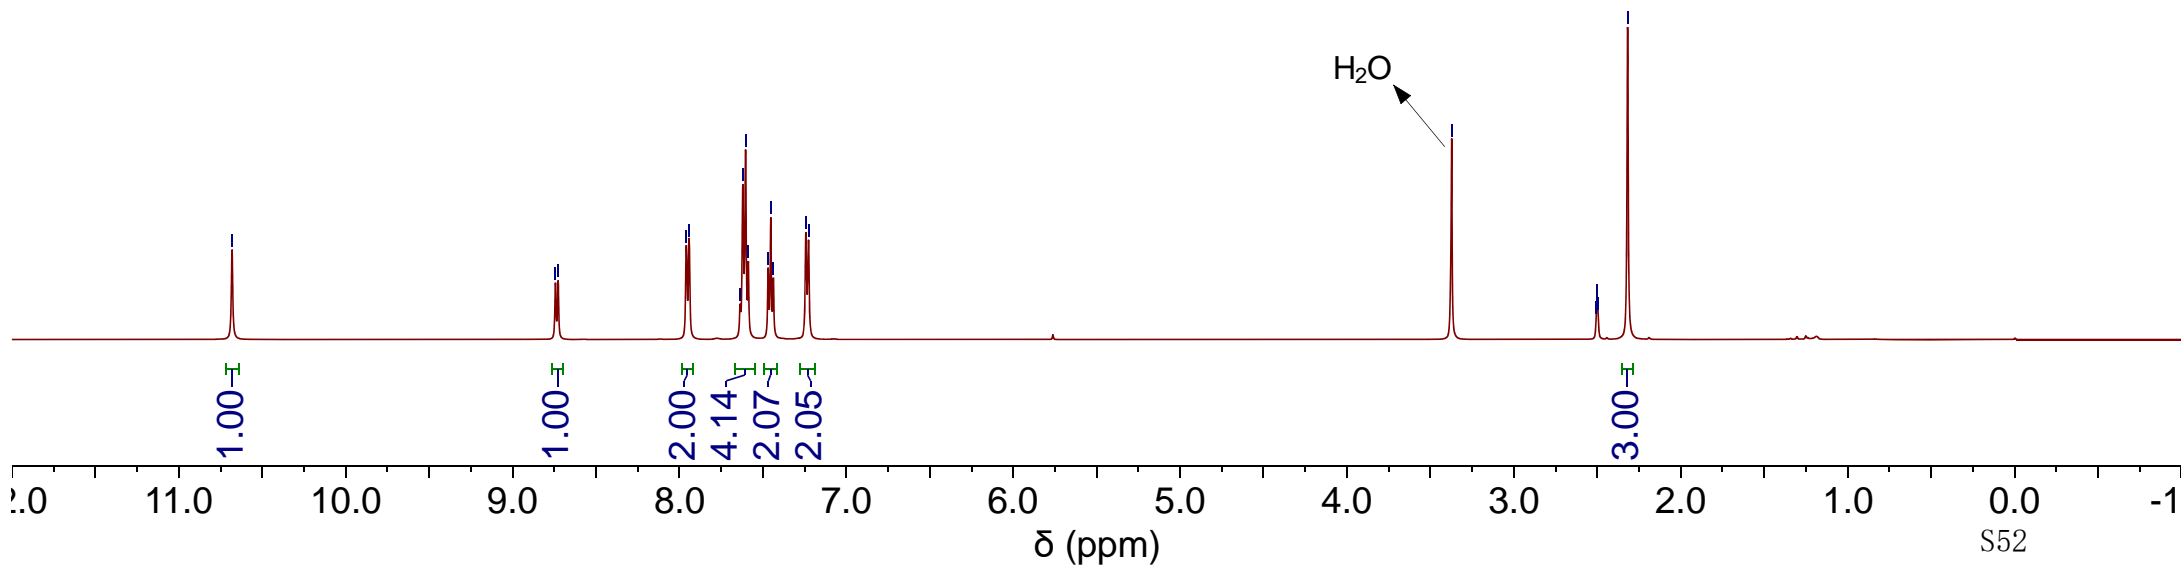

<sup>13</sup>C NMR (126 MHz, DMSO-*d*<sub>6</sub>)

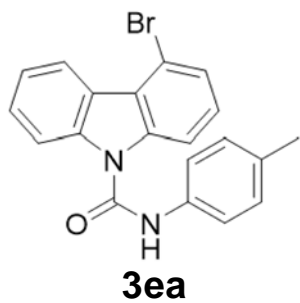

149.33  
139.42  
138.34  
135.59  
133.29  
129.39  
127.66  
127.52  
125.90  
122.98  
121.97  
121.90  
121.83  
120.11  
115.41  
113.34  
112.73

40.02  
39.85  
39.69  
39.52  
39.35  
39.19  
39.02  
20.54

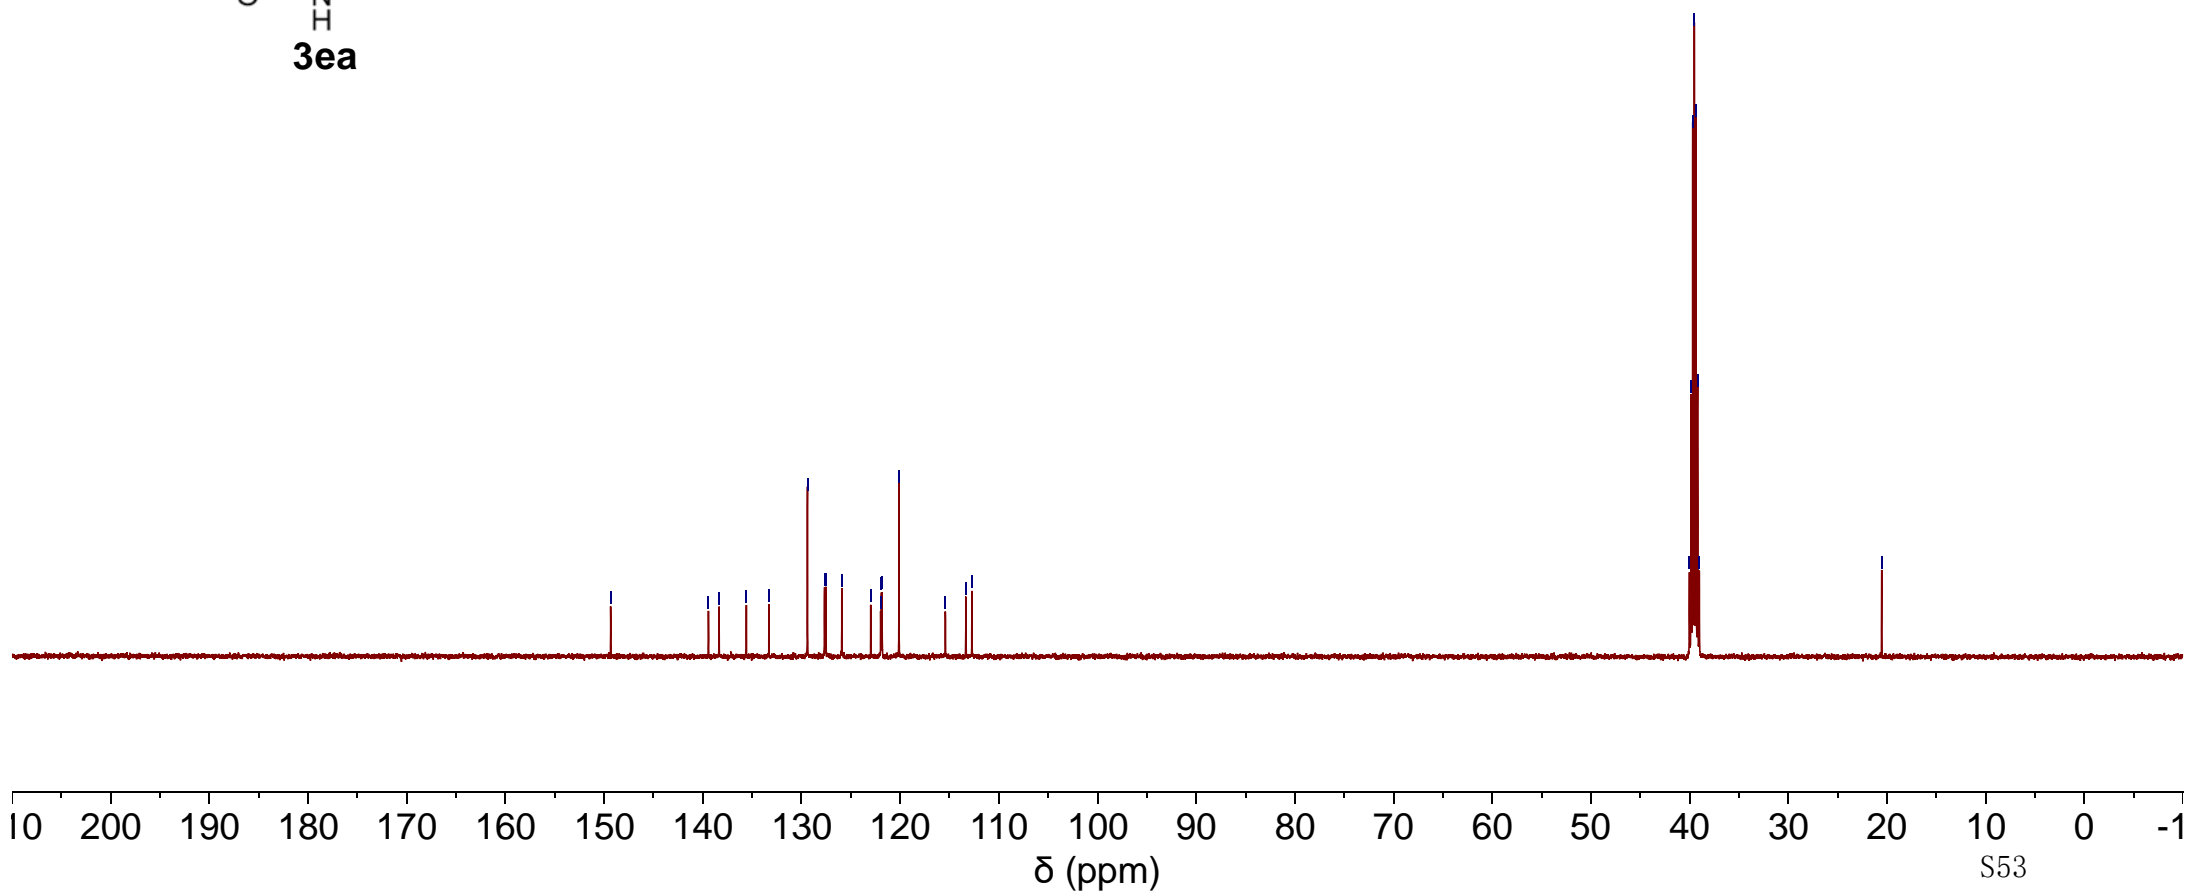

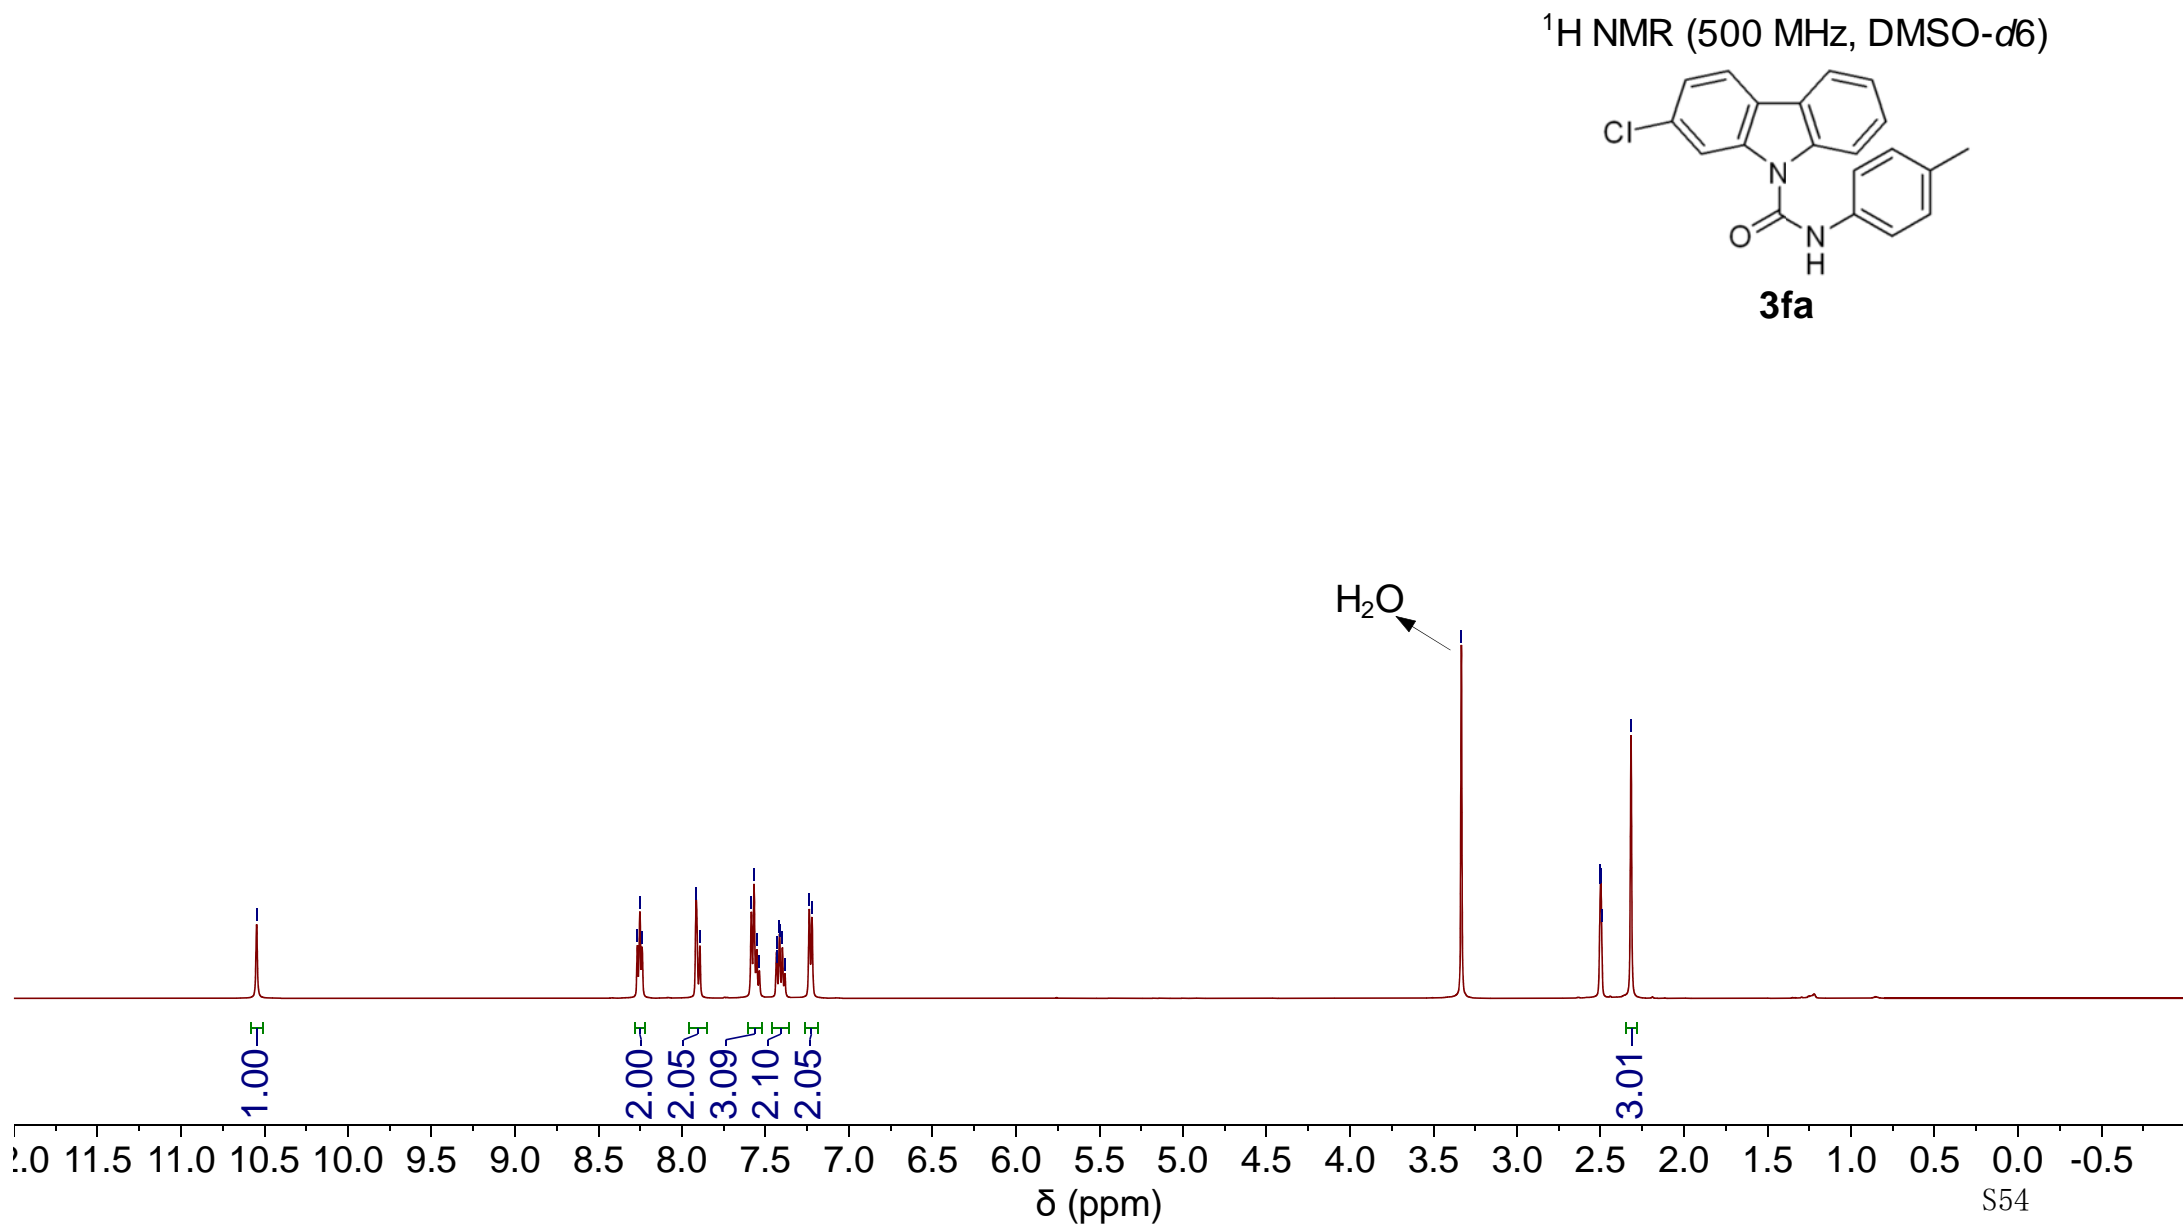

<sup>13</sup>C NMR (126 MHz, DMSO-*d*<sub>6</sub>)

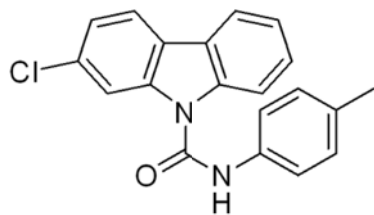

**3fa**

149.63  
138.52  
138.25  
135.61  
133.19  
131.01  
129.35  
127.17  
123.31  
122.93  
122.37  
122.16  
121.84  
120.62  
120.22  
113.77  
113.61

40.02  
39.85  
39.69  
39.52  
39.35  
39.19  
39.02  
20.52

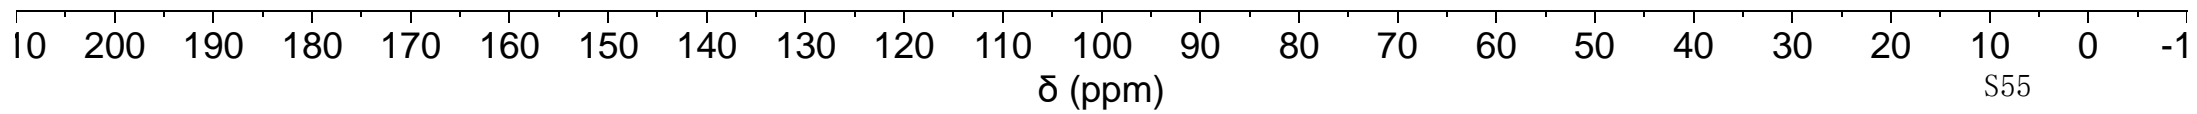



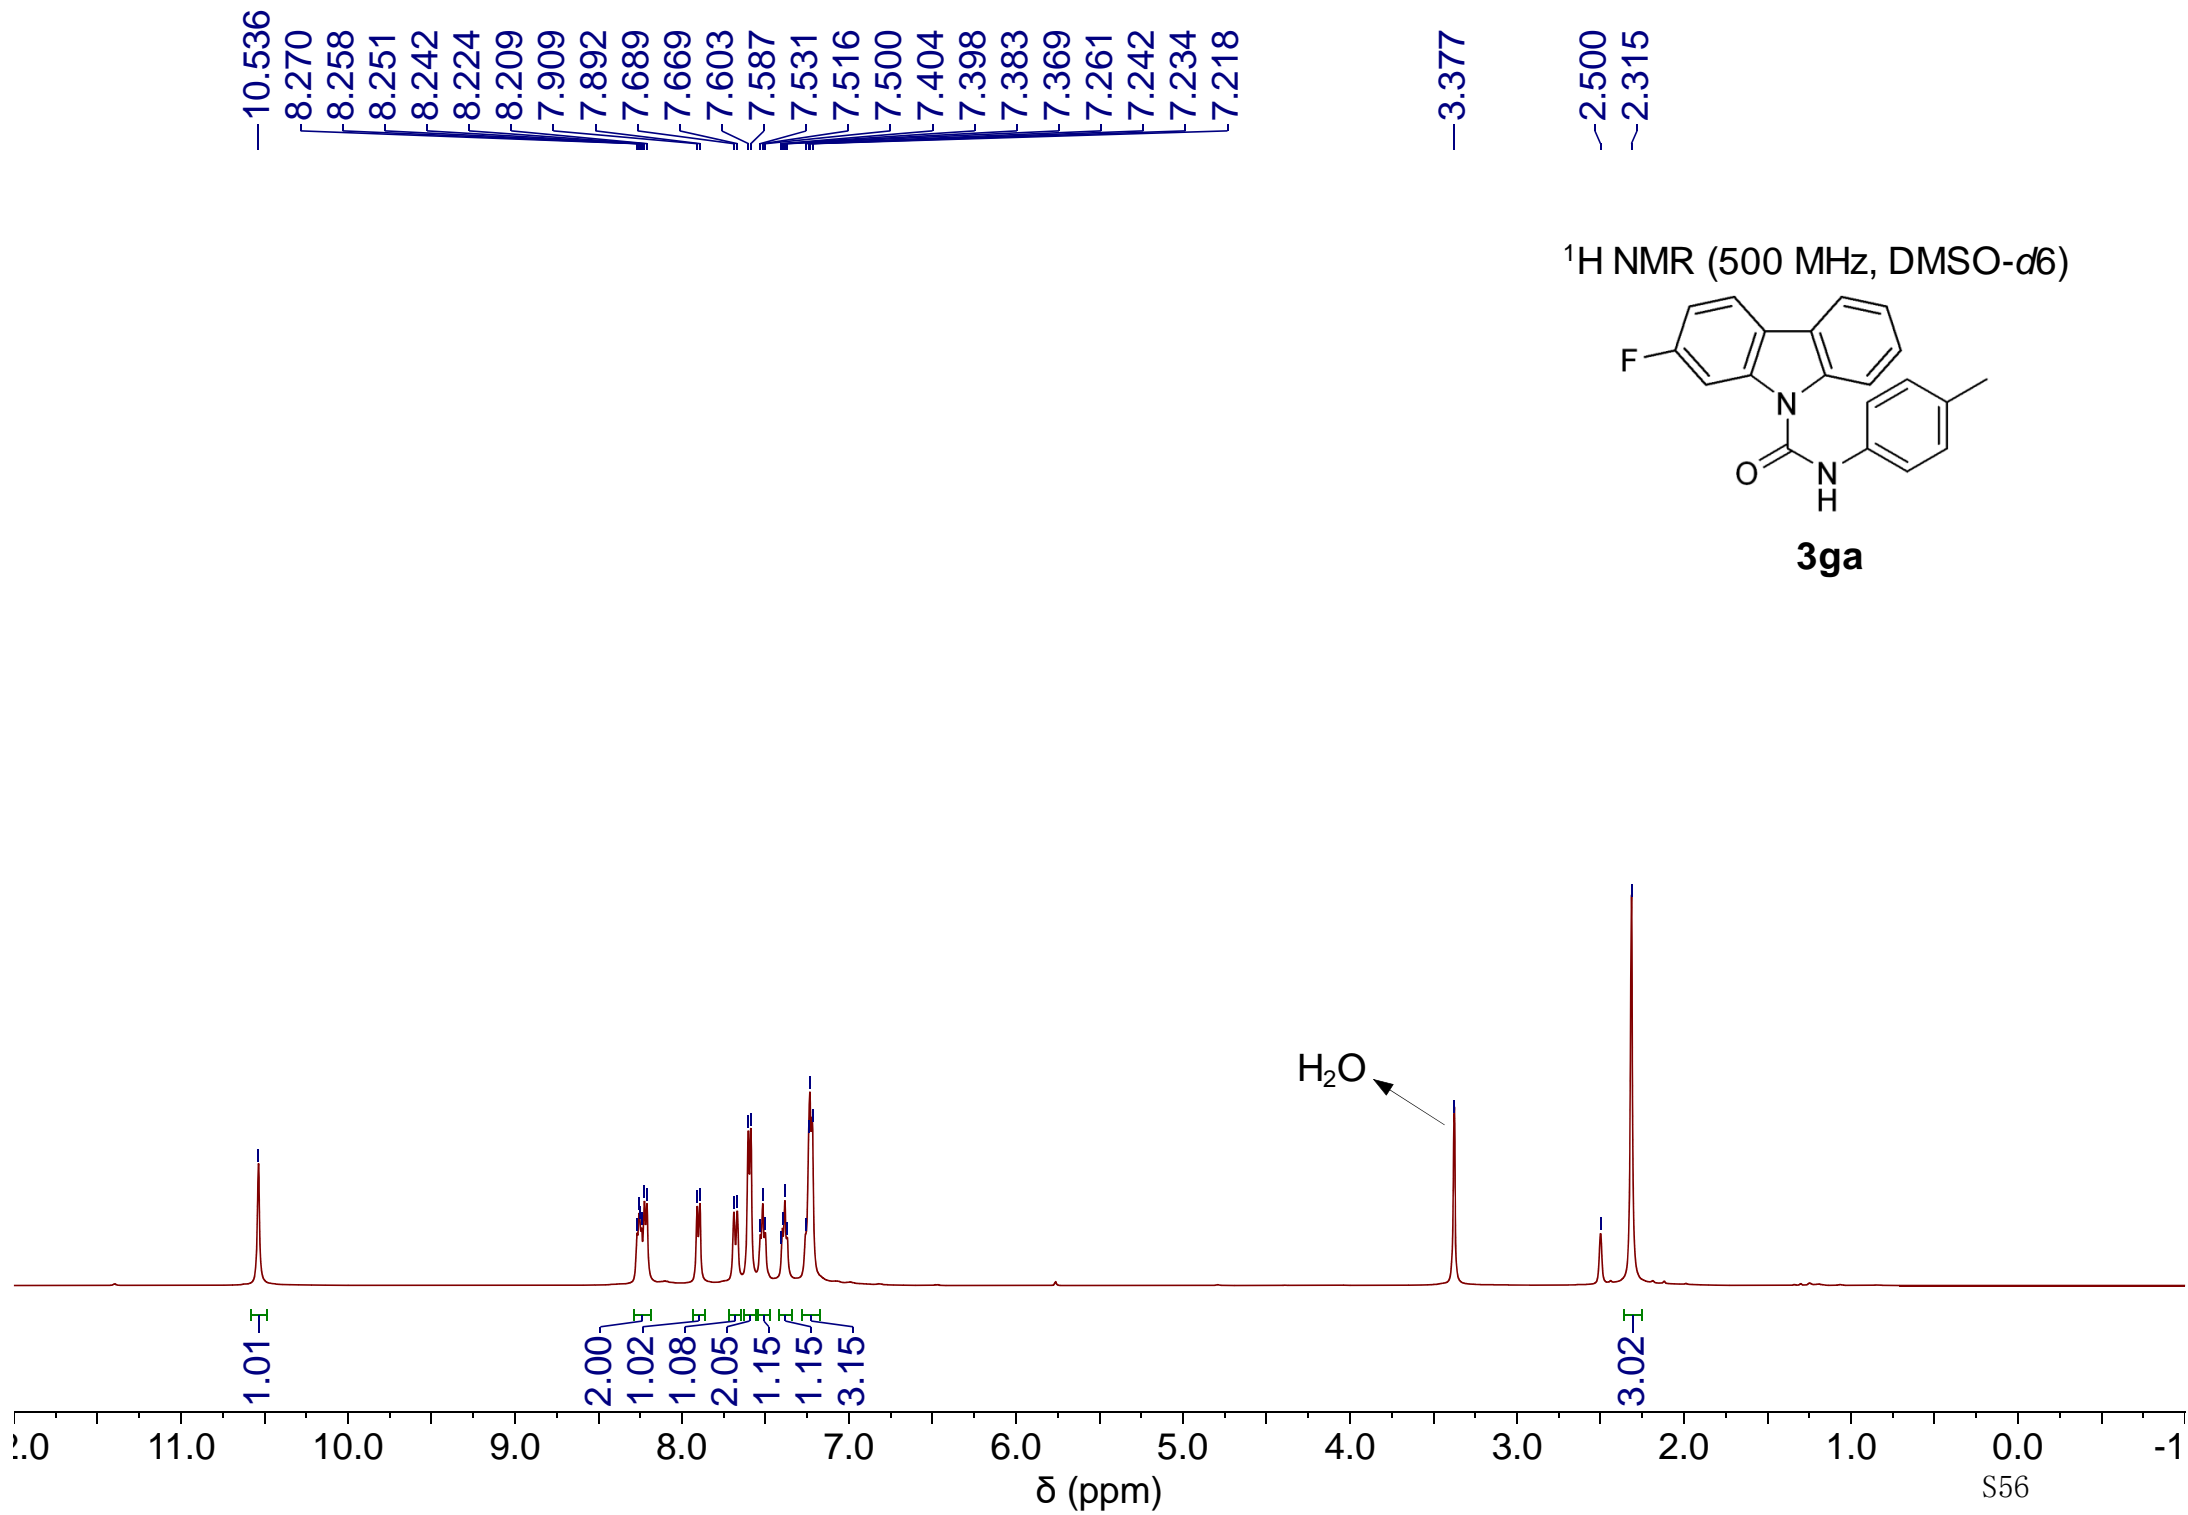

<sup>13</sup>C NMR (126 MHz, DMSO-*d*<sub>6</sub>)

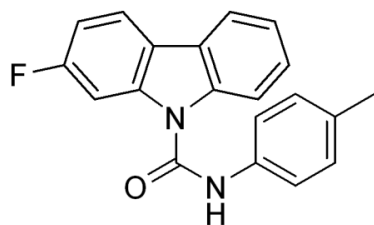

**3ga**

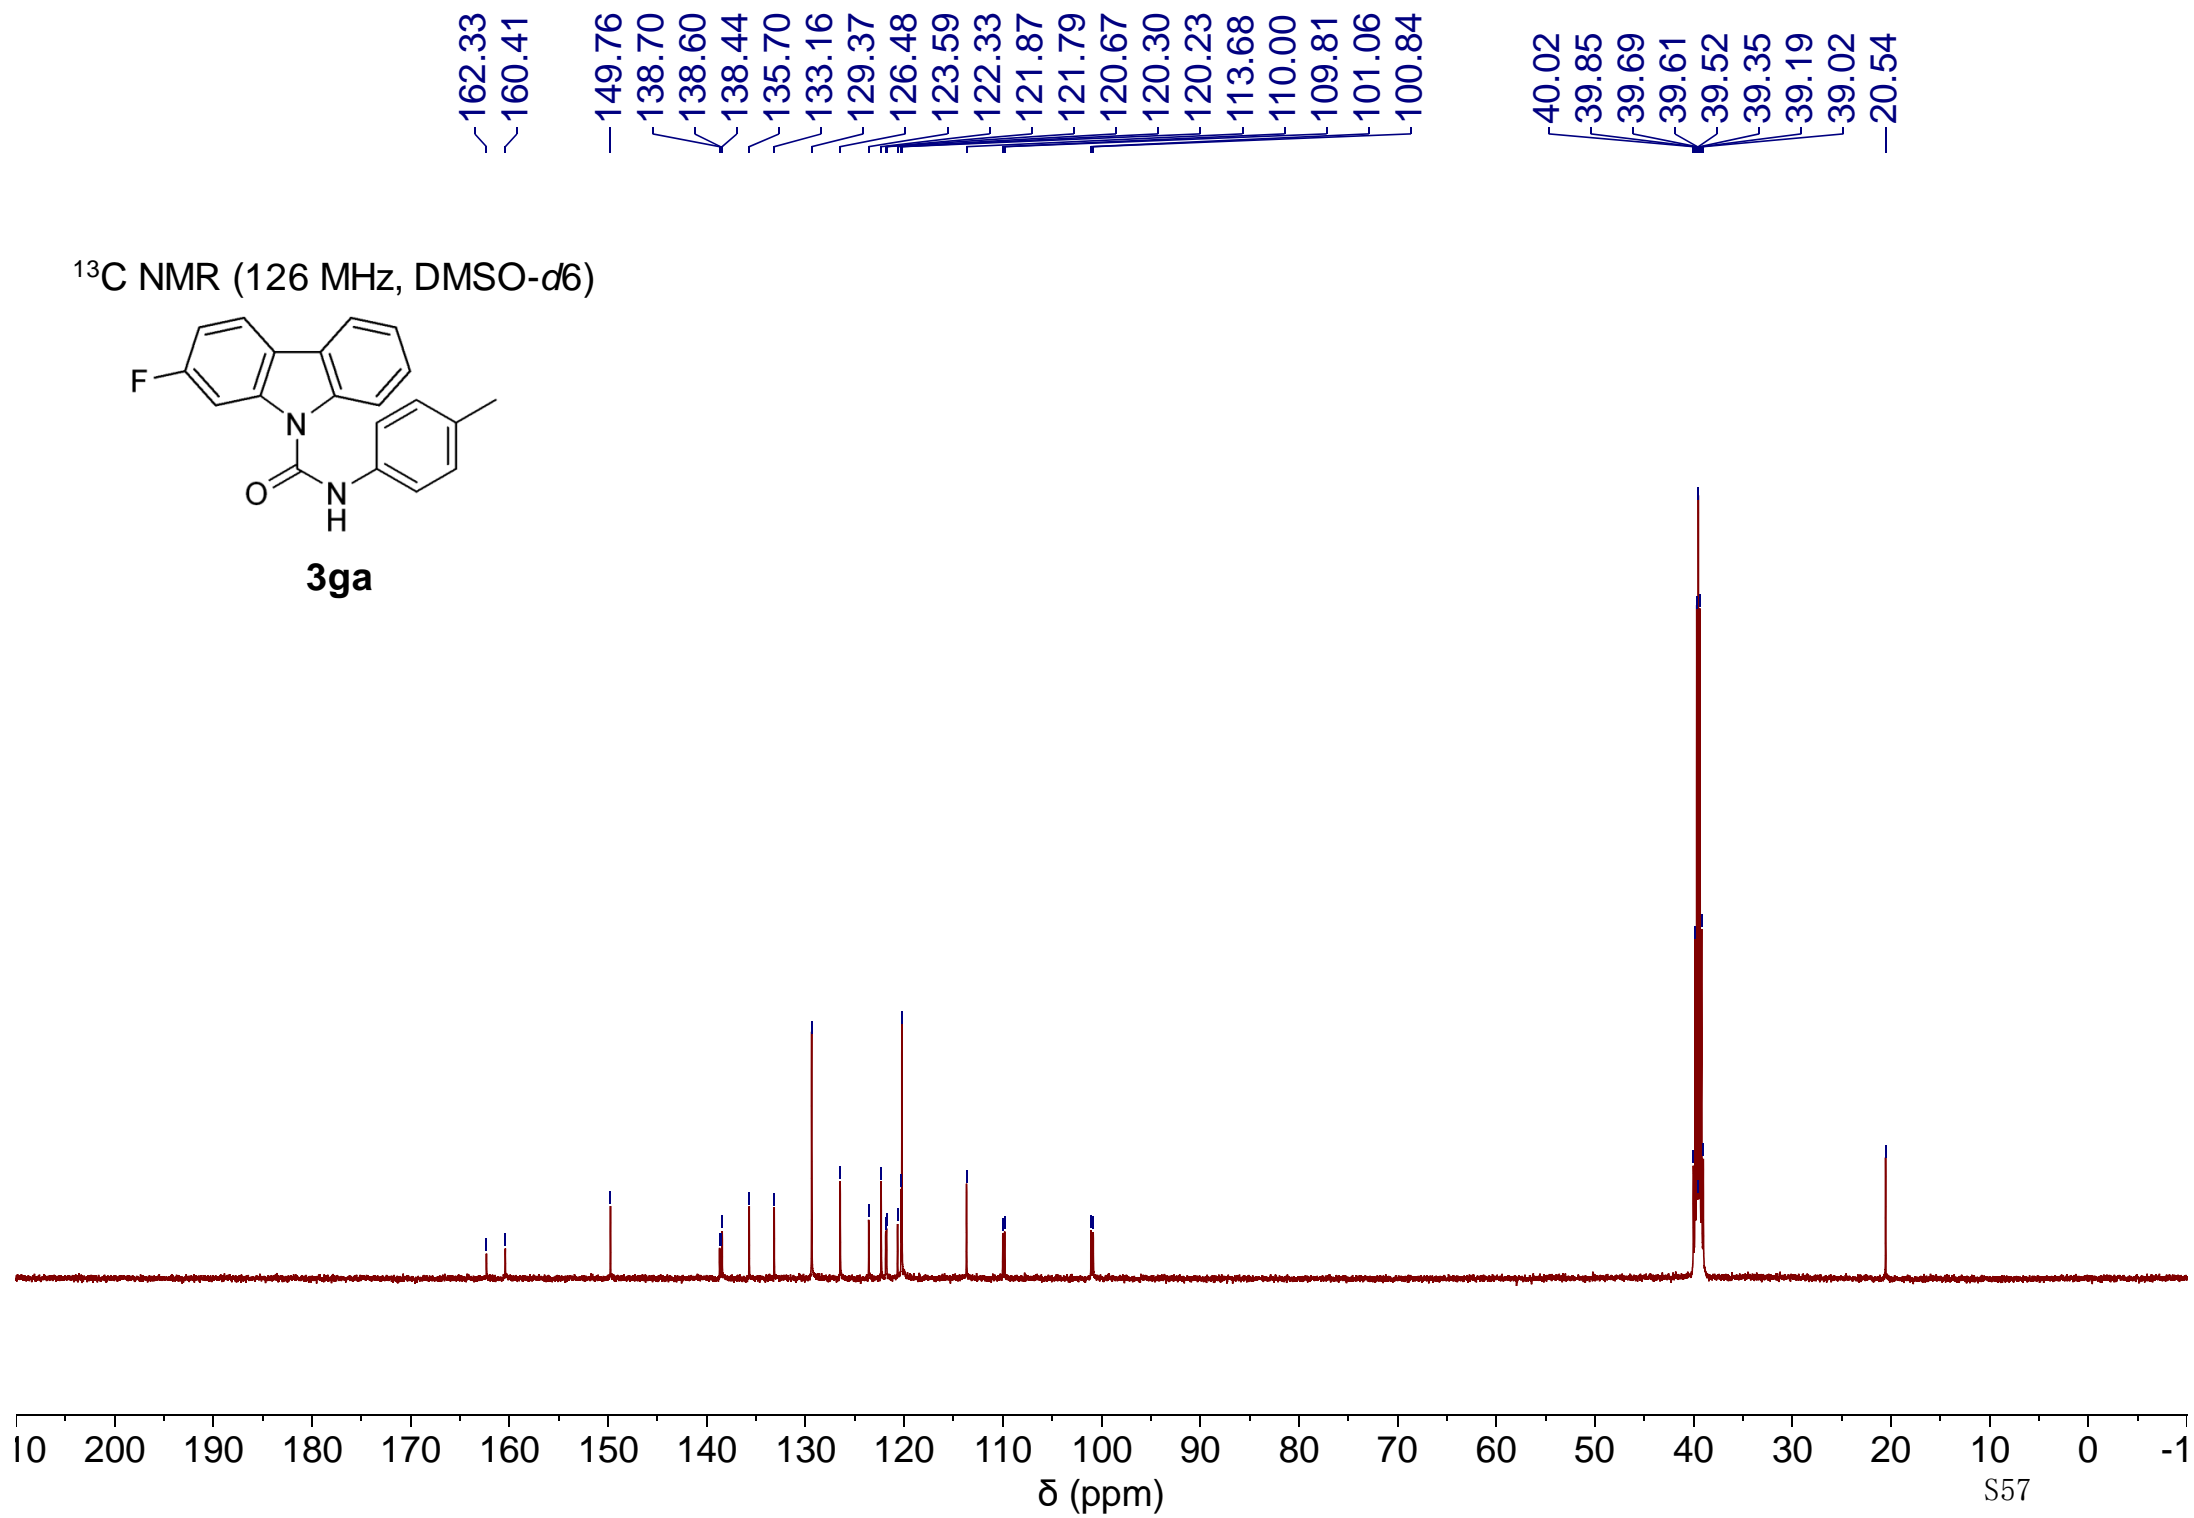

7.758  
7.742  
7.673  
7.656  
7.562  
7.475  
7.404  
7.388  
7.290  
7.275  
7.259  
7.216  
7.201  
7.186  
7.154  
7.138  
6.812  
6.795

-3.772

-2.319

<sup>1</sup>H NMR (500 MHz, CDCl<sub>3</sub>)

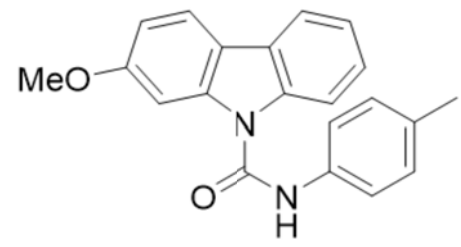

**3ha**

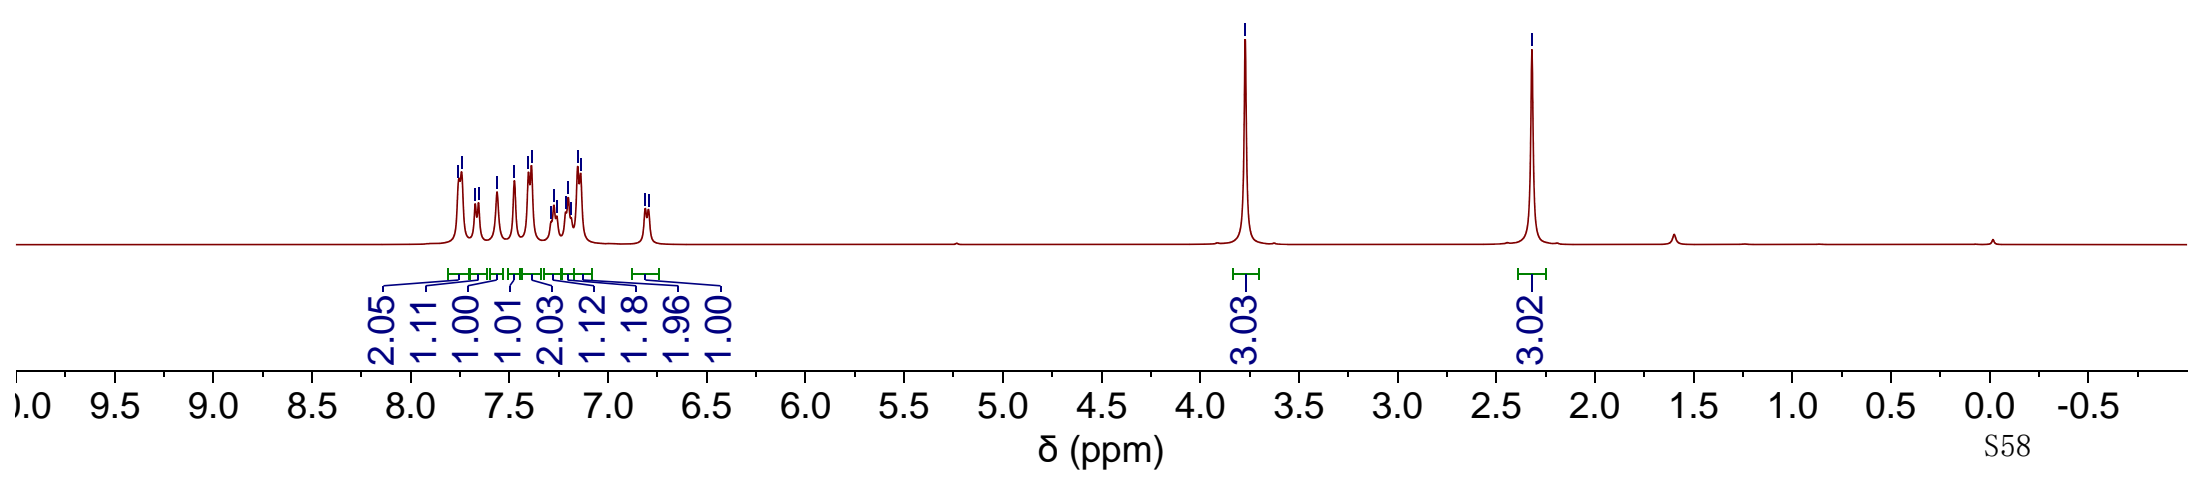

<sup>1</sup>H NMR (126 MHz, CDCl<sub>3</sub>)

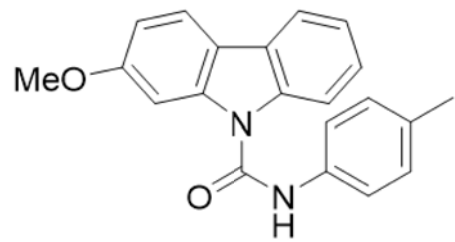

**3ha**

—159.61  
—150.42  
139.71  
137.80  
134.58  
134.52  
~129.88  
125.58  
125.51  
122.58  
120.64  
120.22  
119.57  
118.43  
112.93  
111.06  
98.21  
77.42  
77.16  
76.91  
—55.68  
—20.99

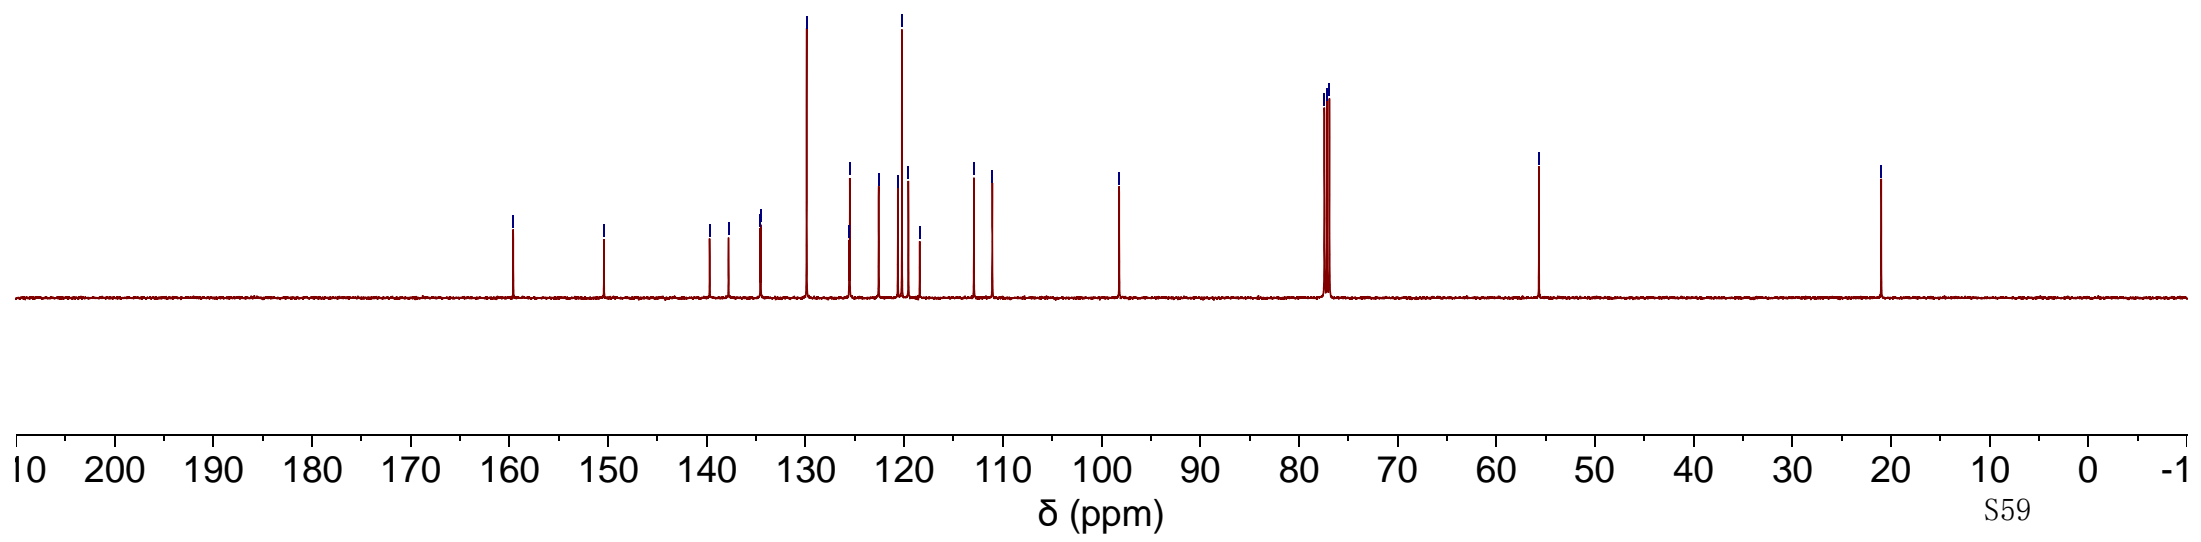

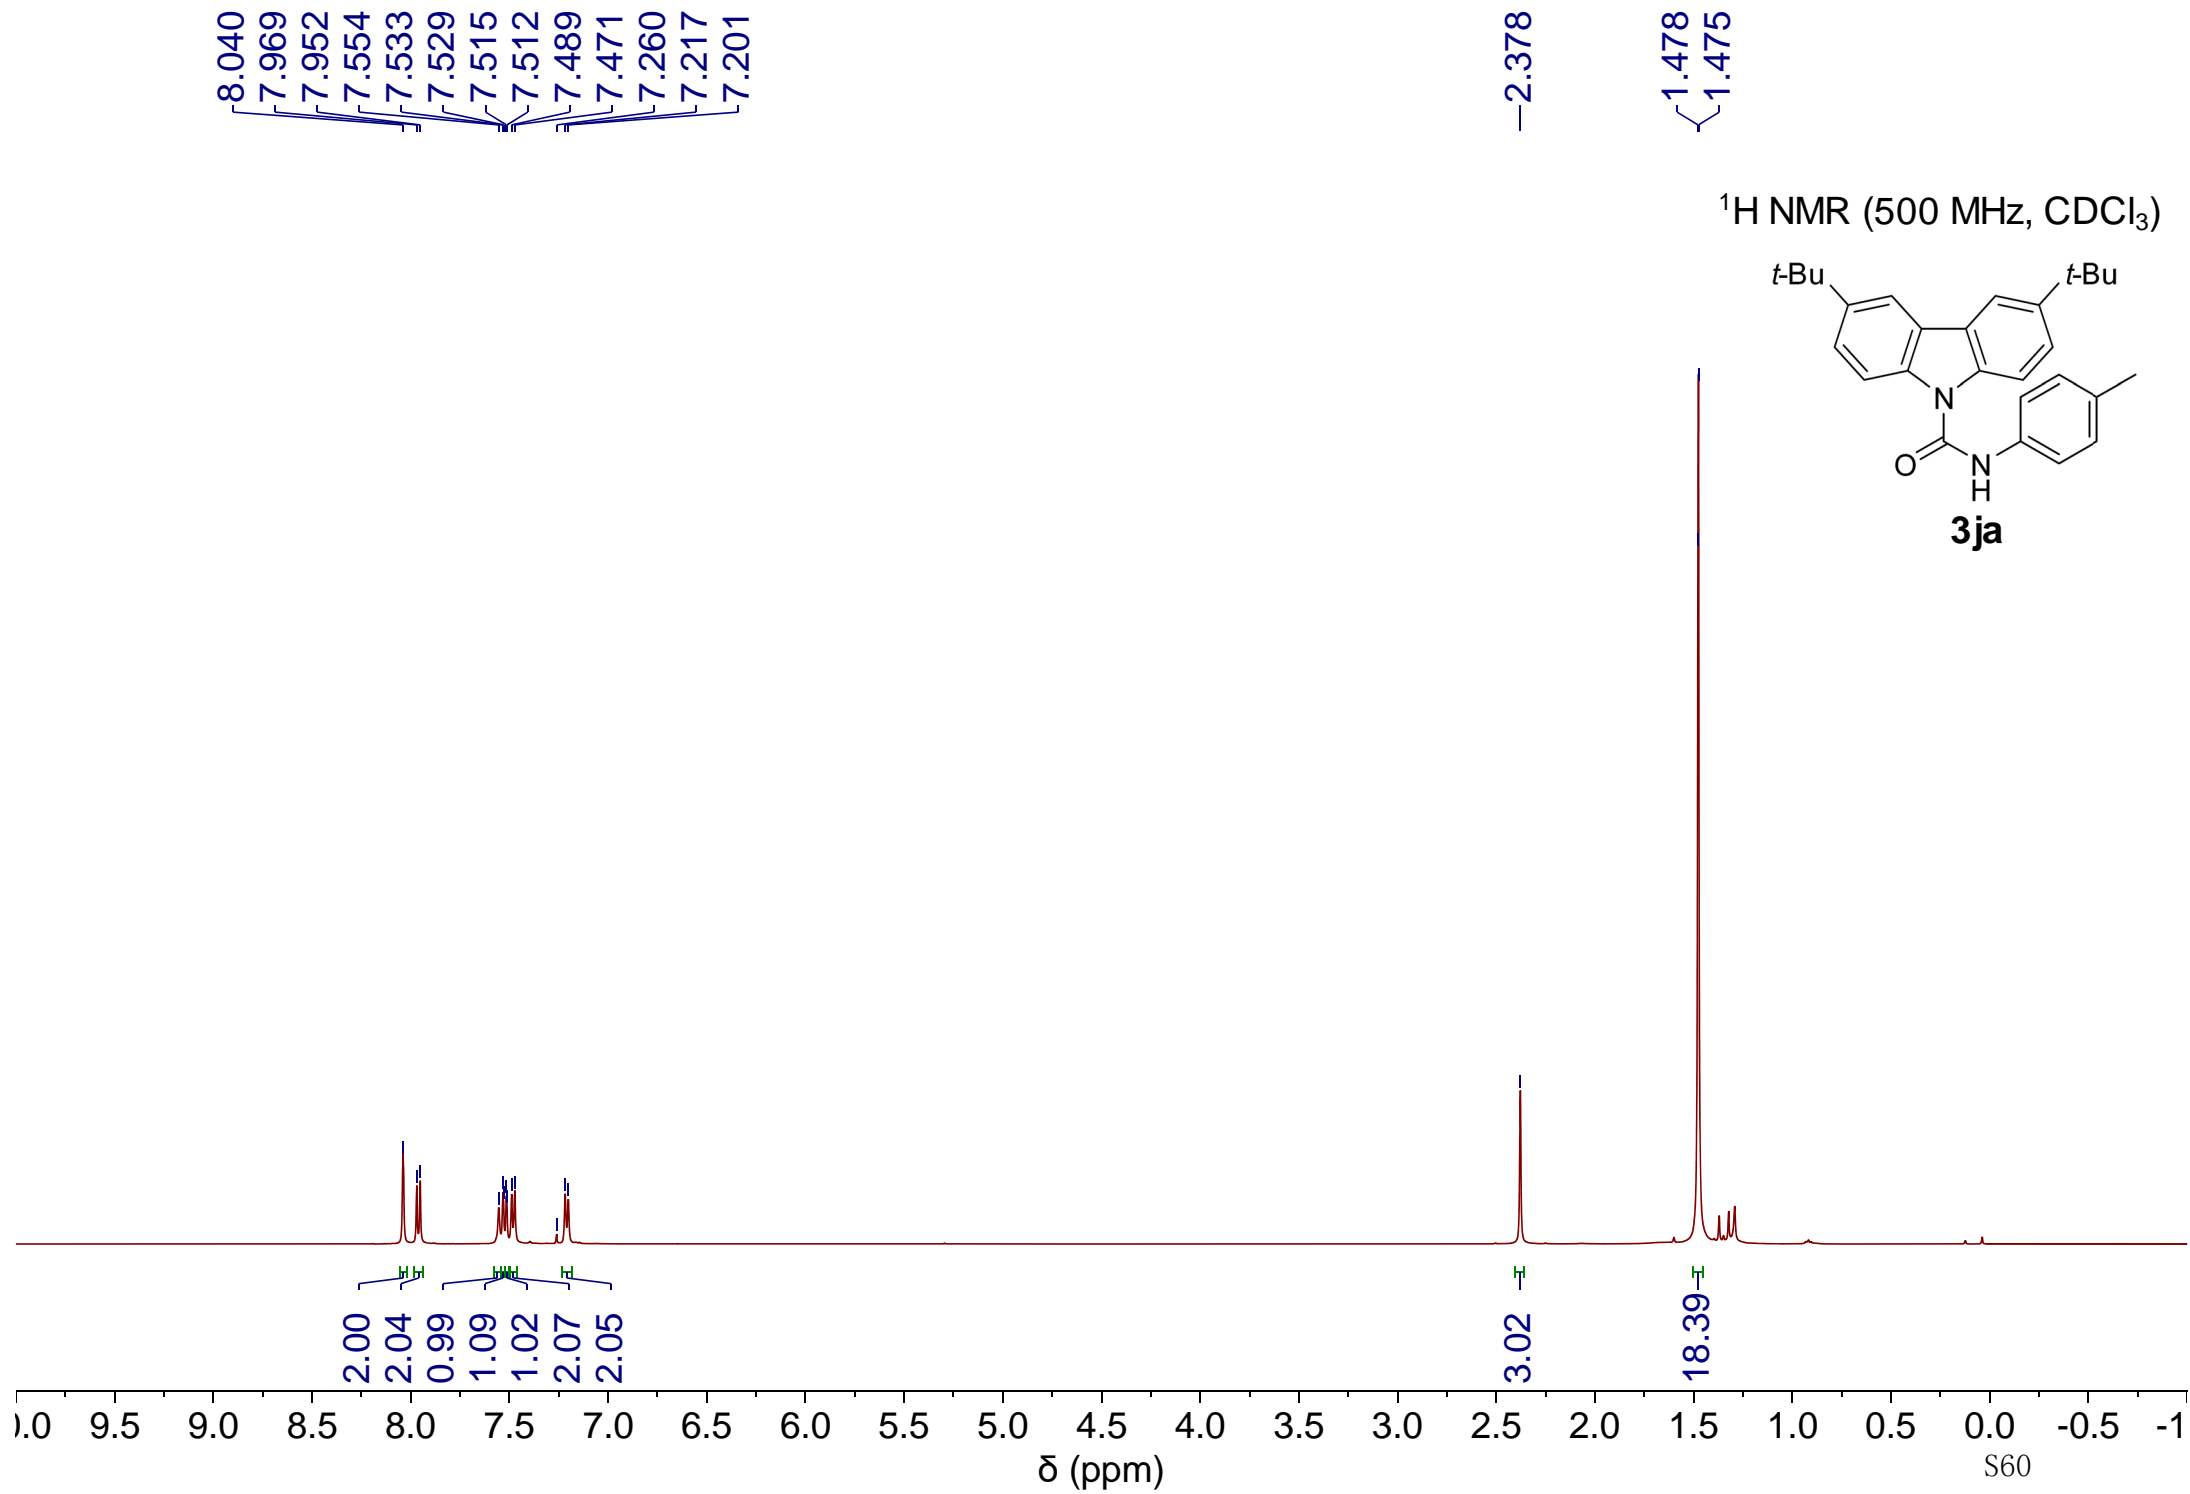

<sup>13</sup>C NMR (126 MHz, CDCl<sub>3</sub>)

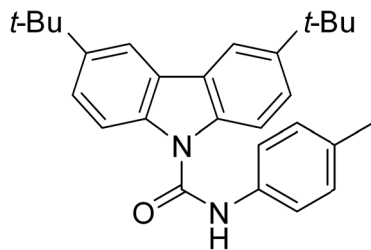

**3ja**

—150.51  
—145.73  
—136.66  
—134.84  
—134.29  
—129.88  
—125.49  
—124.78  
—120.12  
—116.42  
—113.29

—77.41  
—77.16  
—76.91

—34.87  
—31.91

—20.99

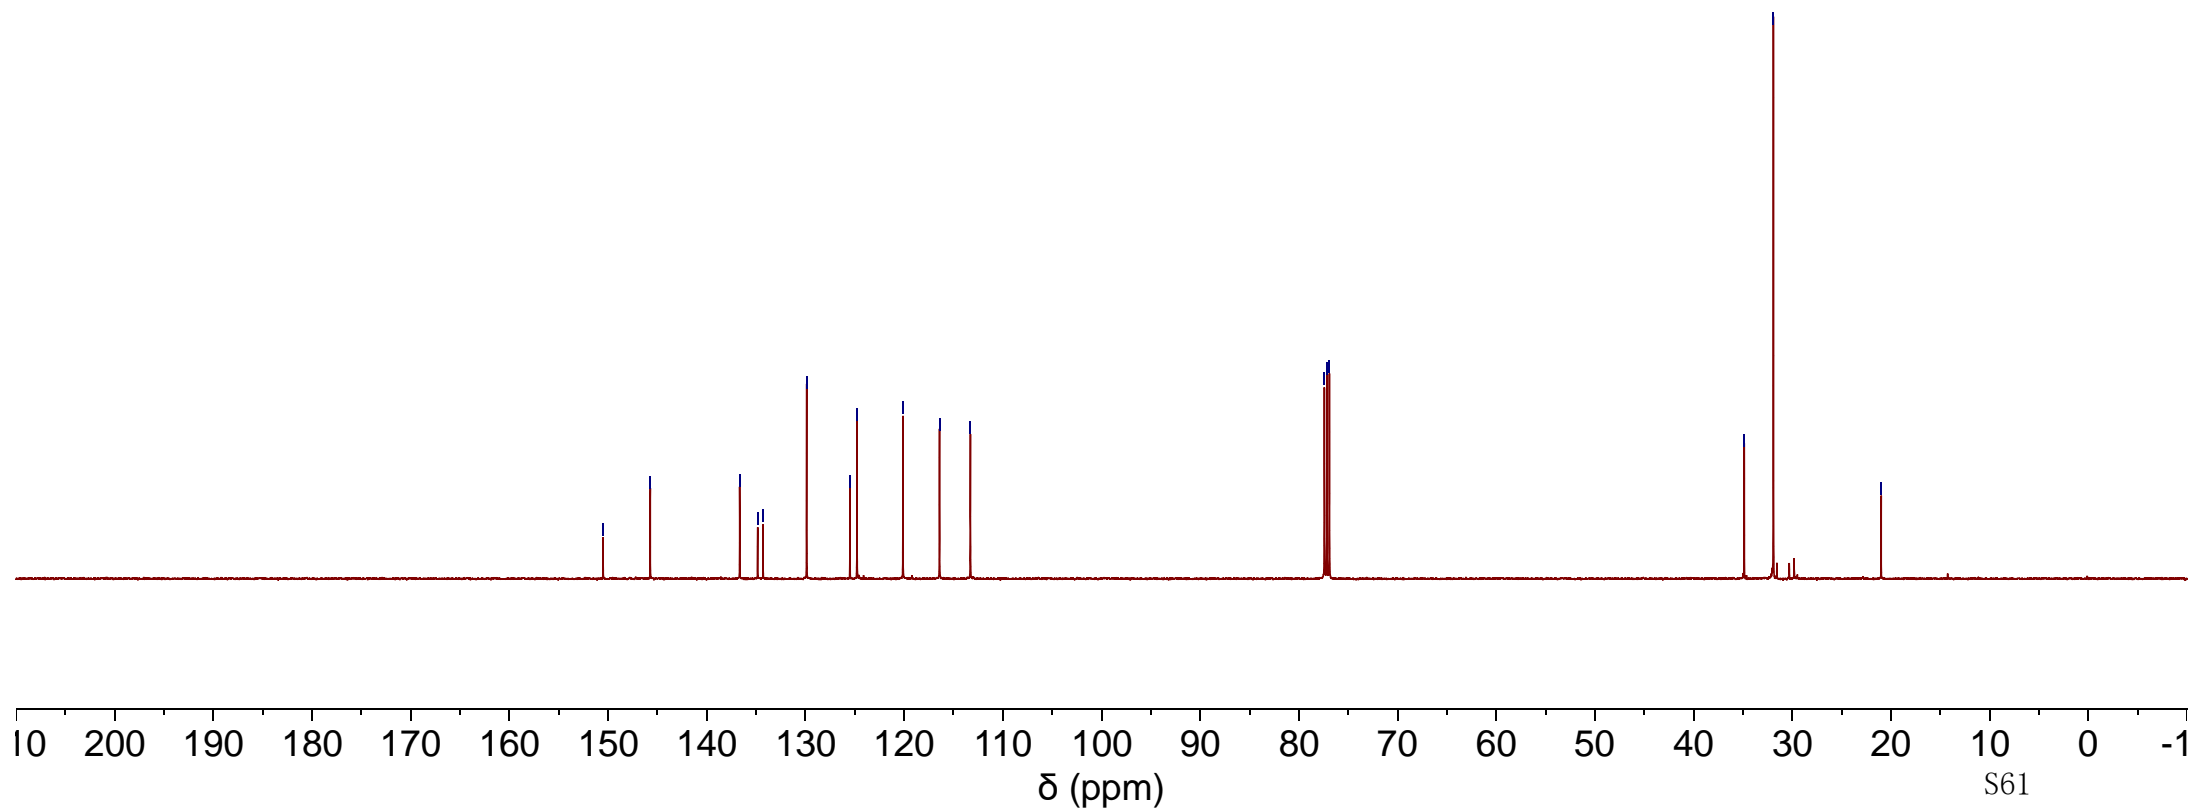

8.290  
8.048  
8.032  
8.015  
7.990  
7.974  
7.692  
7.677  
7.601  
7.585  
7.555  
7.492  
7.476  
7.467  
7.463  
7.453  
7.438  
7.382  
7.374  
7.367  
7.359  
7.345  
7.260  
7.233  
7.218

-2.376

-1.574

<sup>1</sup>H NMR (500 MHz, CDCl<sub>3</sub>)

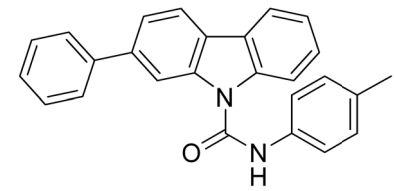

**3ka**

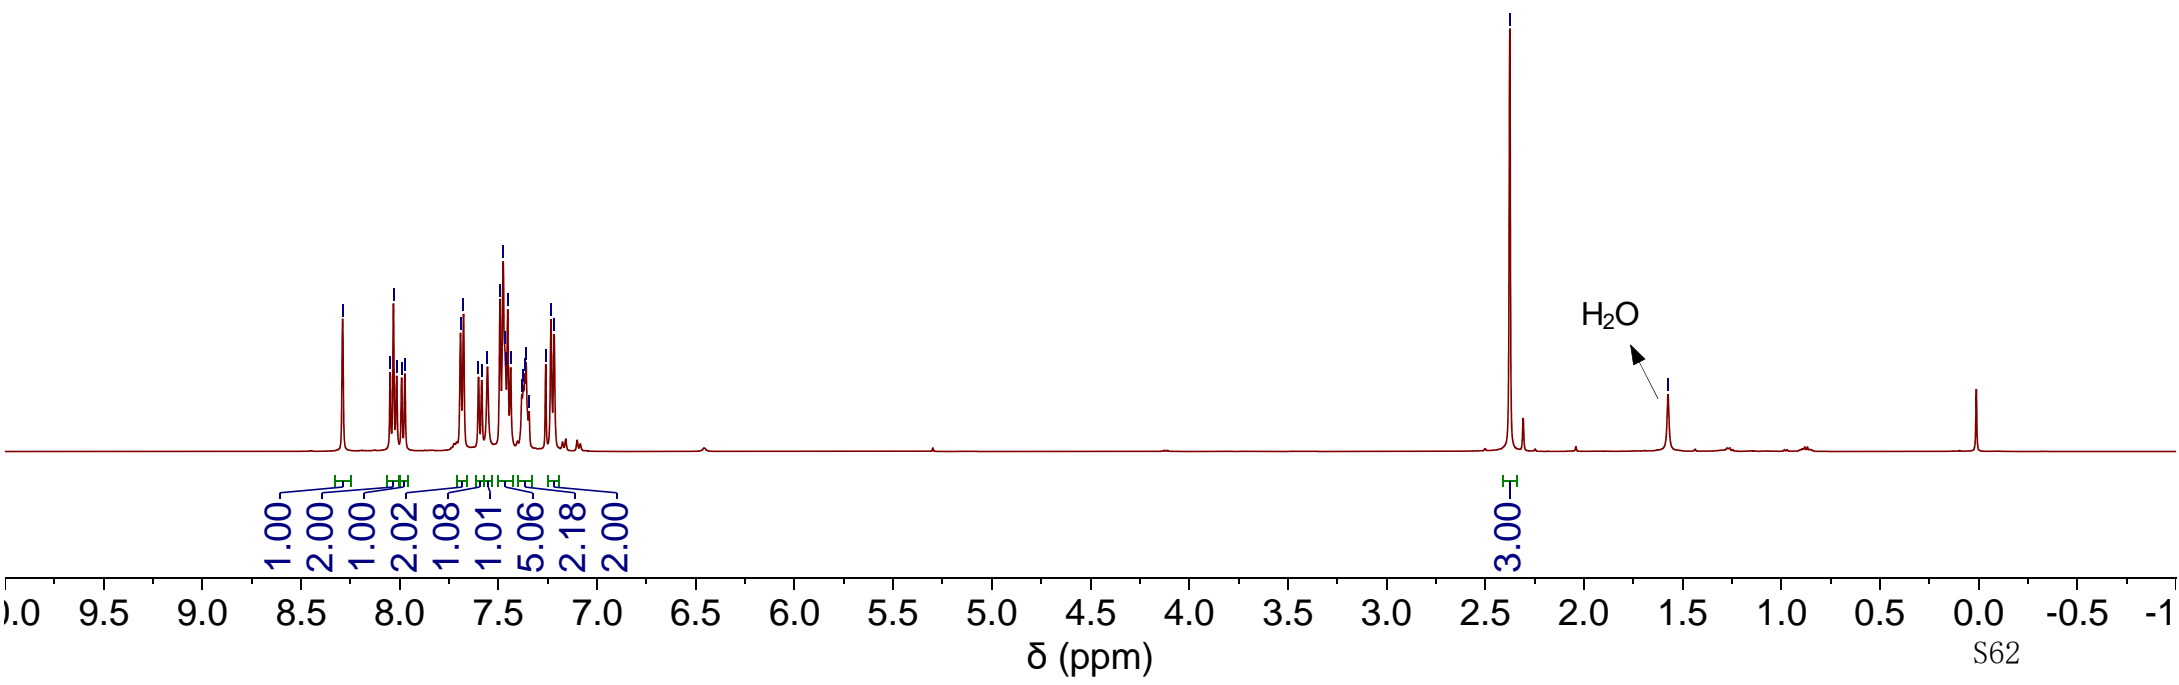

<sup>13</sup>C NMR (126 MHz, CDCl<sub>3</sub>)

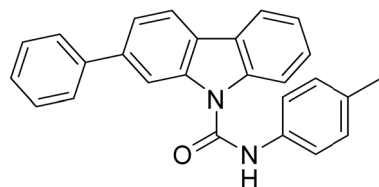

**3ka**

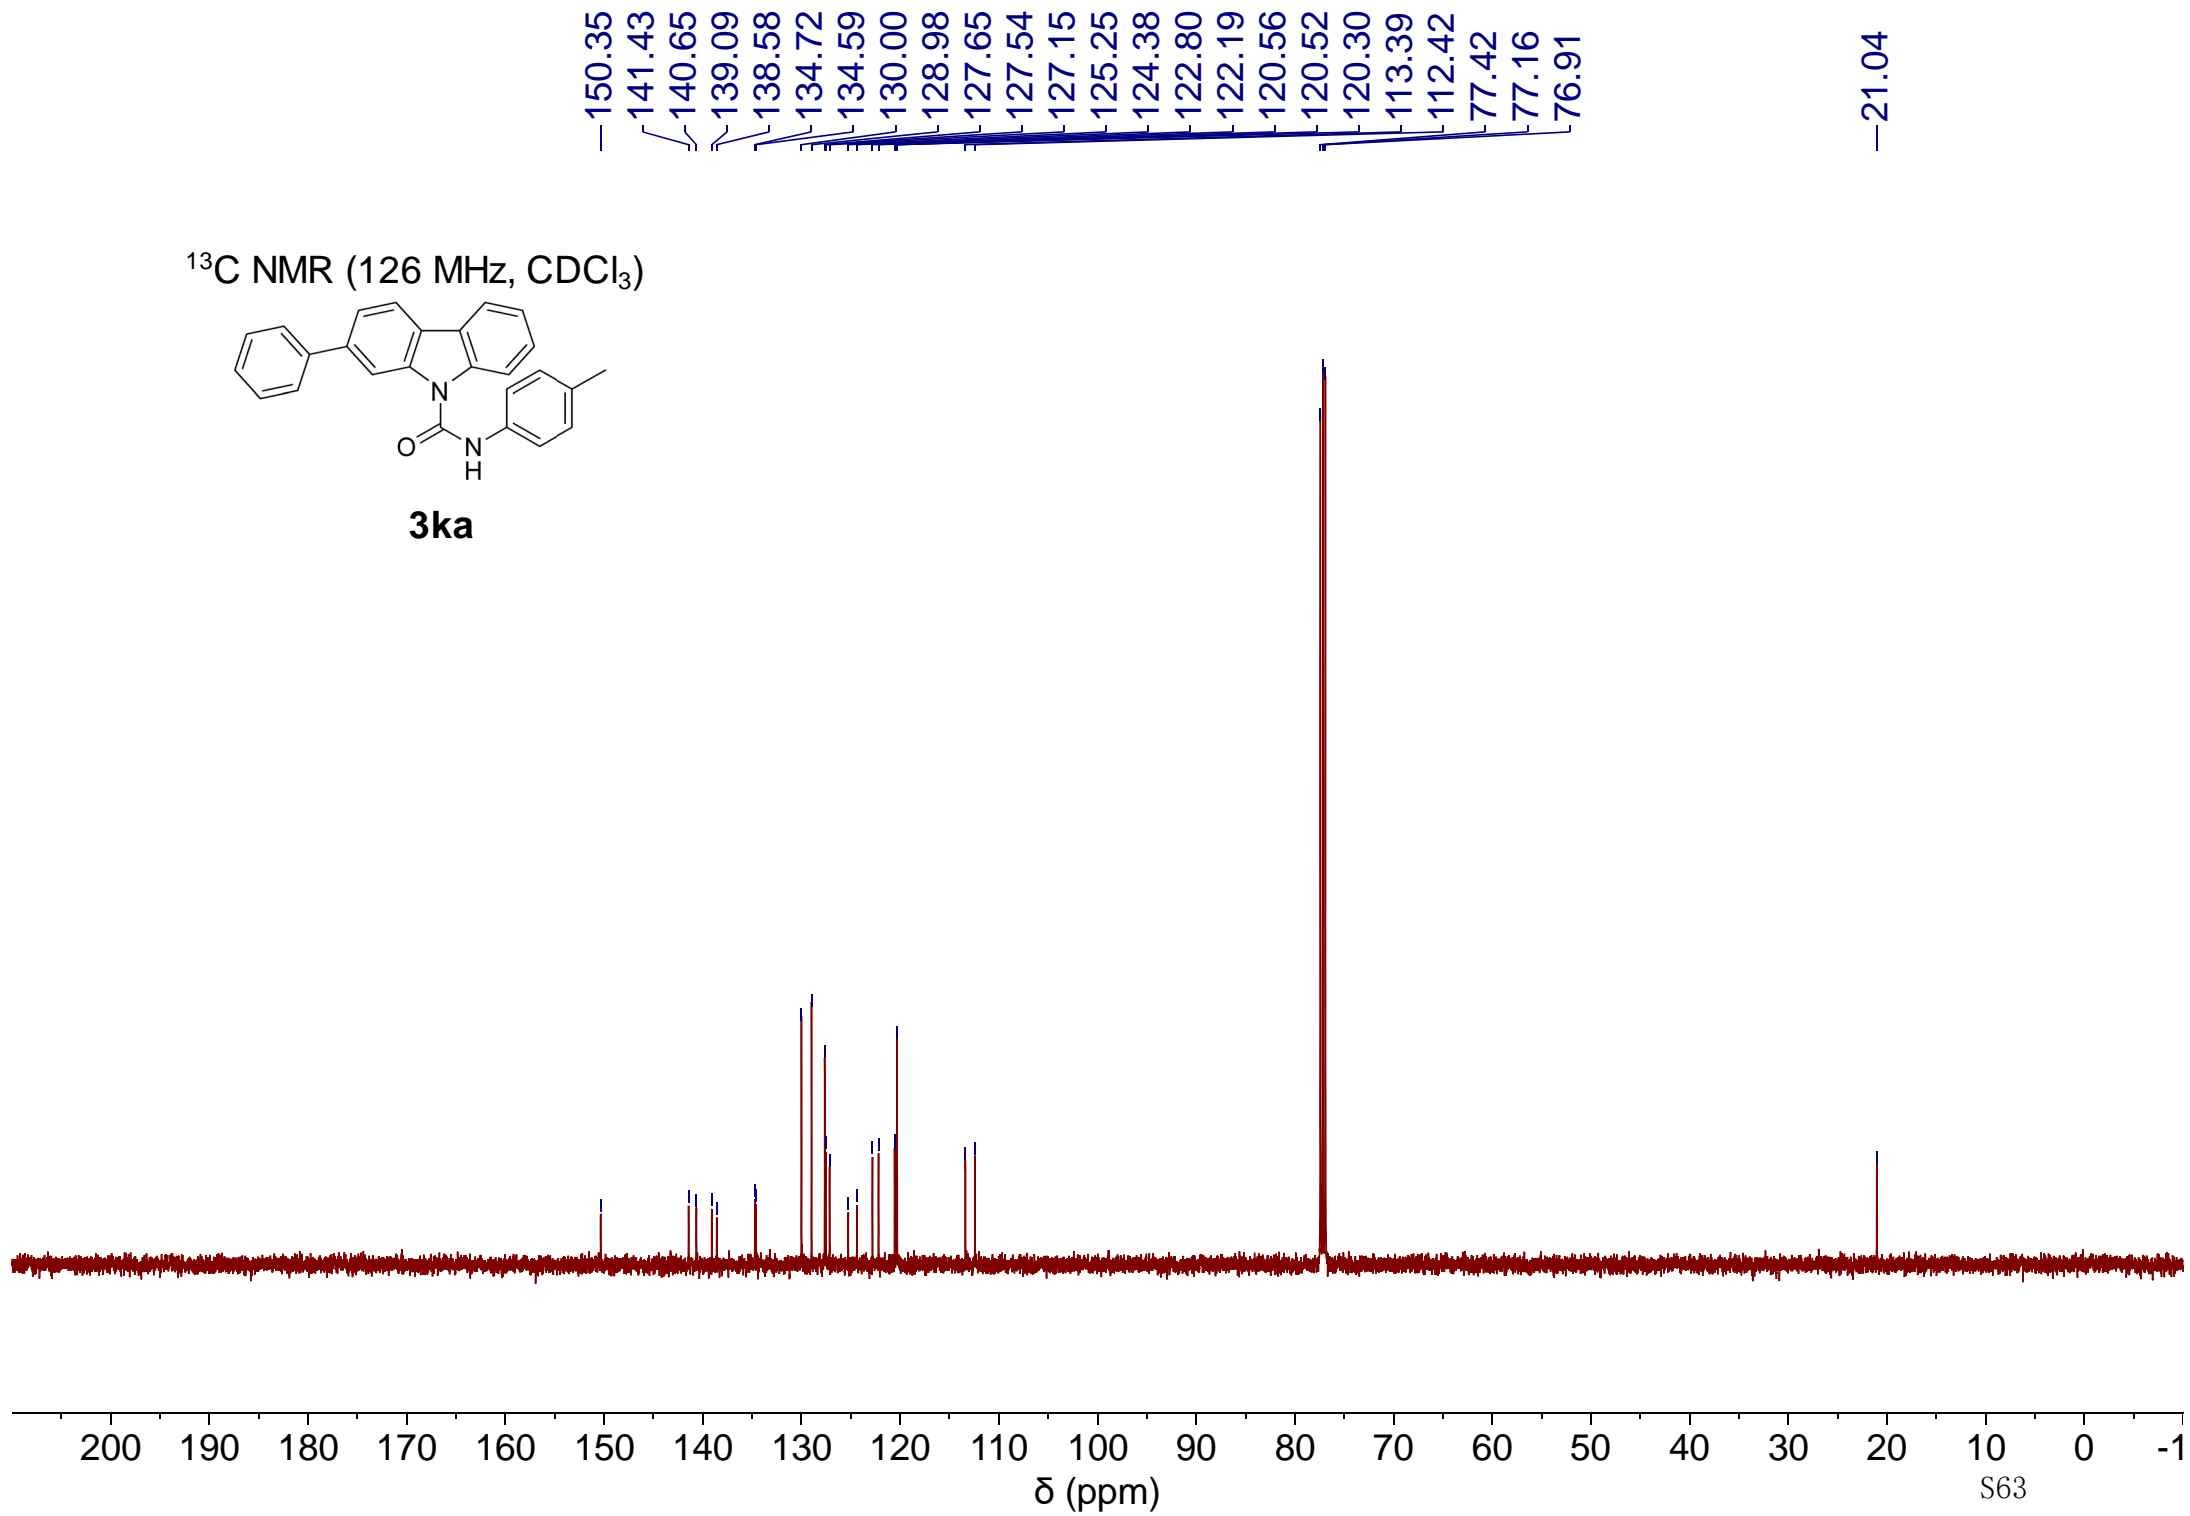



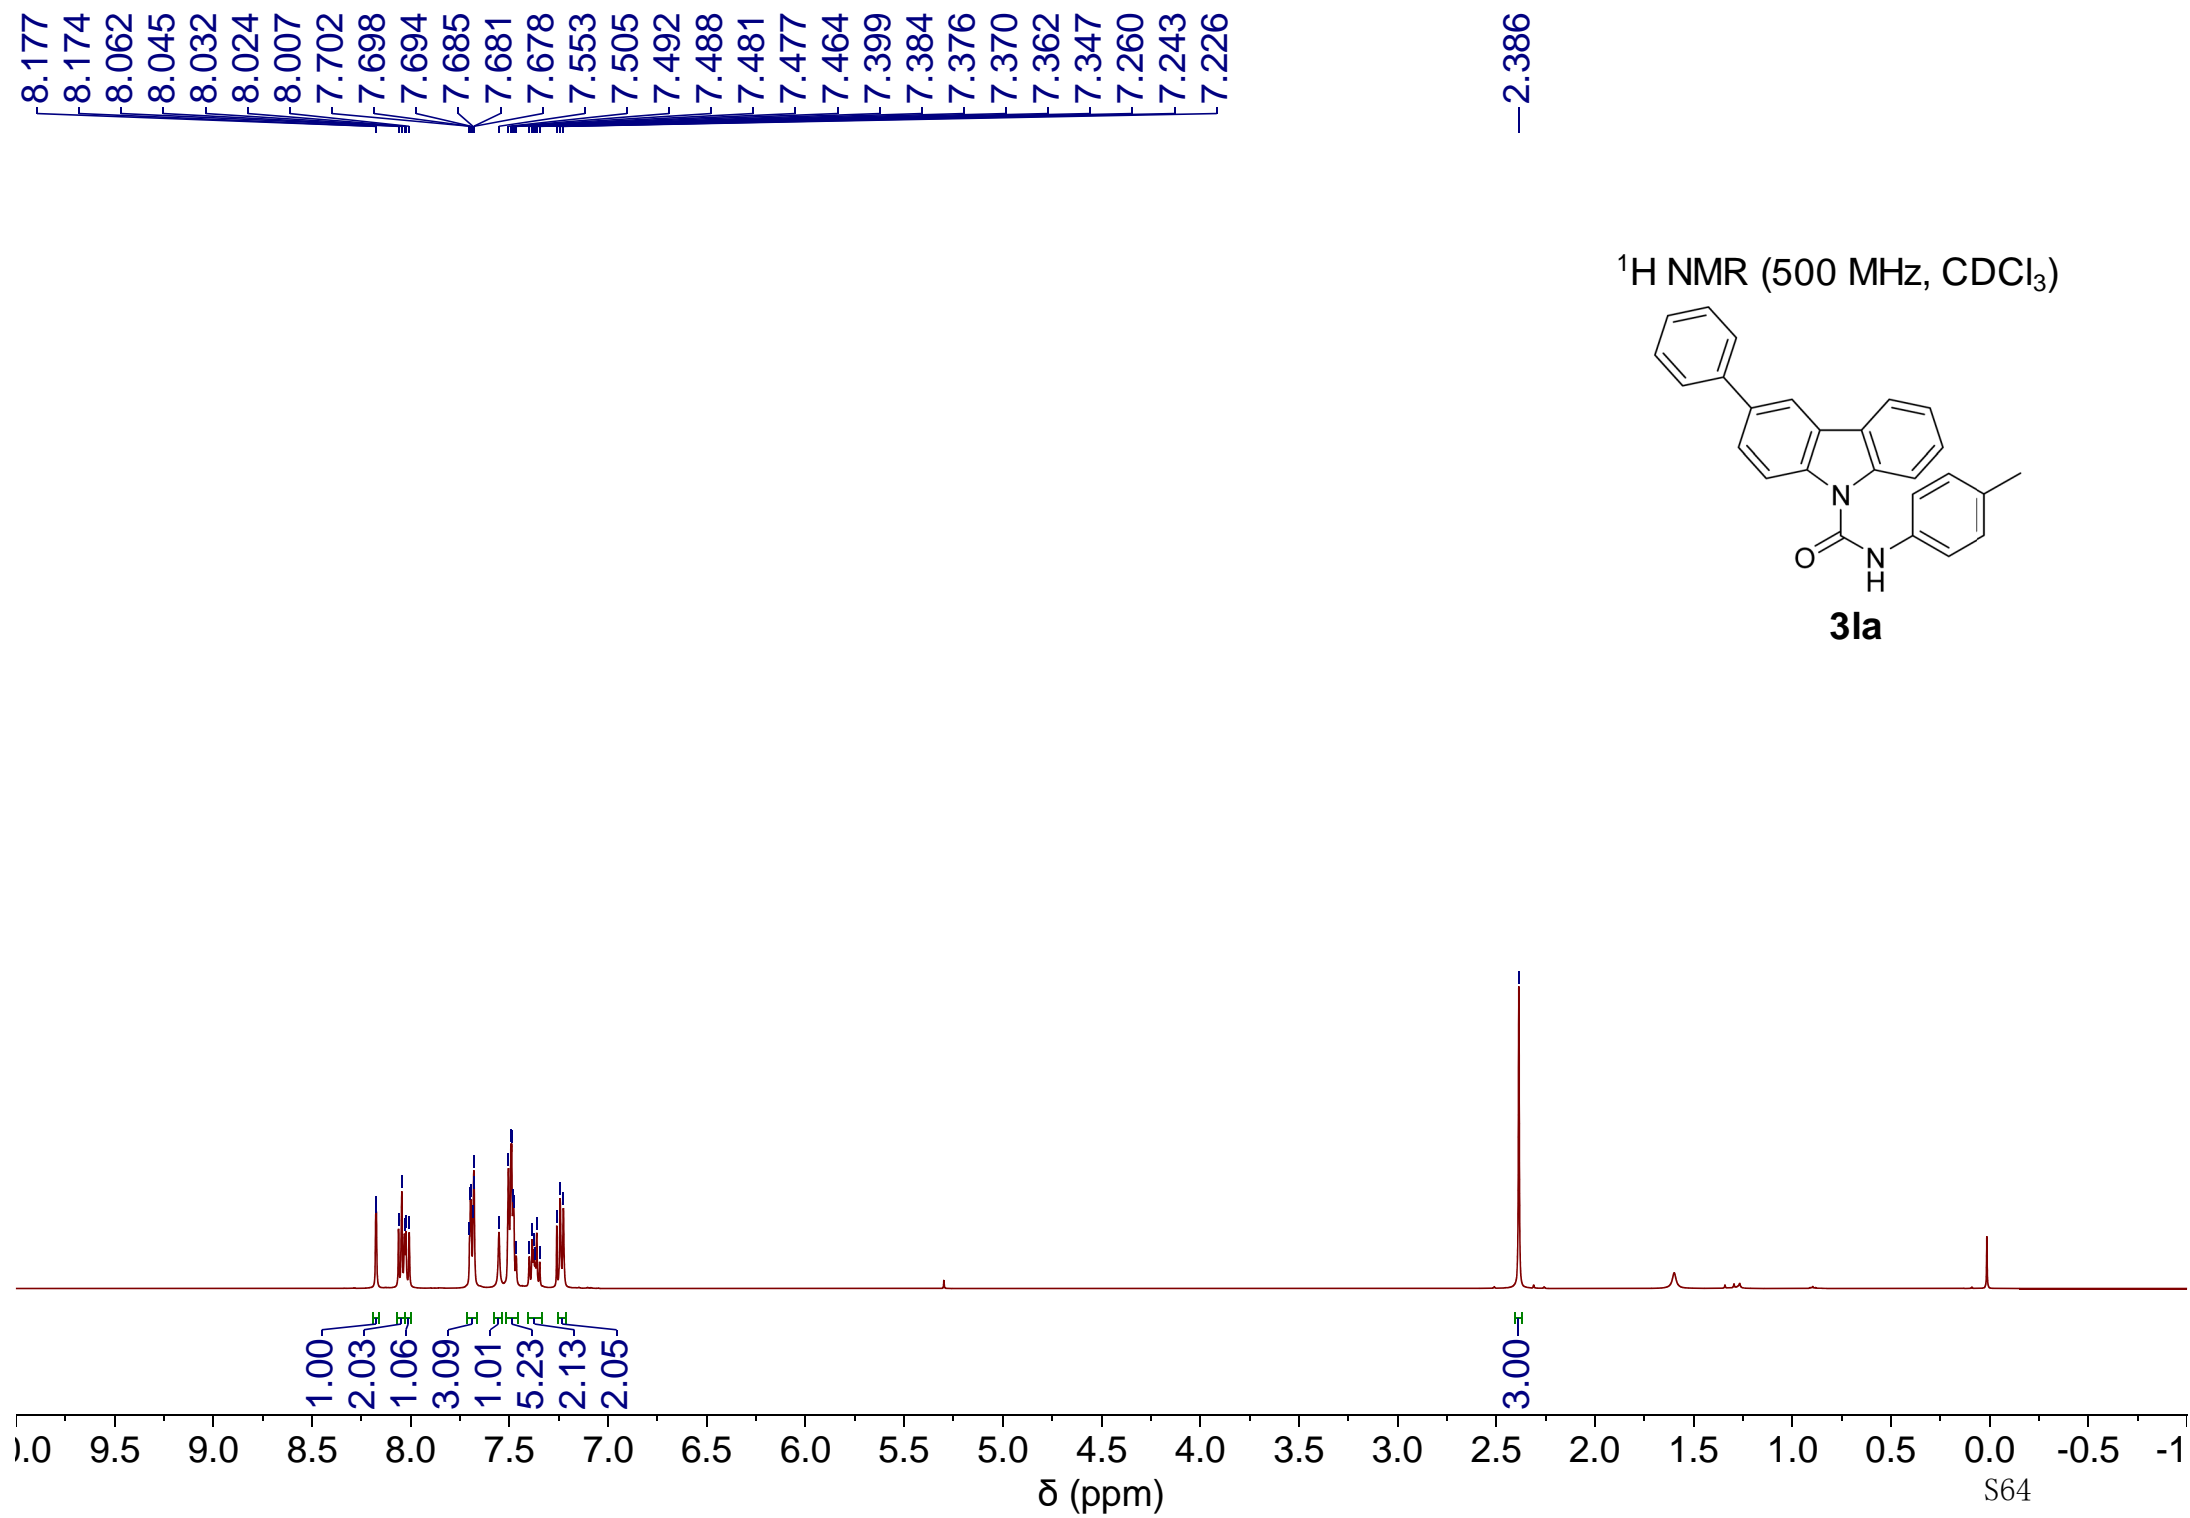

<sup>13</sup>C NMR (126 MHz, CDCl<sub>3</sub>)

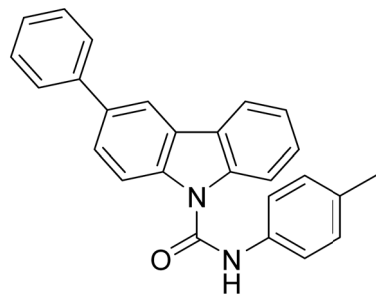

**3la**

150.26  
141.24  
138.70  
137.69  
136.05  
134.68  
134.63  
129.99  
129.01  
127.43  
127.36  
127.23  
126.51  
125.86  
125.42  
122.78  
120.48  
120.24  
118.74  
113.88  
113.68  
77.41  
77.16  
76.91

-21.05

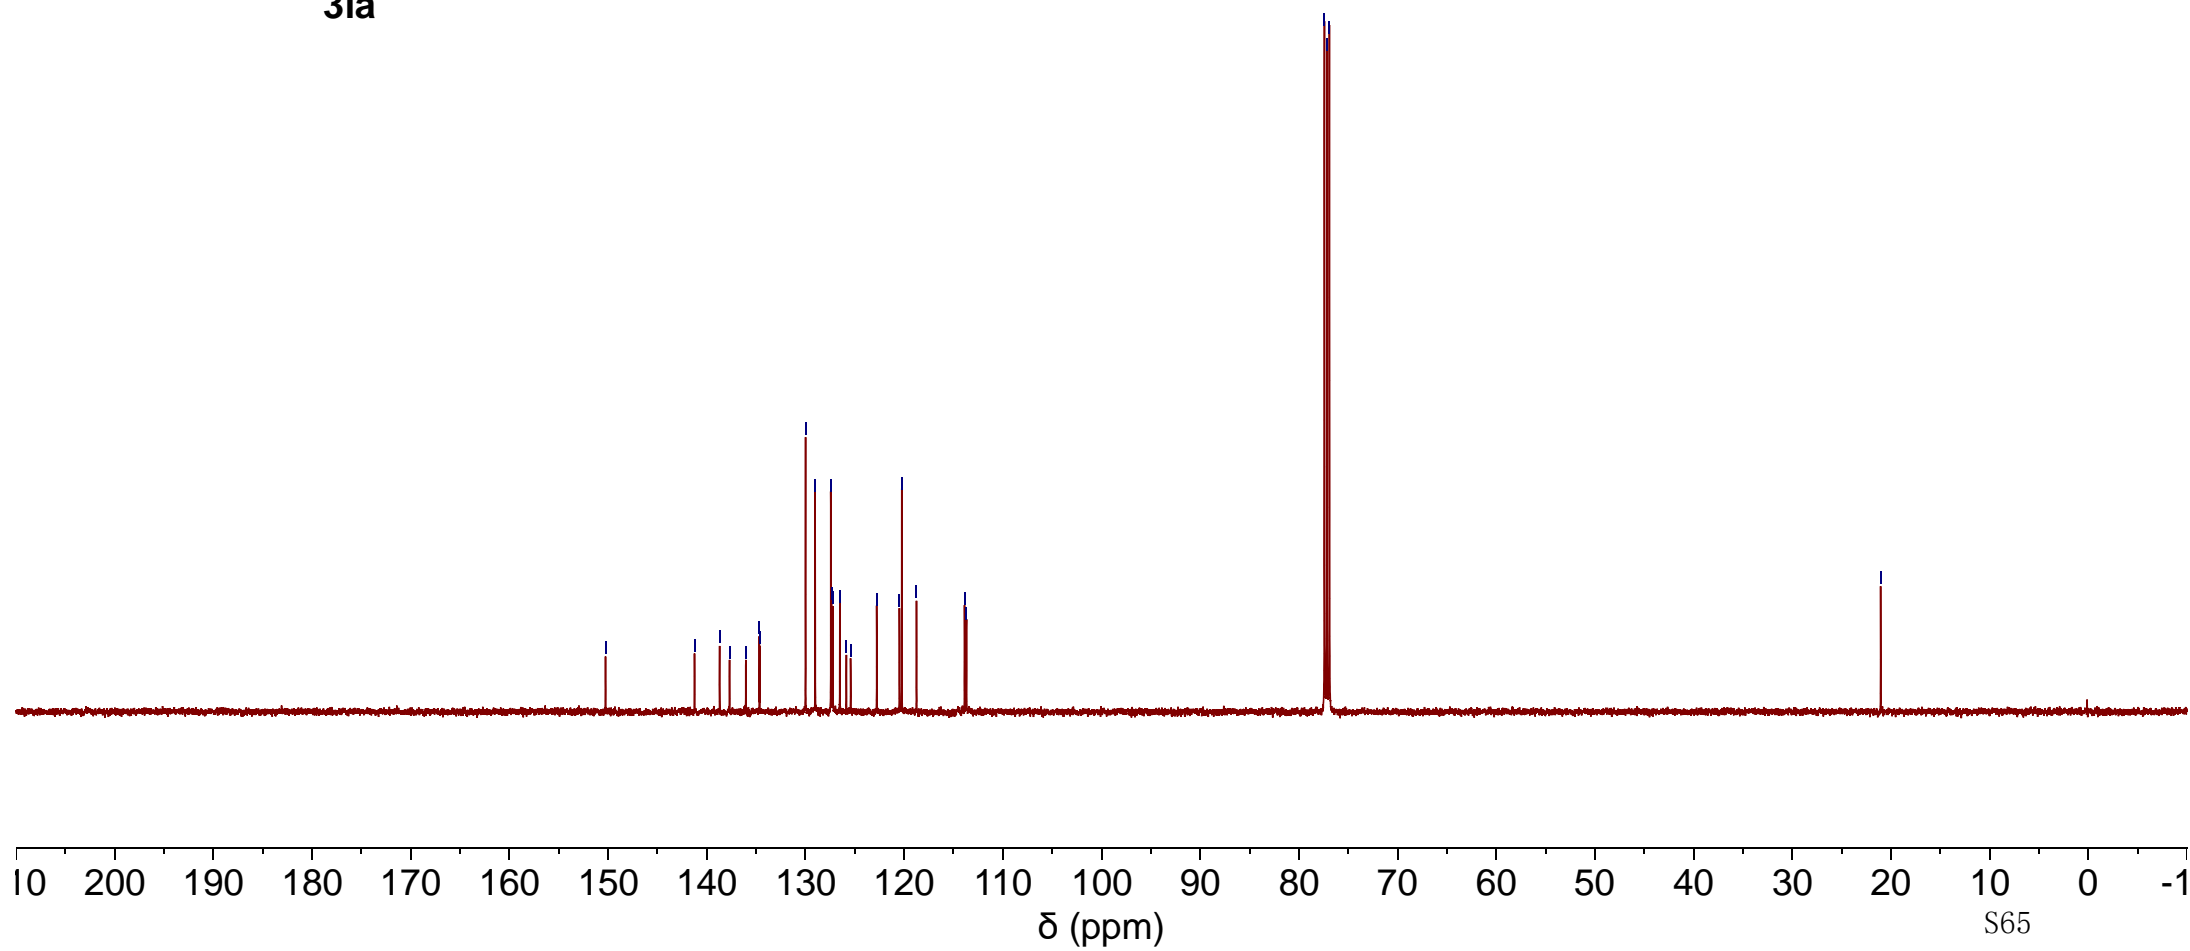

8.748  
8.732  
8.543  
8.527  
8.233  
8.215  
8.066  
8.049  
7.999  
7.983  
7.899  
7.881  
7.727  
7.712  
7.697  
7.604  
7.551  
7.536  
7.523  
7.507  
7.488  
7.477  
7.462  
7.447  
7.254  
7.248  
7.233  
5.293

-2.383

-1.568

-0.000

<sup>1</sup>H NMR (500 MHz, CDCl<sub>3</sub>)

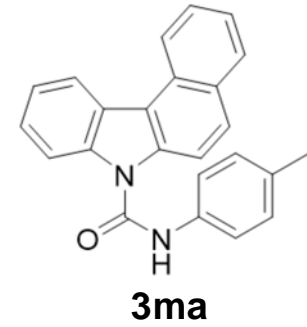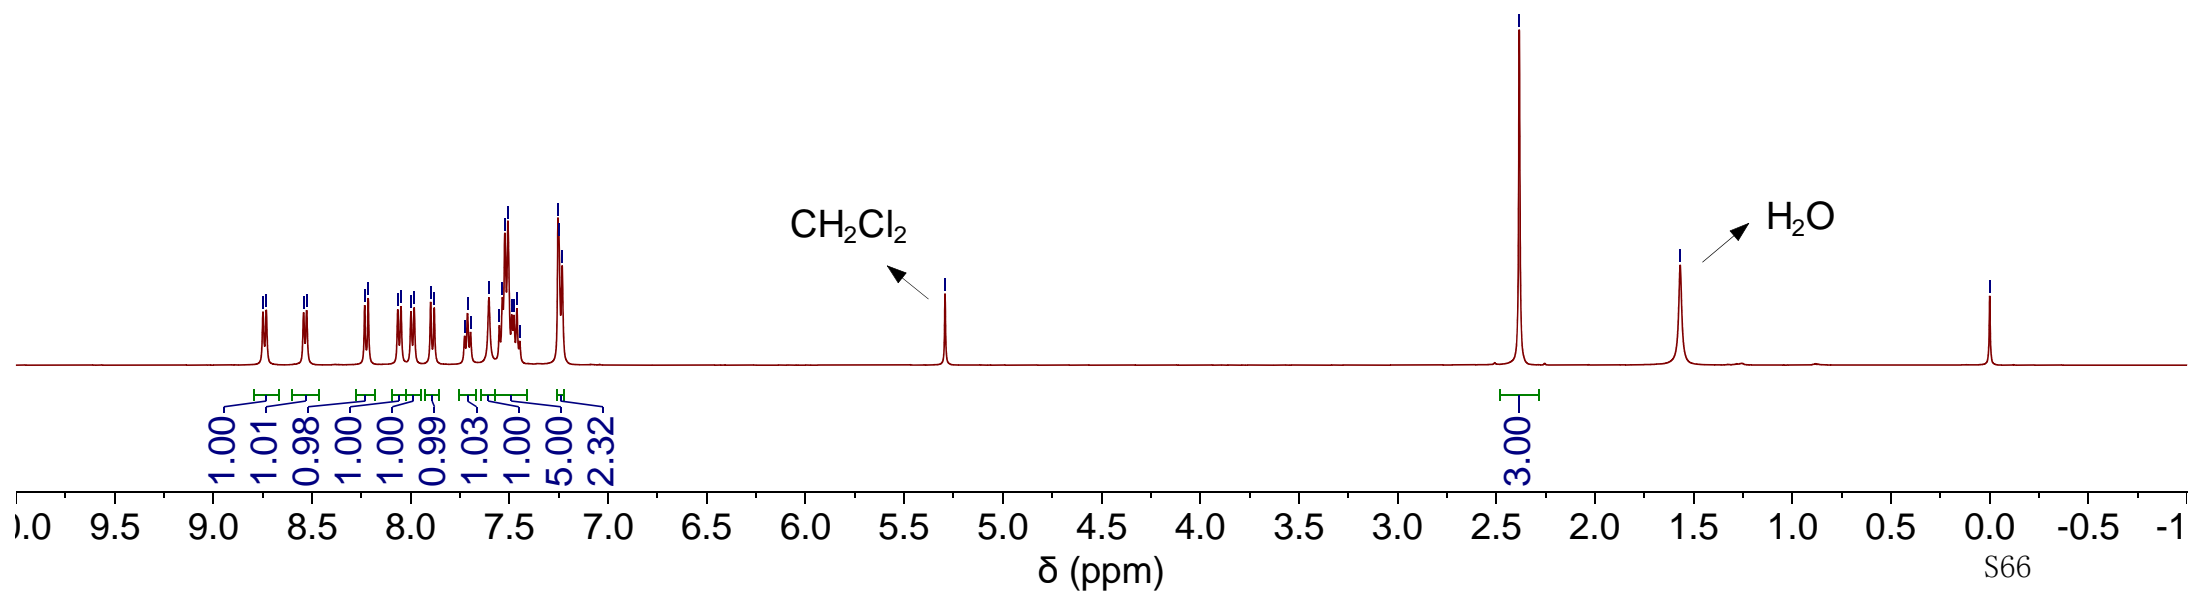

<sup>13</sup>C NMR (126 MHz, CDCl<sub>3</sub>)

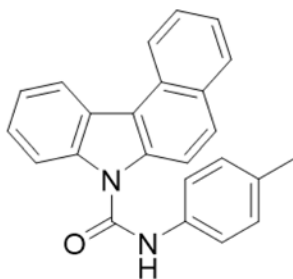

**3ma**

149.94  
137.56  
136.41  
134.90  
134.54  
130.43  
130.05  
129.36  
129.27  
128.48  
127.39  
125.92  
125.75  
124.43  
123.63  
123.01  
122.63  
120.21  
117.94  
113.90  
113.18  
77.41  
77.16  
76.91

-21.07

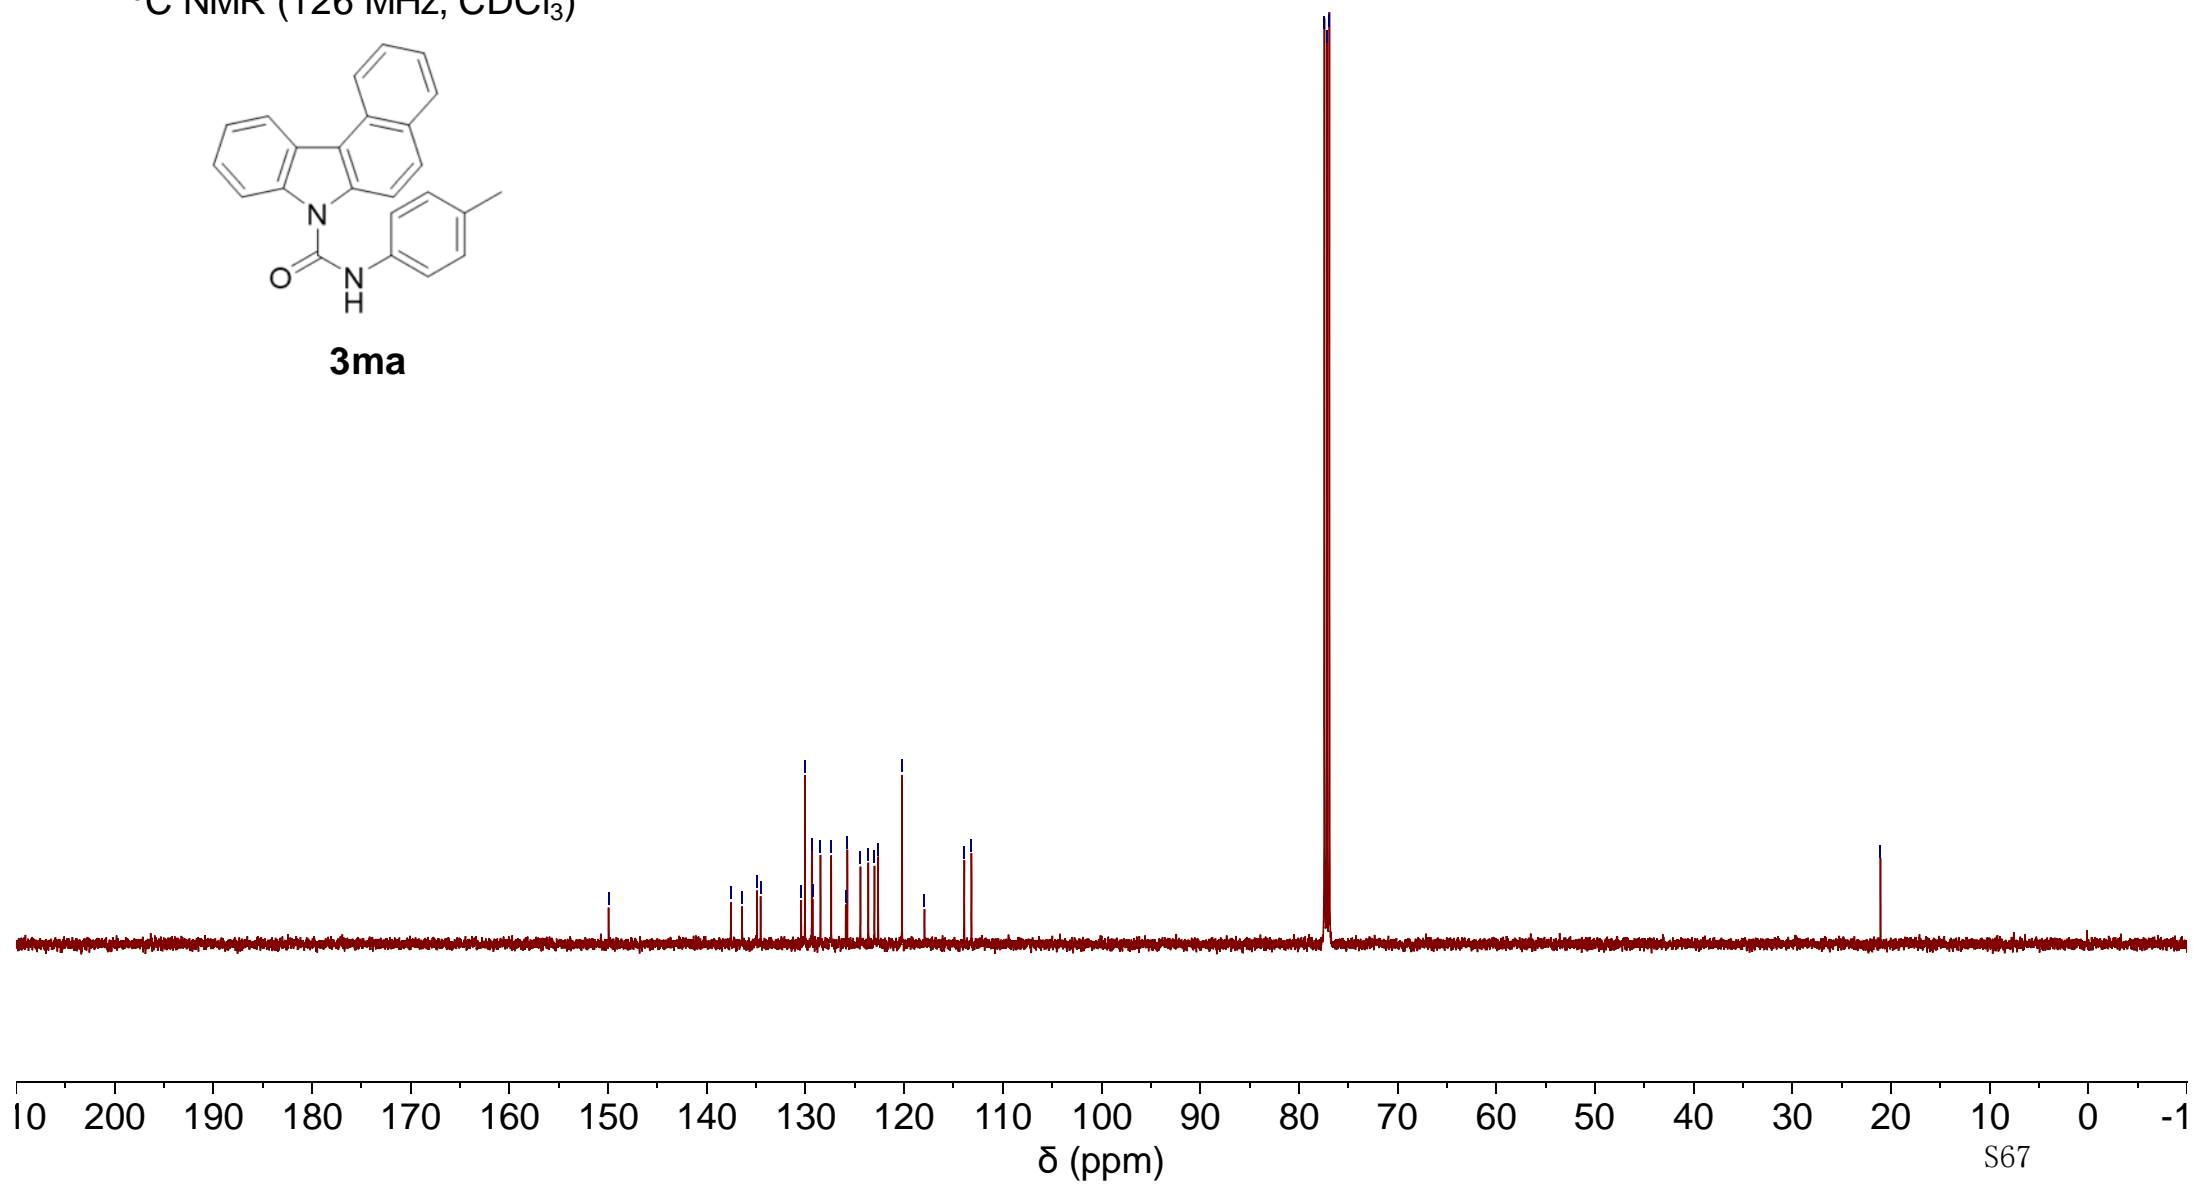

8.114  
8.109  
8.070  
8.066  
7.966  
7.951  
7.792  
7.788  
7.776  
7.771  
7.756  
7.741  
7.544  
7.453  
7.438  
7.422  
7.407  
7.359  
7.344  
7.329  
7.299  
7.286  
7.273  
7.189  
7.173

—2.333

—1.504

<sup>1</sup>H NMR (500 MHz, CDCl<sub>3</sub>)

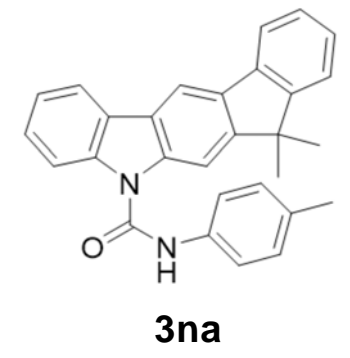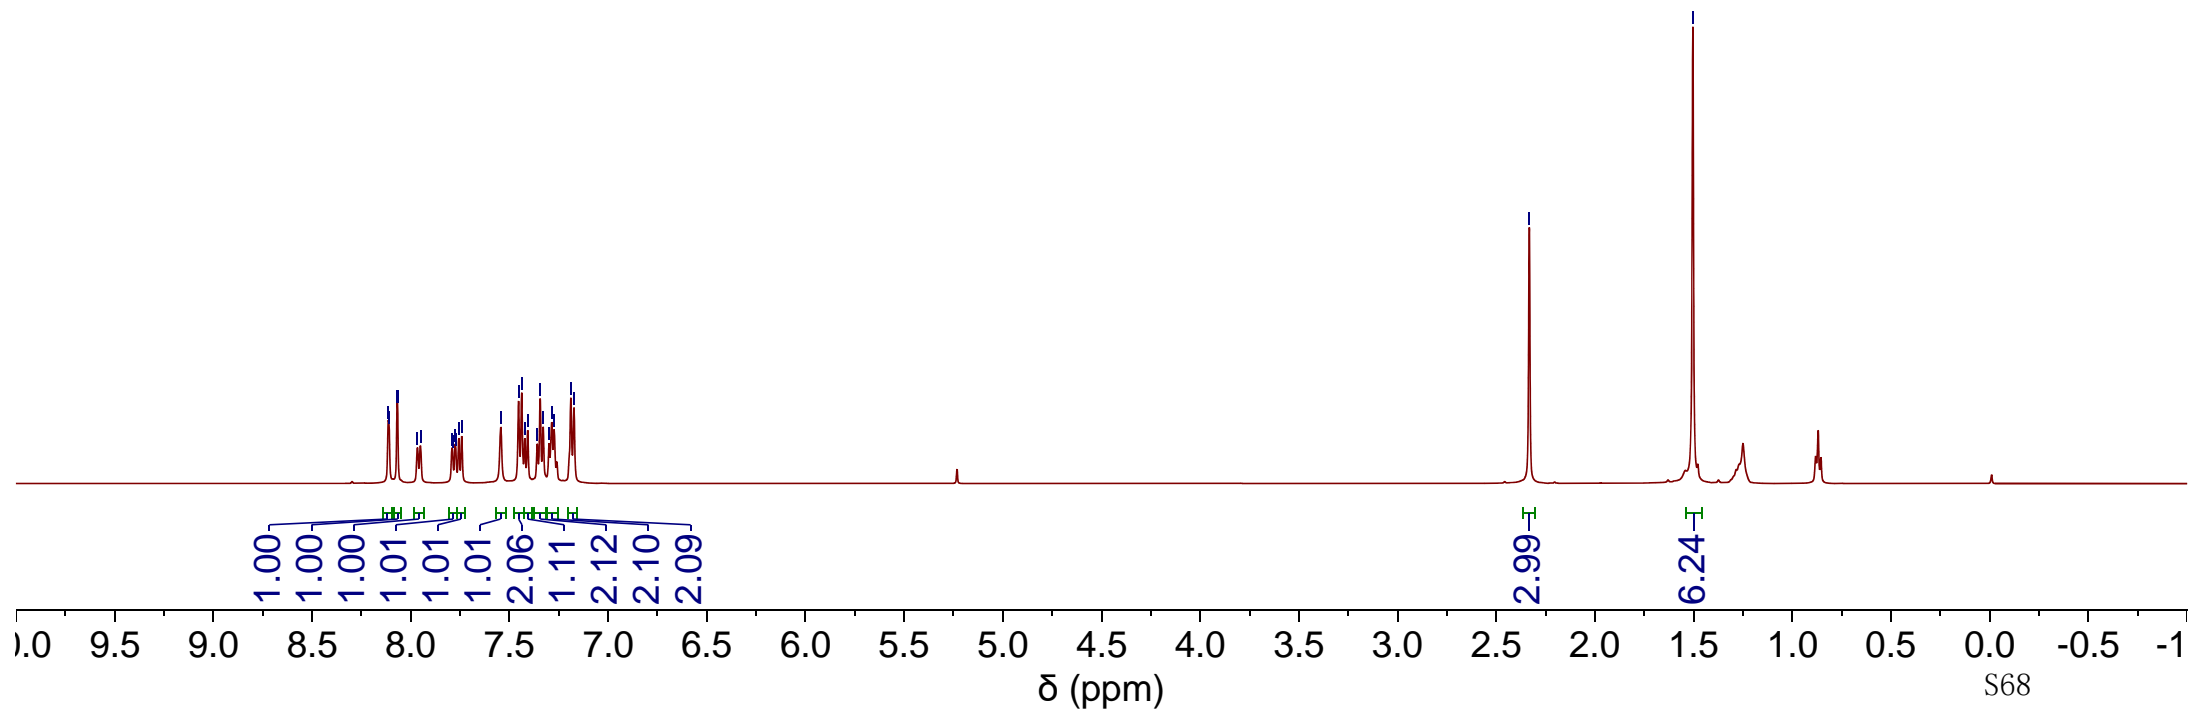

153.96  
153.82  
150.39  
139.08  
138.60  
138.17  
134.70  
134.56  
134.54  
129.94  
127.17  
127.00  
126.60  
125.74  
124.52  
122.77  
122.56  
120.36  
120.13  
119.78  
113.02  
111.02  
108.52  
77.42  
77.16  
76.91

-47.12

-27.83

-21.01

$^{13}\text{C}$  NMR (126 MHz,  $\text{CDCl}_3$ )

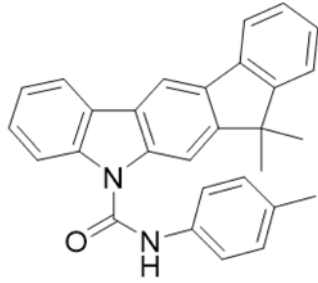

**3na**

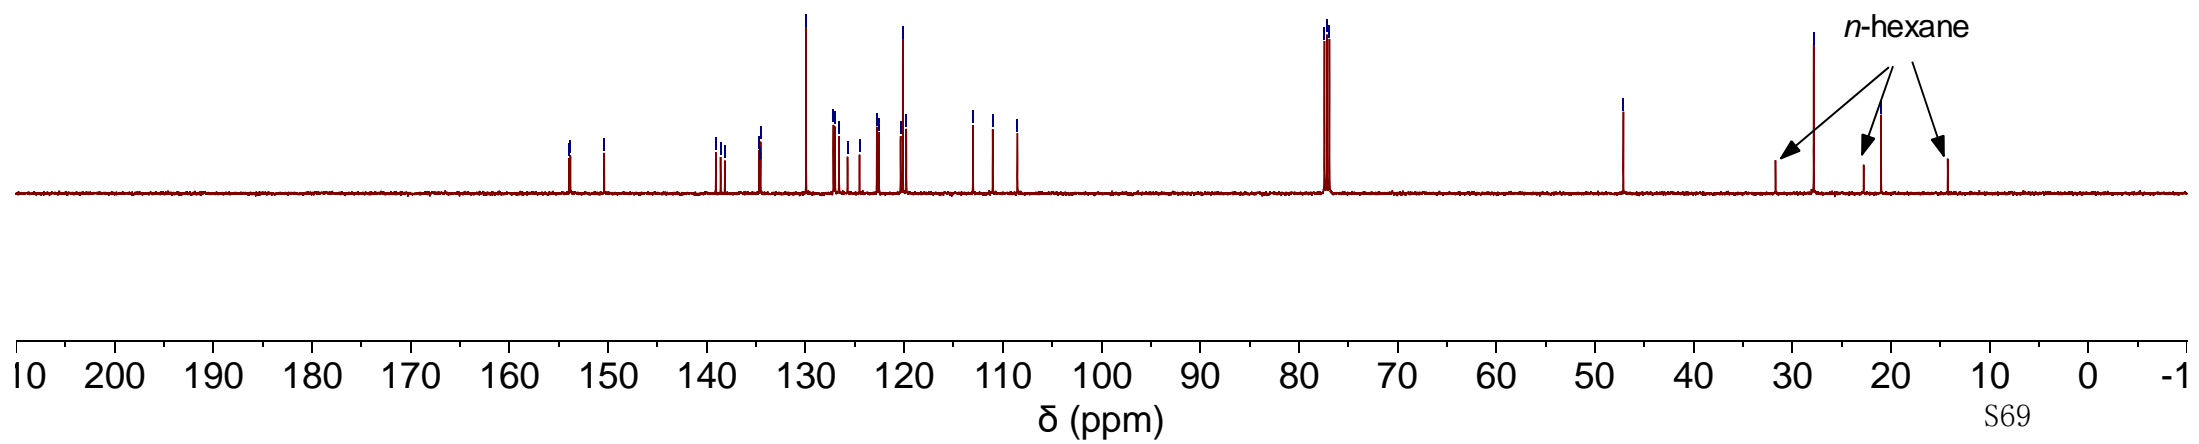

8.733  
8.716  
8.072  
8.057  
7.848  
7.832  
7.410  
7.395  
7.379  
7.256  
7.240  
7.224

3.451

2.500  
2.321

<sup>1</sup>H NMR (500 MHz, DMSO-*d*<sub>6</sub>)

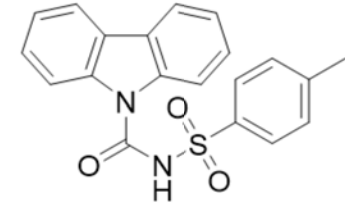

**3at**

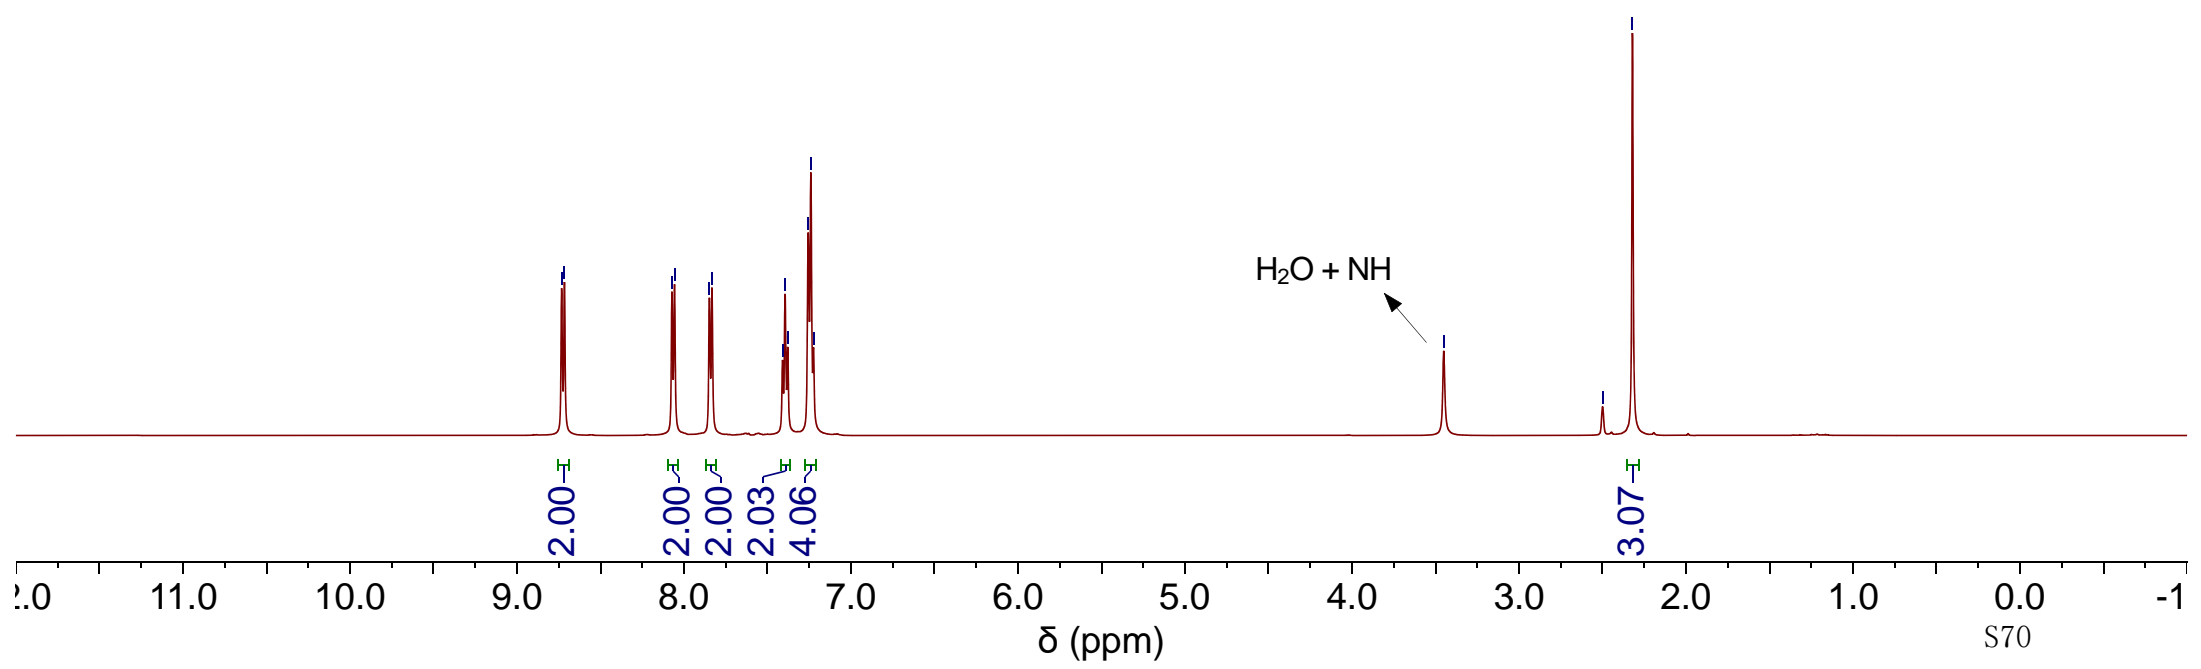

—156.35  
143.03  
139.90  
139.34  
128.40  
126.97  
126.08  
124.17  
121.08  
119.30  
117.10

40.02  
39.85  
39.68  
39.52  
39.35  
39.18  
39.02  
—20.98

<sup>13</sup>C NMR (126 MHz, DMSO-*d*<sub>6</sub>)

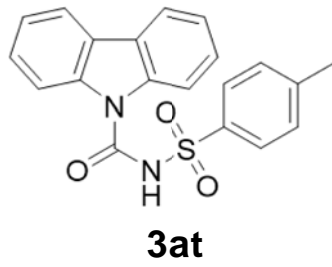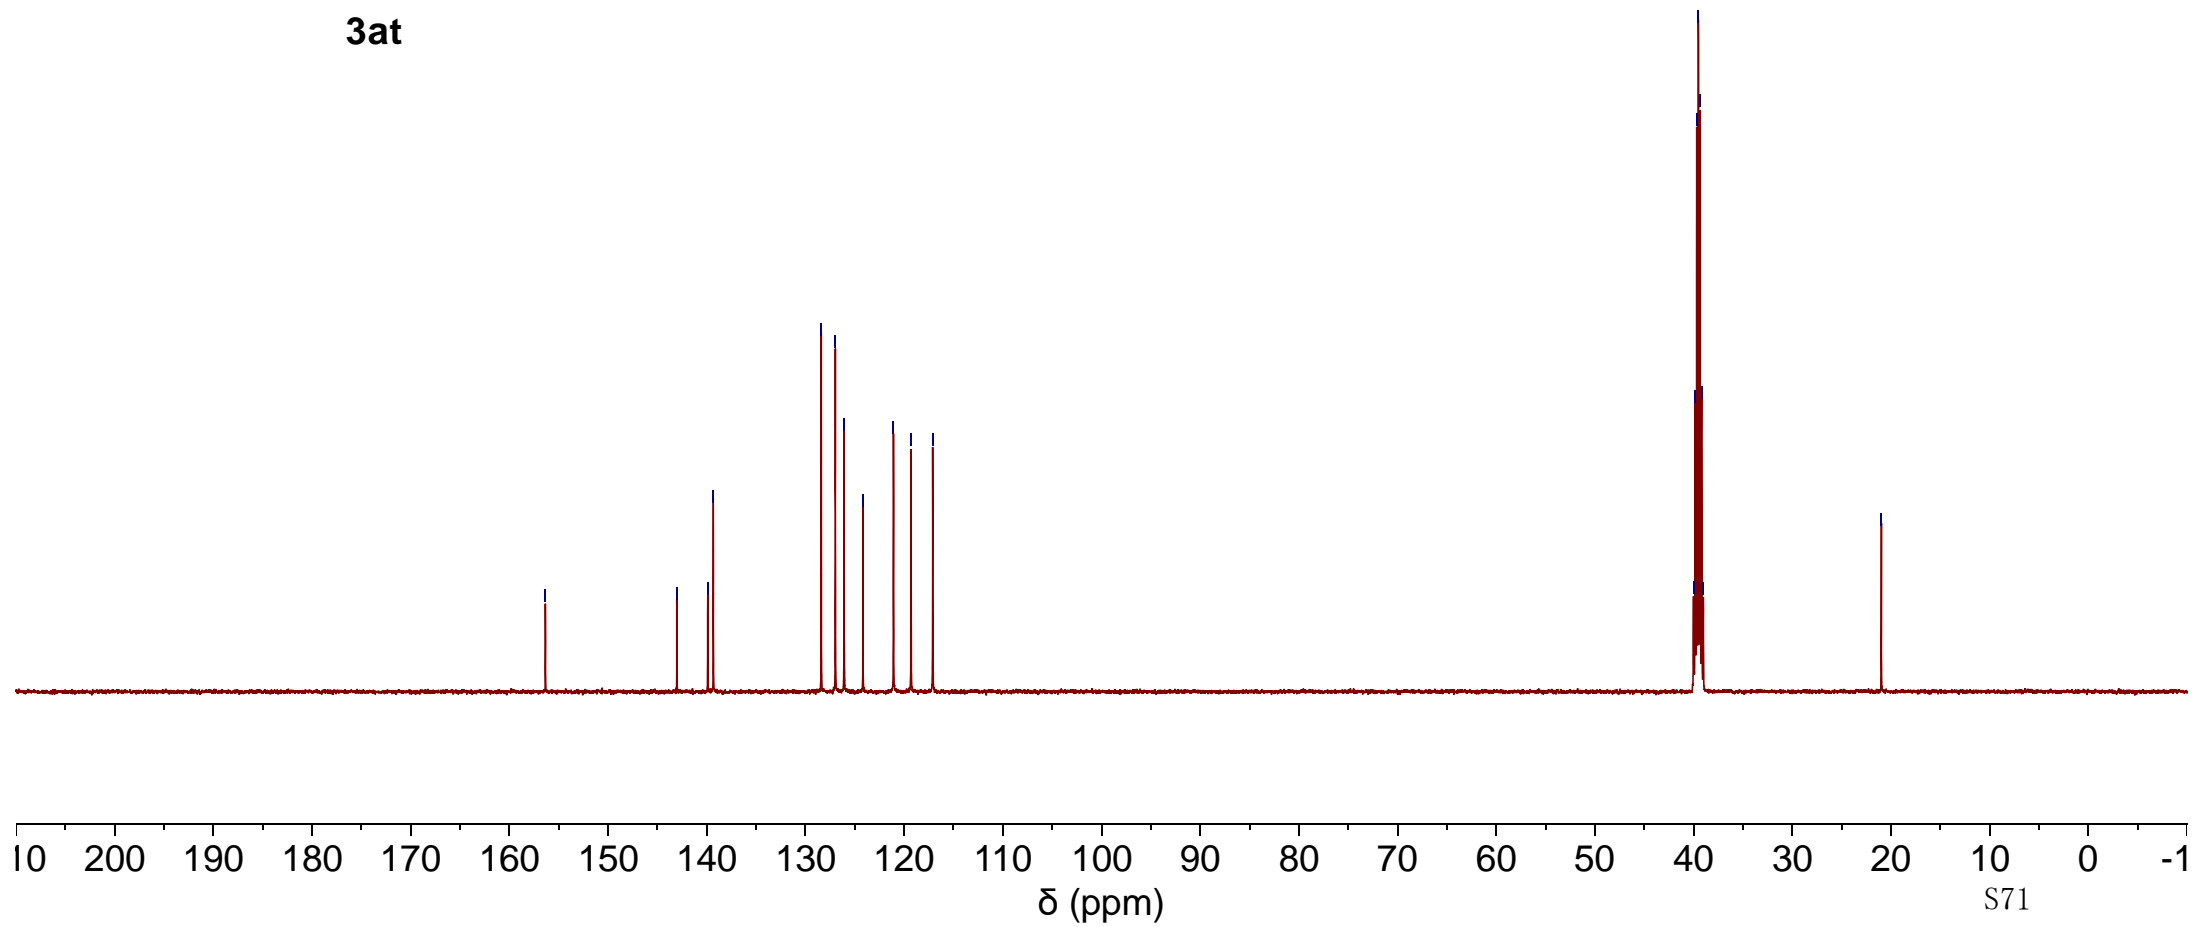



8.664  
8.647  
8.500  
8.495  
8.476  
8.471  
8.092  
8.080  
8.075  
8.063  
8.052  
8.050  
8.037  
8.034  
7.817  
7.814  
7.805  
7.801  
7.384  
7.382  
7.370  
7.368  
7.365  
7.353  
7.351  
7.253  
7.237  
7.223  
7.221  
7.102  
7.090  
7.085  
7.072  
2.385  
2.308  
2.504  
2.500  
2.496  
2.493  
2.325

<sup>1</sup>H NMR (500 MHz, DMSO-*d*<sub>6</sub>)

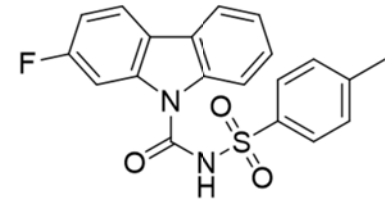

**3gt**

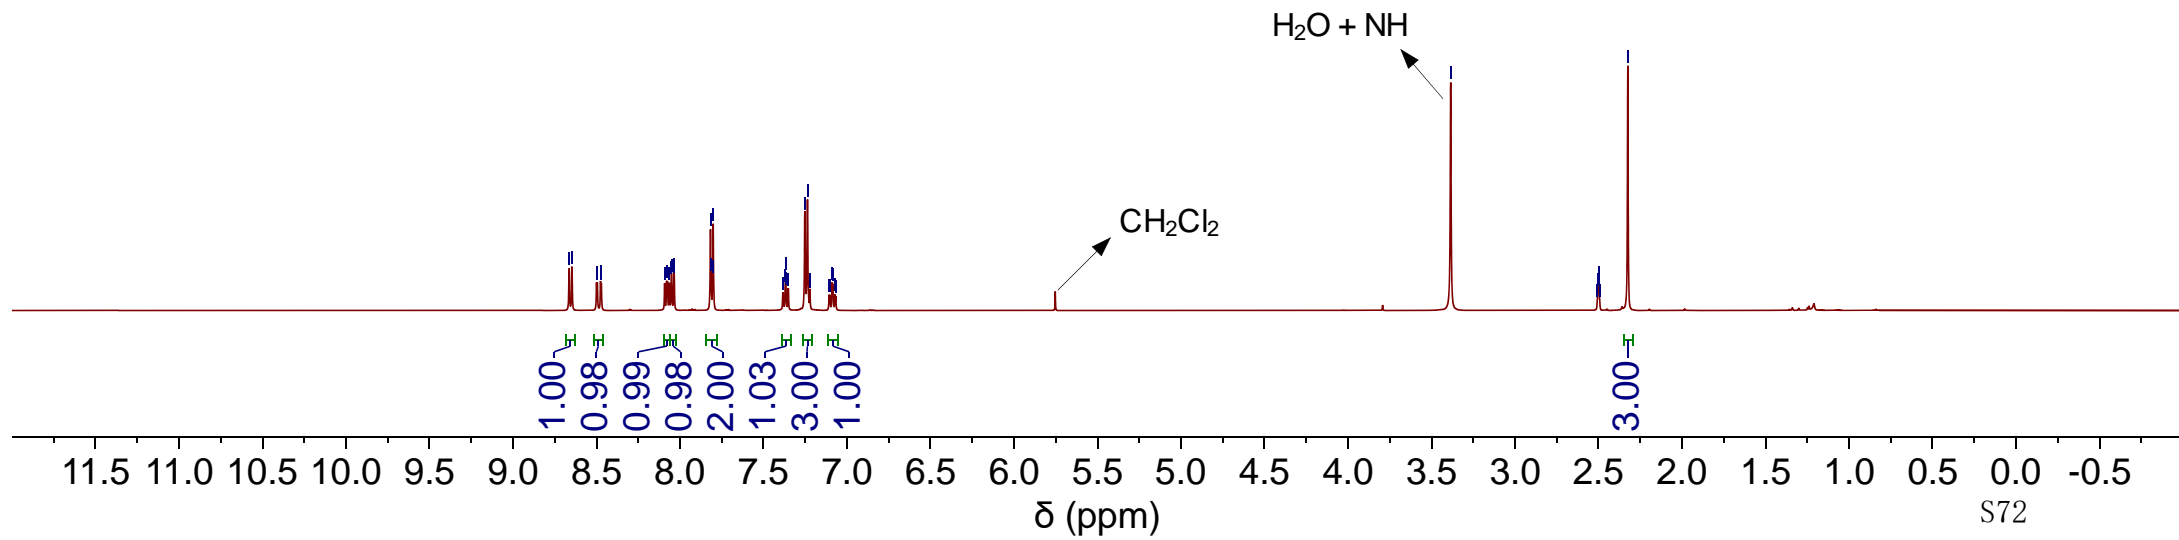

<sup>13</sup>C NMR (126 MHz, DMSO-d<sub>6</sub>)

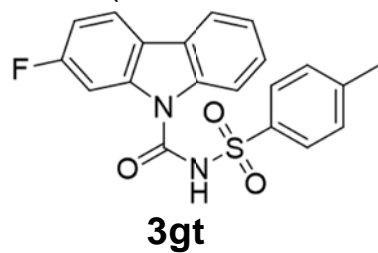

162.03  
160.14  
155.86  
142.83  
139.88  
139.81  
128.34  
126.92  
125.74  
123.60  
121.34  
120.72  
120.46  
120.38  
119.11  
116.93  
108.78  
108.58  
103.90  
103.67

40.02  
39.85  
39.69  
39.52  
39.35  
39.19  
39.02  
-20.92

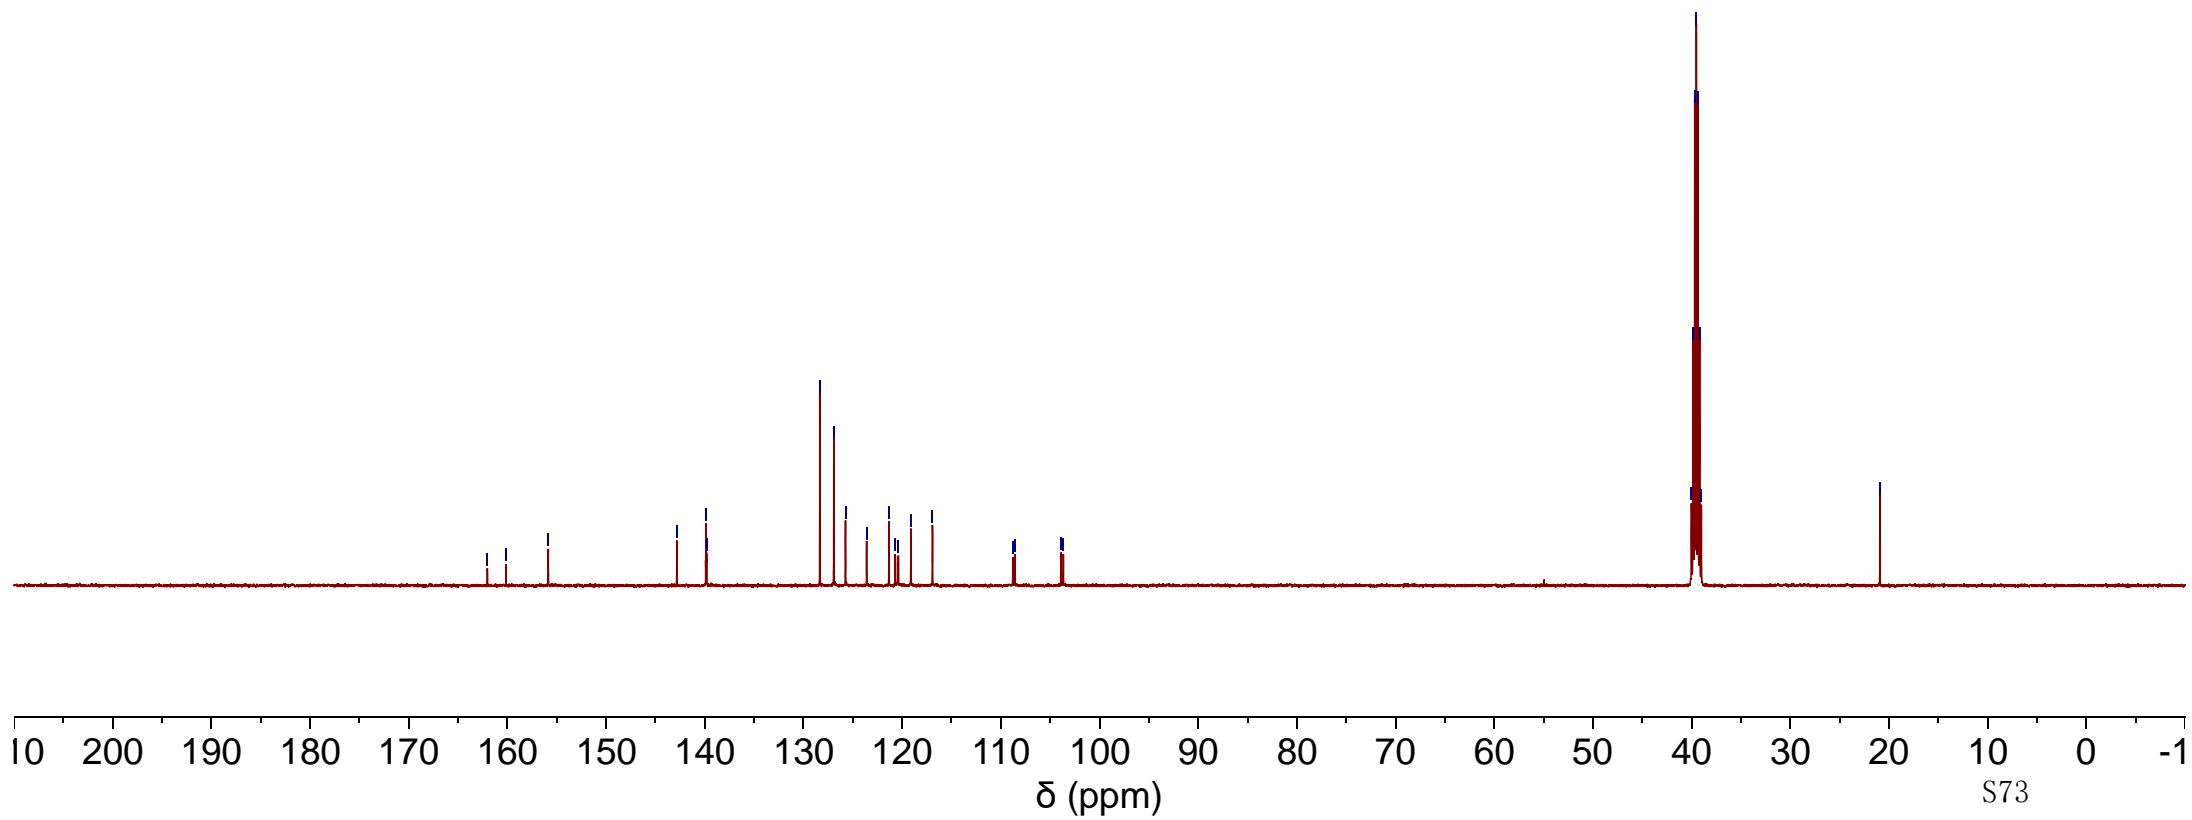

8.657  
8.640  
8.286  
7.945  
7.929  
7.912  
7.797  
7.781  
7.302  
7.287  
7.271  
7.247  
7.231  
7.196  
7.181  
7.167  
6.858  
6.853  
6.841  
6.836

—3.790

—3.371

~2.500

~2.324

<sup>1</sup>H NMR (500 MHz, DMSO-*d*<sub>6</sub>)

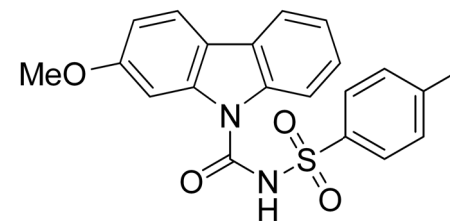

**3ht**

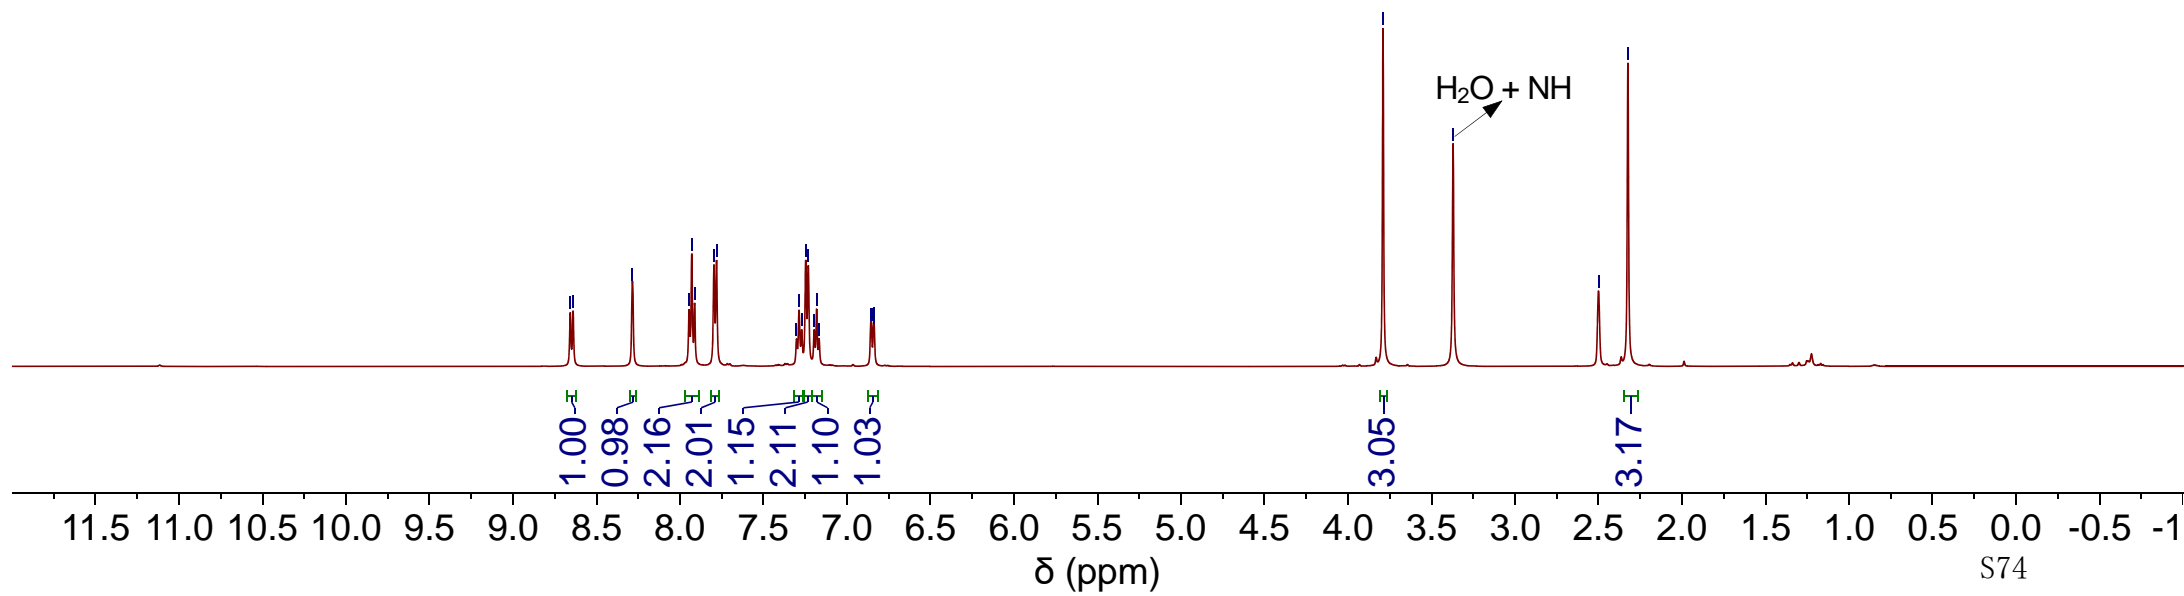

<sup>13</sup>C NMR (126 MHz, DMSO-*d*<sub>6</sub>)

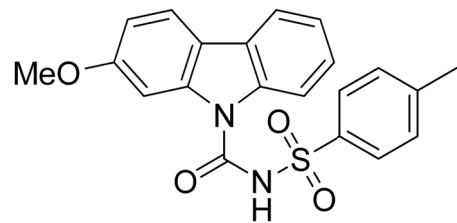

**3ht**

158.46  
156.15  
143.12  
140.65  
139.77  
139.36  
128.37  
126.85  
124.67  
124.29  
121.01  
119.80  
118.39  
117.78  
116.94  
109.16  
101.53

55.24  
40.02  
39.86  
39.69  
39.52  
39.35  
39.19  
39.02  
20.94

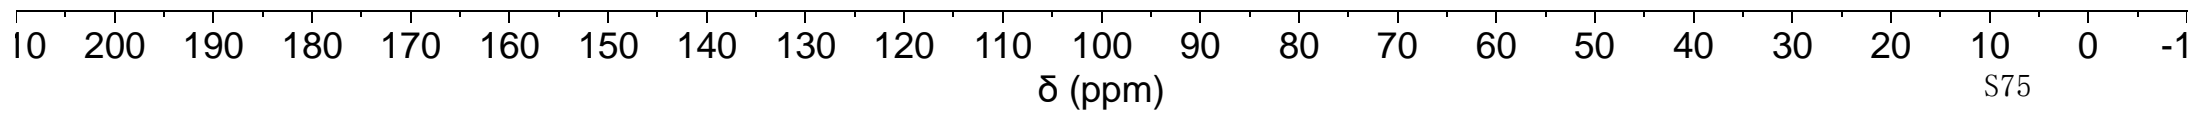

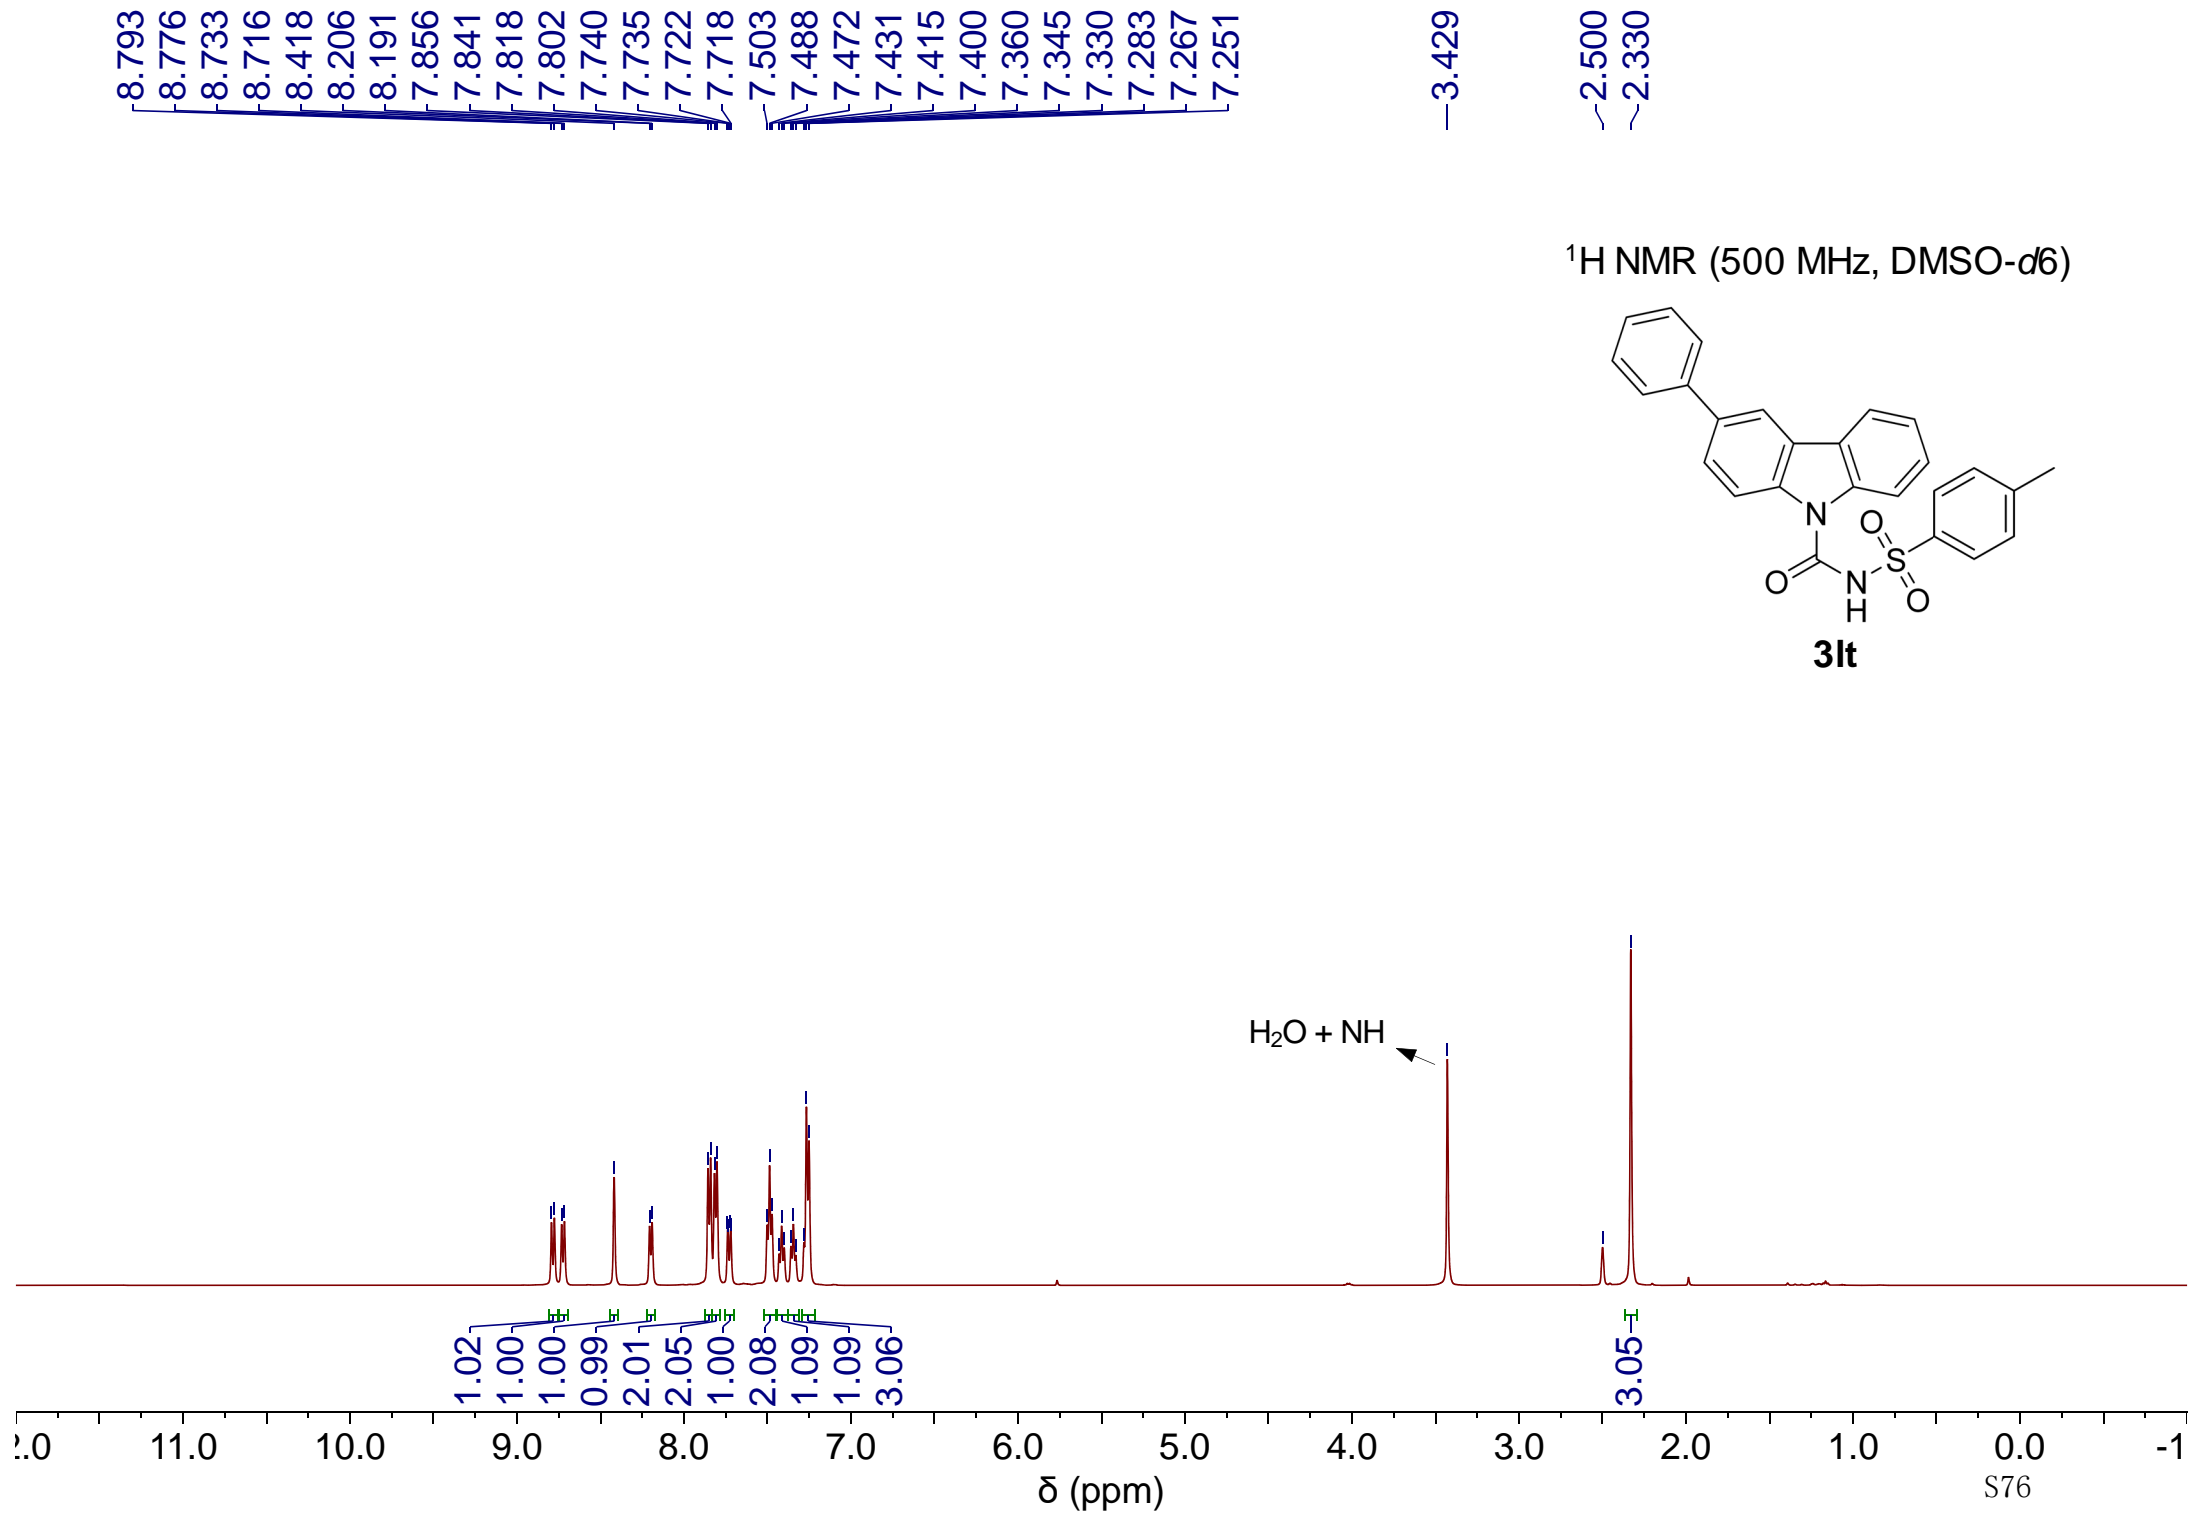

<sup>13</sup>C NMR (126 MHz, DMSO-*d*<sub>6</sub>)

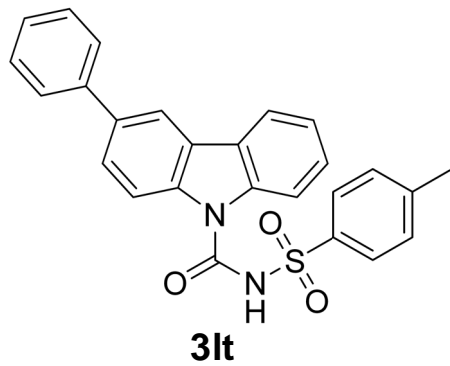

156.21  
143.02  
140.75  
139.88  
139.81  
138.87  
133.17  
128.96  
128.39  
127.01  
126.82  
126.79  
126.29  
124.91  
124.84  
124.29  
121.17  
119.63  
117.46  
117.28  
117.13

40.02  
39.85  
39.69  
39.52  
39.35  
39.19  
39.02  
-20.98

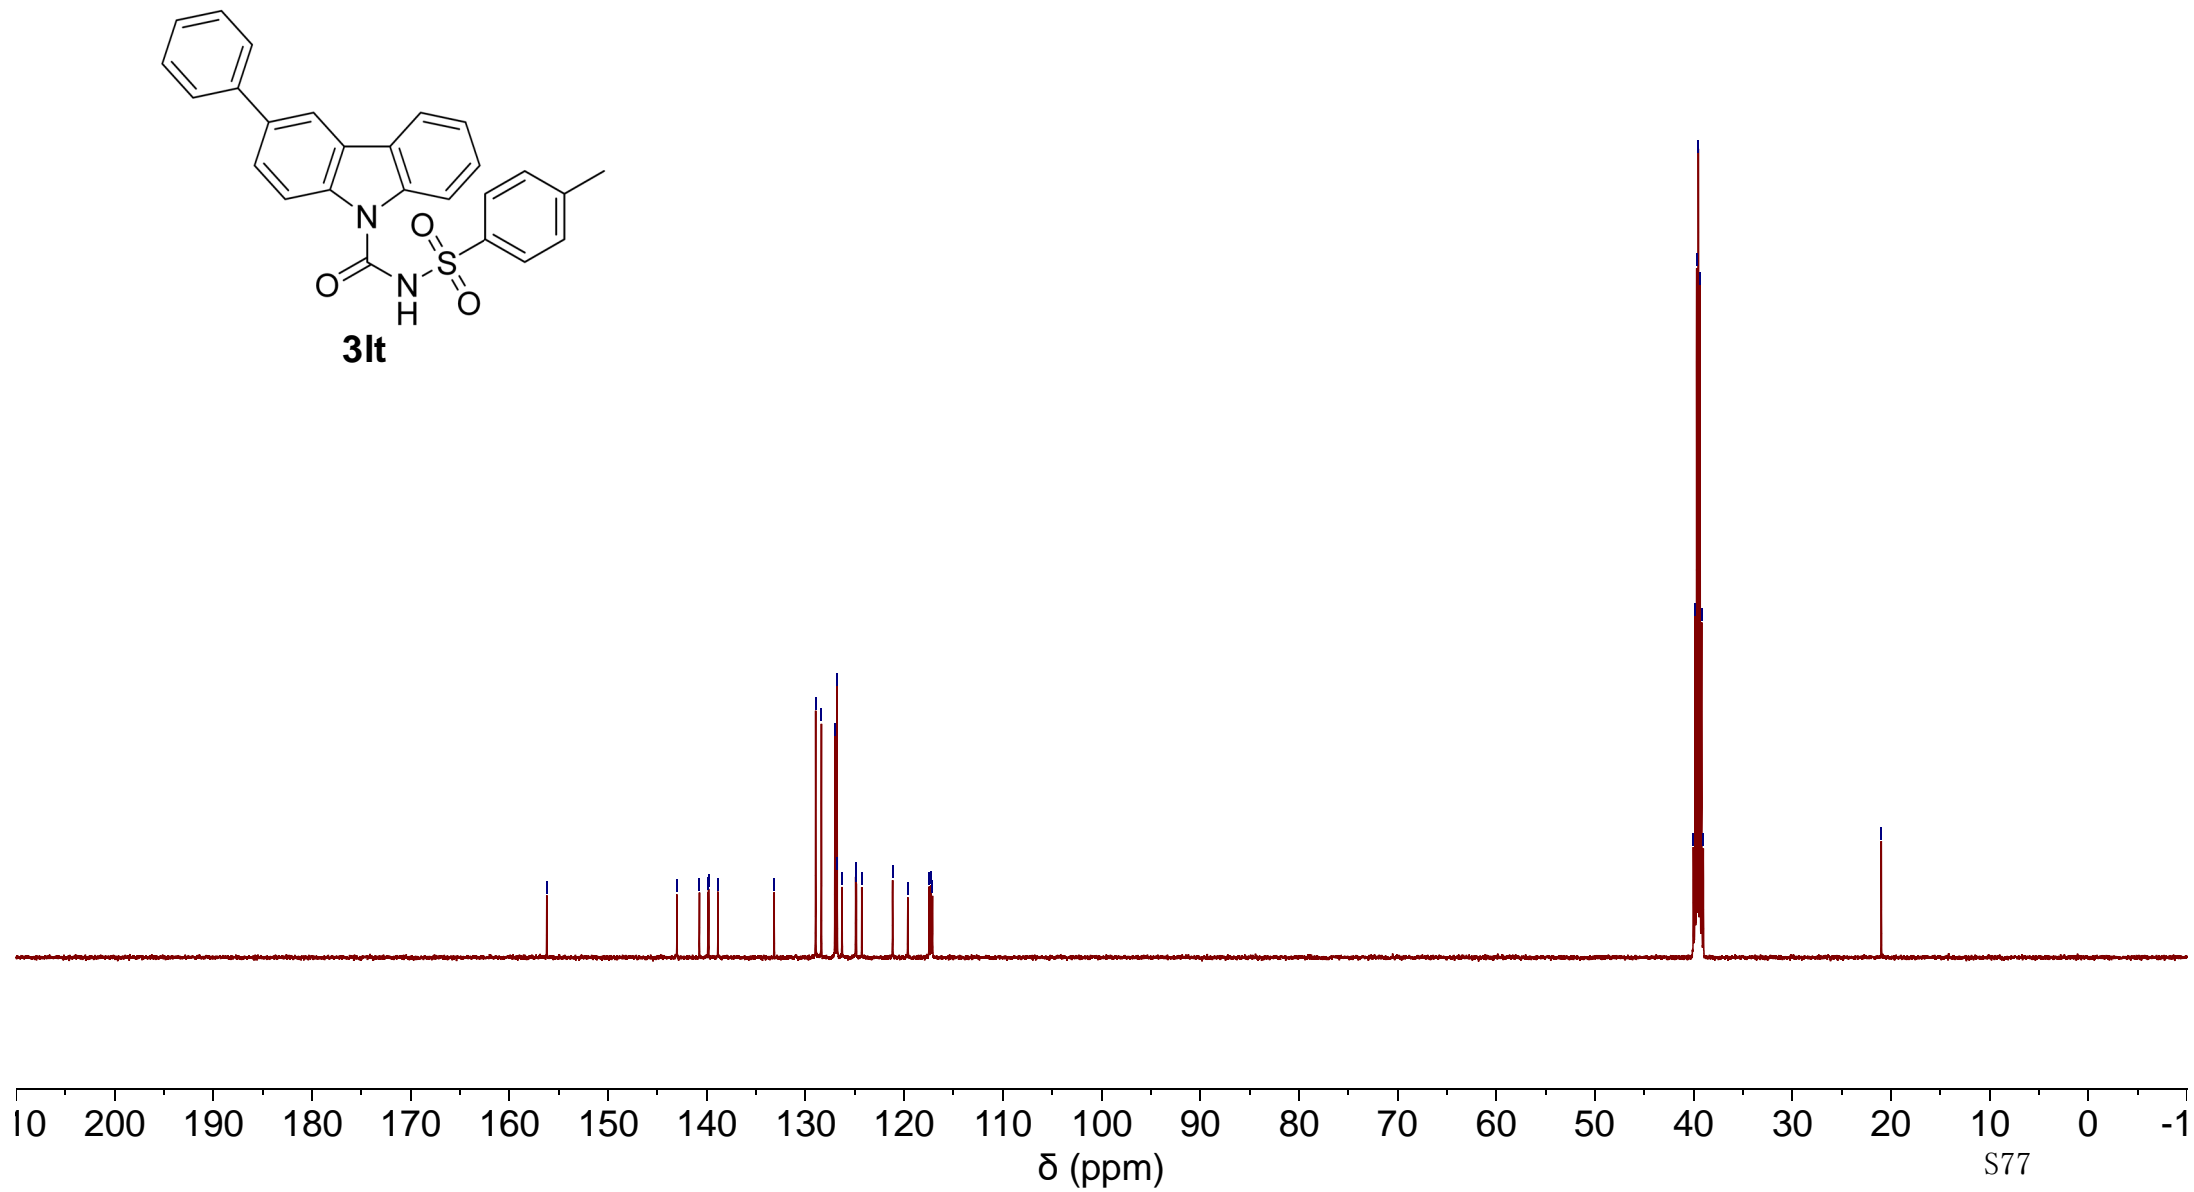

<sup>1</sup>H NMR (500 MHz, DMSO-*d*<sub>6</sub>)

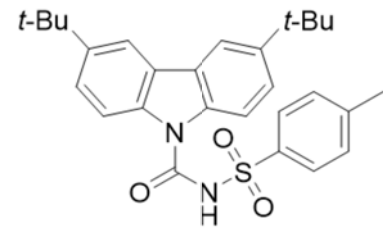

**3jt**

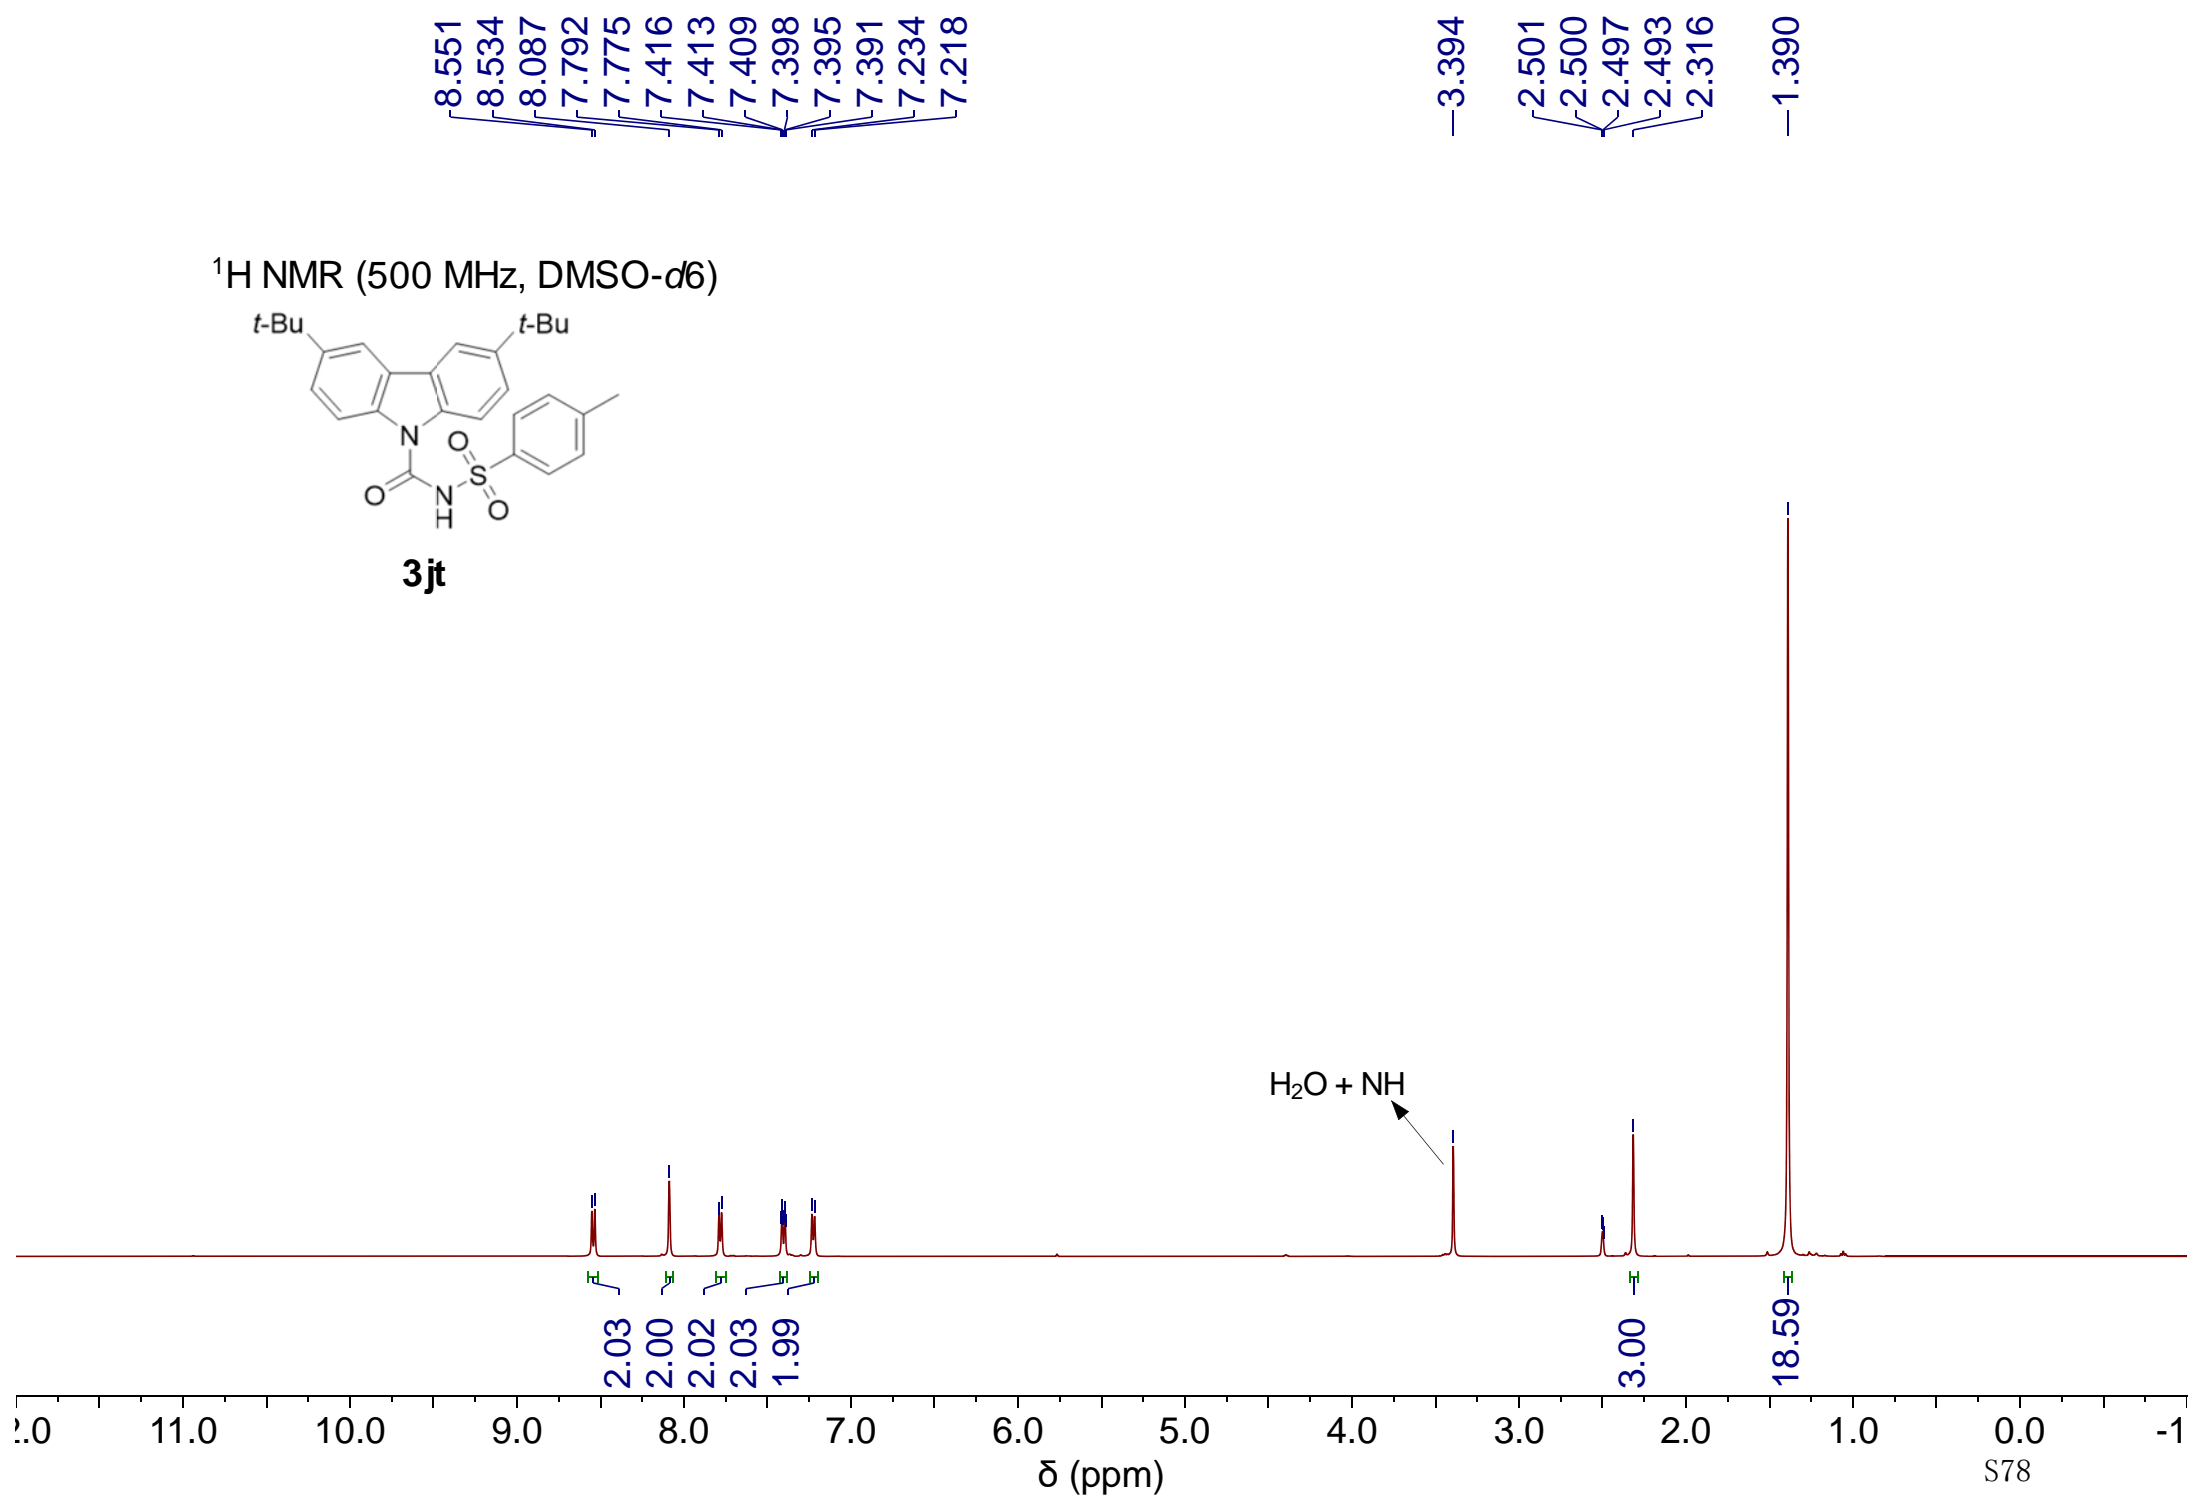

<sup>13</sup>C NMR (126 MHz, DMSO-*d*<sub>6</sub>)

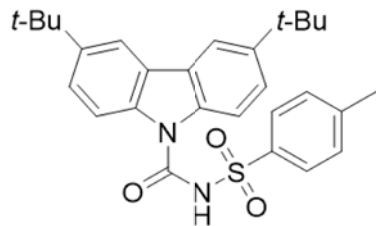

**3jt**

156.33  
143.27  
143.20  
139.67  
137.67  
128.31  
126.88  
124.18  
123.37  
116.52  
115.39

40.02  
39.85  
39.69  
39.52  
39.35  
39.19  
39.02  
34.43  
31.80  
20.97

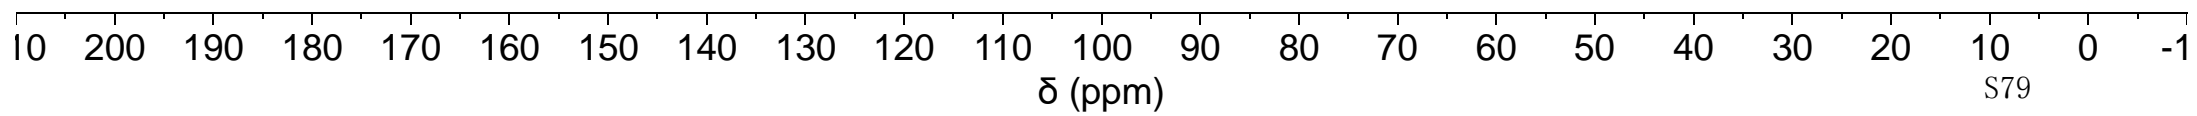

Supplement: d4ob00771a1.pdf [file d4ob00771a1.pdf]
